# Supplementary material for: Glass engineering of aminotriazine-based materials with sub-ambient Tg and high kinetic stability
Source: Royal Society of Chemistry journal article supplement (doi:10.1039/d0ce00500b), 2020-01-01

## Supporting Information

### Glass engineering of aminotriazine-based materials with sub-ambient $T_g$ and high kinetic stability

Zeinab Kara Ali,<sup>†</sup> Anna Iankovitch,<sup>‡</sup> Mahboubeh Jokar,<sup>‡</sup> Thierry Maris,<sup>†</sup> Olivier Lebel,<sup>‡,\*</sup> Christian Pellerin<sup>†,\*</sup>

<sup>†</sup> *Département de chimie, Université de Montréal, Montréal, QC, H3C 3J7, Canada*

<sup>‡</sup> *Department of Chemistry and Chemical Engineering, Royal Military College of Canada, Kingston, ON, K7K 7B4, Canada*

\*Corresponding authors: [c.pellerin@umontreal.ca](mailto:c.pellerin@umontreal.ca); [olivier.lebel@rmc.ca](mailto:olivier.lebel@rmc.ca)

## Synthesis

Compounds **1<sub>NHMe</sub>** and **1<sub>NMe2</sub>** were synthesized following the same procedure as compound **1<sub>Et</sub>** from 2-methylamino-4,6-dichloro-1,3,5-triazine and 2-dimethylamino-4,6-dichloro-1,3,5-triazine, respectively.

### Synthesis of 2-methylamino-4,6-bis(N-methylphenylamino)-1,3,5-triazine (**1<sub>NHMe</sub>**)

Yield: 52 %;  $T_g$  7 °C; FT-IR (ATR) 3430, 3278, 3169, 3060, 3034, 2937, 1601, 1582, 1537, 1490, 1445, 1381, 1329, 1308, 1286, 1213, 1171, 1126, 1104, 1028, 997, 905, 809, 764, 695  $\text{cm}^{-1}$ ;  $^1\text{H}$  NMR (400 MHz,  $\text{CDCl}_3$ )  $\delta$  7.34 (m, 8H), 7.17 (m, 2H), 4.90 (br s, 1H), 3.47 (s, 6H), 2.84 (d,  $J = 4.5$  Hz, 3H) ppm;  $^{13}\text{C}$  NMR (100 MHz,  $\text{CDCl}_3$ )  $\delta$  166.6, 165.4, 144.9, 128.2, 126.4, 124.8, 37.2, 27.3 ppm; HRMS (ESI,  $\text{MH}^+$ ) calcd. for  $\text{C}_{18}\text{H}_{21}\text{N}_6$   $m/z$ : 321.1822, found: 321.1827.

### Synthesis of 2-dimethylamino-4,6-bis(N-methylphenylamino)-1,3,5-triazine (**1<sub>NMe2</sub>**)

Yield: 78 %;  $T_g$  -12 °C; FT-IR (ATR) 3060, 3037, 2927, 2865, 2791, 1601, 1533, 1494, 1440, 1382, 1330, 1310, 1287, 1238, 1177, 1105, 1074, 1051, 1029, 904, 808, 764, 695  $\text{cm}^{-1}$ ;  $^1\text{H}$  NMR (400 MHz,  $\text{CDCl}_3$ )  $\delta$  7.34 (m, 8H), 7.13 (t,  $J = 6.8$  Hz, 2H), 3.47 (s, 6H), 3.02 (s, 6H) ppm;  $^{13}\text{C}$  NMR (100 MHz,  $\text{CDCl}_3$ )  $\delta$  165.1, 144.9, 128.0, 126.2, 124.6, 37.1, 35.7 ppm; HRMS (ESI,  $\text{MH}^+$ ) calcd. for  $\text{C}_{19}\text{H}_{23}\text{N}_6$   $m/z$ : 335.1979, found: 335.1985.

### Synthesis of 2-dimethylamino-4-(N-methylcyclohexylamino)-6-(N-methylphenylamino)-1,3,5-triazine (**2<sub>NMe2</sub>**)

Compound **2<sub>NMe2</sub>** was synthesized following the same procedure as compound **2<sub>NHMe</sub>** with aqueous dimethylamine (40 wt%). Yield: 84 %;  $T_g$  -5 °C,  $T_m$  97 °C; FT-IR (ATR) 3059, 3028, 2925, 2853, 2793, 1600, 1541, 1527, 1492, 1442, 1380, 1349, 1331, 1259, 1245, 1221, 1174, 1128, 1103, 1049, 1030, 1003, 935, 895, 867, 839, 808, 785, 763, 736, 696, 663  $\text{cm}^{-1}$ ;  $^1\text{H}$  NMR (400 MHz,  $\text{CDCl}_3$ )  $\delta$  7.42 (d,  $J = 7.8$  Hz, 2H), 7.35 (t,  $J = 7.4$  Hz, 2H), 7.16 (t,  $J = 7.1$  Hz, 1H), 4.43 (br d, 1H), 3.56 (s, 3H), 3.11 (s, 6H), 2.99 (s, 3H), 1.83 (m, 2H), 1.71 (m, 3H), 1.44 (m, 4H), 1.15 (m, 1H) ppm;  $^{13}\text{C}$  NMR (100 MHz,  $\text{CDCl}_3$ )  $\delta$  165.7, 165.3, 165.0, 145.4, 127.8, 126.2, 124.1, 53.4, 36.8, 35.6, 29.9, 27.7, 26.0, 25.7 ppm; HRMS (ESI,  $\text{MH}^+$ ) calcd. for  $\text{C}_{19}\text{H}_{29}\text{N}_6$   $m/z$ : 327.2292, found: 327.2288.

Compounds **3<sub>OMe</sub>**, **3<sub>NHMe</sub>** and **3<sub>NMe2</sub>** were synthesized following the same procedure as compound **3<sub>Et</sub>** from 2-methoxy-4,6-dichloro-1,3,5-triazine, 2-methylamino-4,6-dichloro-1,3,5-triazine and 2-dimethylamino-4,6-dichloro-1,3,5-triazine, respectively.

#### Synthesis of 2-methoxy-4,6-bis(N-methylcyclohexylamino)-1,3,5-triazine (**3<sub>OMe</sub>**)

Yield: 66 %;  $T_g$  4 °C,  $T_m$  67 °C; FT-IR (ATR) 2927, 2853, 2803, 1569, 1521, 1491, 1453, 1401, 1378, 1358, 1329, 1258, 1221, 1199, 1167, 1134, 1085, 1049, 998, 894, 870, 811, 753  $\text{cm}^{-1}$ ;  $^1\text{H}$  NMR (400 MHz,  $\text{CDCl}_3$ )  $\delta$  4.56 (br d, 2H), 3.86 (s, 3H), 2.97 (s, 6H), 1.80 (m, 4H), 1.69 (m, 6H), 1.42 (m, 8H), 1.11 (m, 2H) ppm;  $^{13}\text{C}$  NMR (100 MHz,  $\text{CDCl}_3$ )  $\delta$  170.7, 165.9, 54.5, 53.3, 30.0, 28.2, 25.7 ppm; HRMS (ESI,  $\text{MH}^+$ ) calcd. for  $\text{C}_{18}\text{H}_{32}\text{N}_5\text{O}$   $m/z$ : 334.2601, found: 334.2604.

#### Synthesis of 2-methylamino-4,6-bis(N-methylcyclohexylamino)-1,3,5-triazine (**3<sub>NHMe</sub>**)

Yield: 42 %;  $T_g$  32 °C,  $T_m$  94 °C; FT-IR (ATR) 3465, 3279, 3169, 2928, 2853, 2793, 1560, 1528, 1501, 1450, 1399, 1384, 1348, 1327, 1253, 1202, 1154, 1112, 1047, 998, 894, 871, 838, 810, 755  $\text{cm}^{-1}$ ;  $^1\text{H}$  NMR (400 MHz,  $\text{CDCl}_3$ )  $\delta$  4.69 (br s, 1H), 4.53 (br s, 2H), 2.96 (s, 6H), 2.91 (d,  $J = 4.2$  Hz, 3H), 1.81 (m, 4H), 1.69 (m, 6H), 1.41 (m, 8H), 1.12 (m, 2H) ppm;  $^{13}\text{C}$  NMR (100 MHz,  $\text{CDCl}_3$ )  $\delta$  166.8, 165.1, 53.4, 30.0, 27.8, 27.4, 26.1, 25.9 ppm; HRMS (ESI,  $\text{MH}^+$ ) calcd. for  $\text{C}_{18}\text{H}_{33}\text{N}_6$   $m/z$ : 333.2761, found: 333.2768.

#### Synthesis of 2-dimethylamino-4,6-bis(N-methylcyclohexylamino)-1,3,5-triazine (**3<sub>NMe2</sub>**)

Yield: 55 %;  $T_g$  -9 °C,  $T_m$  54 °C; FT-IR (ATR) 2926, 2853, 2791, 1568, 1534, 1491, 1449, 1395, 1348, 1330, 1310, 1260, 1246, 1209, 1172, 1123, 1047, 1006, 982, 894, 867, 842, 808, 739, 675  $\text{cm}^{-1}$ ;  $^1\text{H}$  NMR (400 MHz,  $\text{CDCl}_3$ )  $\delta$  4.54 (br s, 2H), 3.09 (s, 6H), 2.97 (s, 6H), 1.81 (m, 4H), 1.70 (m, 6H), 1.42 (m, 8H), 1.13 (m, 2H) ppm;  $^{13}\text{C}$  NMR (100 MHz,  $\text{CDCl}_3$ )  $\delta$  165.9, 165.2, 53.5, 36.3, 35.7, 30.0, 27.8, 26.2, 25.9 ppm; HRMS (ESI,  $\text{MH}^+$ ) calcd. for  $\text{C}_{19}\text{H}_{35}\text{N}_6$   $m/z$ : 347.2918, found: 347.2923.

**Table S1. Crystallographic parameters for single crystals of compounds **3<sub>Et</sub>**, **3<sub>OMe</sub>**, **2<sub>NMe2</sub>**, and **3<sub>NMe2</sub>**, crystallized by slow evaporation from methanol or from chloroform.**

| <b>Compound</b>                             | <b>3<sub>Et</sub></b>                          | <b>3<sub>OMe</sub></b>                           | <b>2<sub>NMe2</sub></b>                        | <b>3<sub>NMe2</sub></b>                        |
|---------------------------------------------|------------------------------------------------|--------------------------------------------------|------------------------------------------------|------------------------------------------------|
| <b>Molecular Formula</b>                    | C <sub>19</sub> H <sub>33</sub> N <sub>5</sub> | C <sub>18</sub> H <sub>31</sub> N <sub>5</sub> O | C <sub>19</sub> H <sub>28</sub> N <sub>6</sub> | C <sub>19</sub> H <sub>34</sub> N <sub>6</sub> |
| <b>M (g/mol)</b>                            | 331.50                                         | 333.48                                           | 340.47                                         | 346.52                                         |
| <b>Space Group</b>                          | <i>Pbca</i>                                    | <i>Pbca</i>                                      | <i>Pca2<sub>1</sub></i>                        | <i>P2<sub>1</sub>/m</i>                        |
| <b>a (Å)</b>                                | 15.0700(3)                                     | 14.7113(3)                                       | 14.6085(5)                                     | 5.7373(3)                                      |
| <b>b (Å)</b>                                | 10.3551(2)                                     | 10.5414(2)                                       | 12.2750(4)                                     | 30.1441(16)                                    |
| <b>c (Å)</b>                                | 24.4042(5)                                     | 24.3585(6)                                       | 10.4746(4)                                     | 6.1322(3)                                      |
| <b>β (°)</b>                                | 90                                             | 90                                               | 90                                             | 109.223(3)                                     |
| <b>V (Å<sup>3</sup>)</b>                    | 3808.31(13)                                    | 3777.46(14)                                      | 1878.30(11)                                    | 1001.41(9)                                     |
| <b>Z</b>                                    | 8                                              | 8                                                | 4                                              | 2                                              |
| <b>F(000)</b>                               | 1456                                           | 1456                                             | 736                                            | 380                                            |
| <b>ρ<sub>calc</sub> (g cm<sup>-3</sup>)</b> | 1.156                                          | 1.173                                            | 1.204                                          | 1.149                                          |
| <b>T (K)</b>                                | 150                                            | 150                                              | 150                                            | 150                                            |
| <b>Radiation</b>                            | GaK <sub>α</sub>                               | GaK <sub>α</sub>                                 | GaK <sub>α</sub>                               | GaK <sub>α</sub>                               |
| <b>λ (Å)</b>                                | 1.34139                                        | 1.34139                                          | 1.34139                                        | 1.34139                                        |
| <b>μ (mm<sup>-1</sup>)</b>                  | 0.347                                          | 0.379                                            | 0.375                                          | 0.352                                          |
| <b>Measured Refl.</b>                       | 34870                                          | 30234                                            | 15250                                          | 12348                                          |
| <b>Ind. Refl.</b>                           | 4386                                           | 4341                                             | 1836                                           | 1861                                           |
| <b>R<sub>int</sub></b>                      | 0.0379                                         | 0.0273                                           | 0.0978                                         | 0.0752                                         |
| <b>R<sub>σ</sub></b>                        | 0.0227                                         | 0.0176                                           | 0.0316                                         | 0.0407                                         |
| <b>Obs. Refl.</b>                           | 3894                                           | 4124                                             | 1570                                           | 1244                                           |
| <b>R<sub>1</sub> (I &gt; 2σ)</b>            | 0.0451                                         | 0.0470                                           | 0.0795                                         | 0.0768                                         |
| <b>wR<sub>2</sub> (I &gt; 2σ)</b>           | 0.1125                                         | 0.1181                                           | 0.1938                                         | 0.2032                                         |
| <b>R<sub>1</sub> (all data)</b>             | 0.0505                                         | 0.0484                                           | 0.0915                                         | 0.1088                                         |
| <b>wR<sub>2</sub> (all data)</b>            | 0.1173                                         | 0.1199                                           | 0.2022                                         | 0.2351                                         |
| <b>GOF</b>                                  | 1.065                                          | 1.095                                            | 1.175                                          | 1.062                                          |
| <b>Packing Index (%)</b>                    | 67.6                                           | 66.5                                             | 67.4                                           | 66.2                                           |

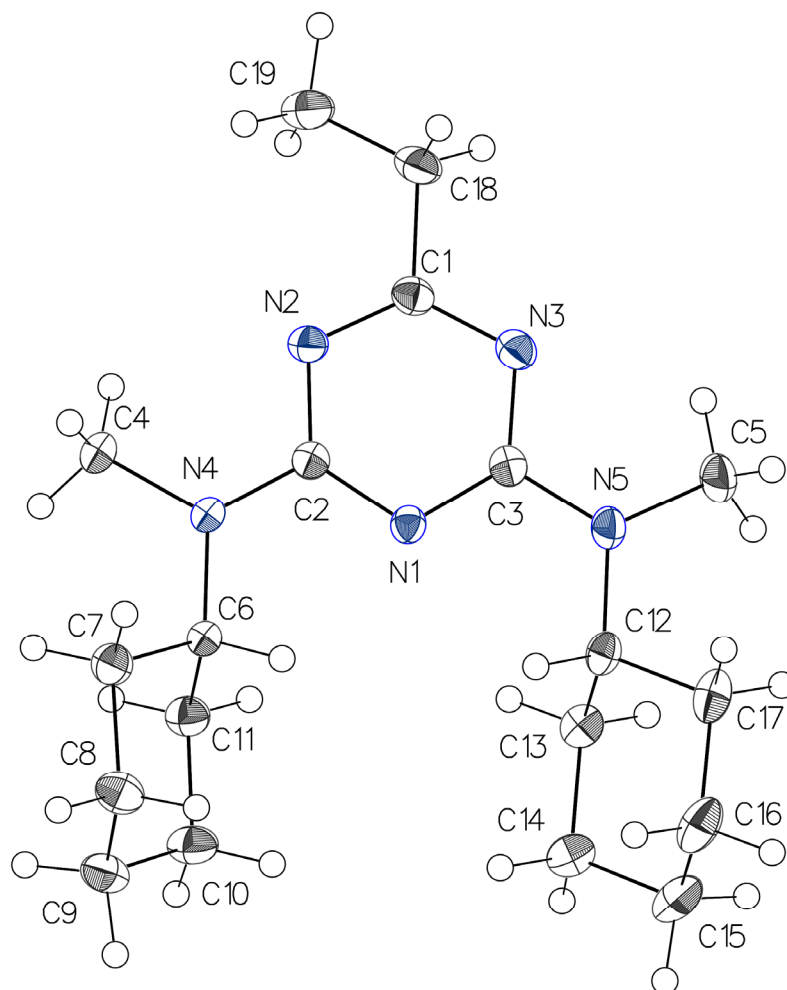

**Figure S1.** Thermal atomic displacement ellipsoid plot of the structure of **3Et**. The ellipsoids of non-hydrogen atoms are drawn at the 50% probability level, and hydrogen atoms are represented by a sphere of arbitrary size.

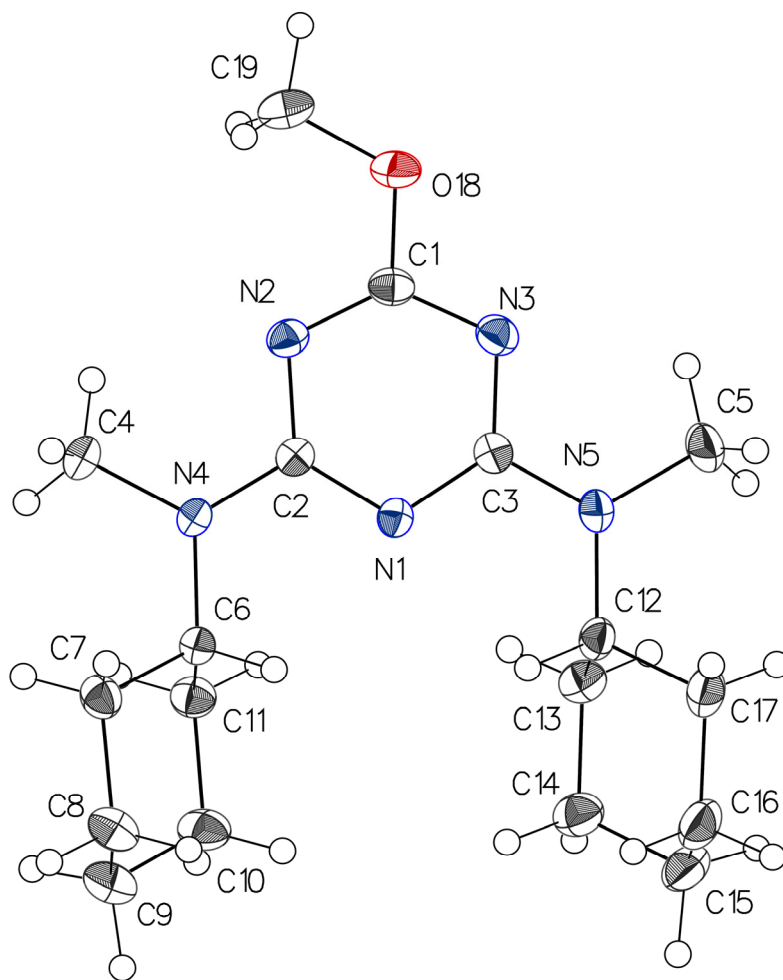

**Figure S2.** Thermal atomic displacement ellipsoid plot of the structure of **3<sub>OMe</sub>**. The ellipsoids of non-hydrogen atoms are drawn at the 50% probability level, and hydrogen atoms are represented by a sphere of arbitrary size.

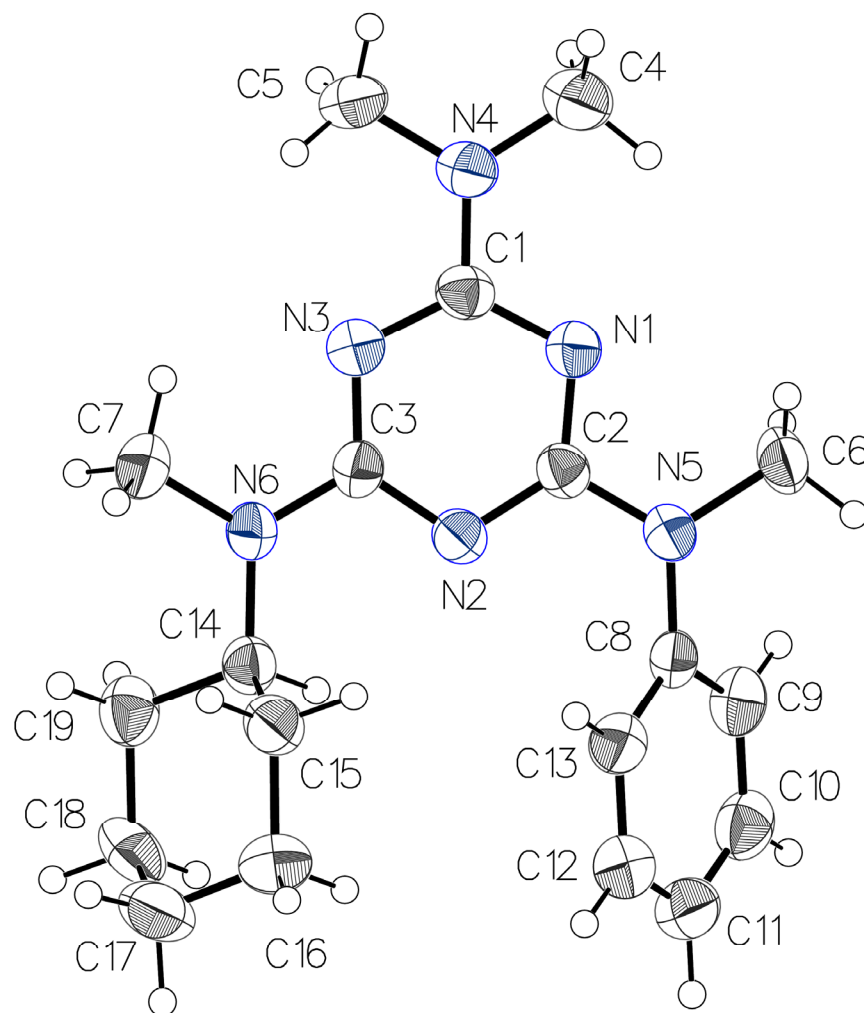

**Figure S3.** Thermal atomic displacement ellipsoid plot of the structure of **2<sub>NMe<sub>2</sub></sub>**. The ellipsoids of non-hydrogen atoms are drawn at the 50% probability level, and hydrogen atoms are represented by a sphere of arbitrary size.

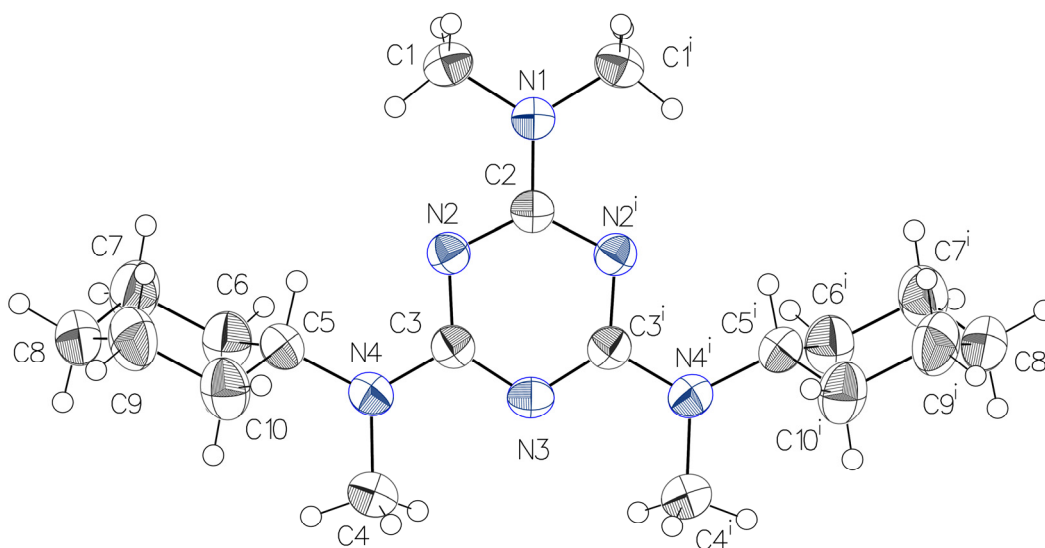

**Figure S4.** Thermal atomic displacement ellipsoid plot of the structure of  $3_{\text{NMe}_2}$ . The ellipsoids of non-hydrogen atoms are drawn at the 50% probability level, and hydrogen atoms are represented by a sphere of arbitrary size.



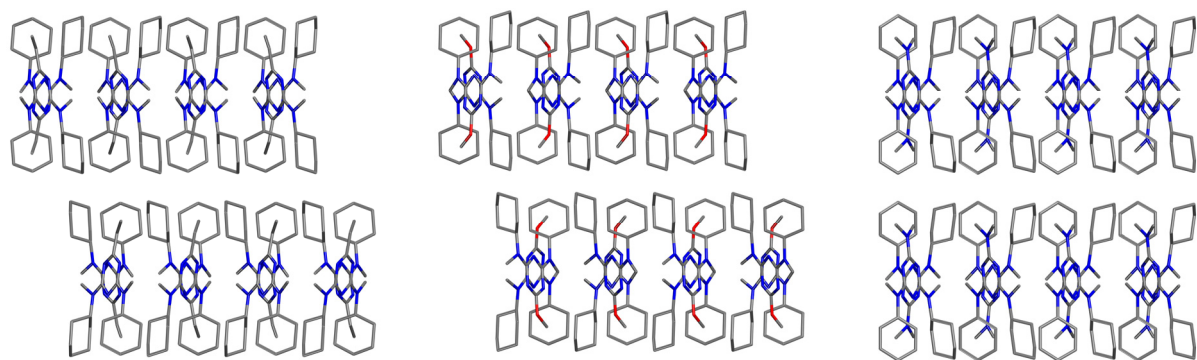

**3<sub>Et</sub>** along the *a*-axis

**3<sub>OMe</sub>** along the *a*-axis

**2<sub>NMe2</sub>** along the *a*-axis

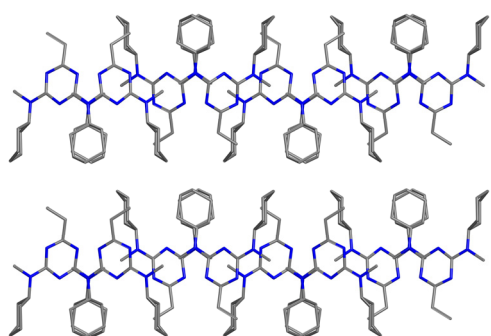

**3<sub>Et</sub>** along the *b*-axis

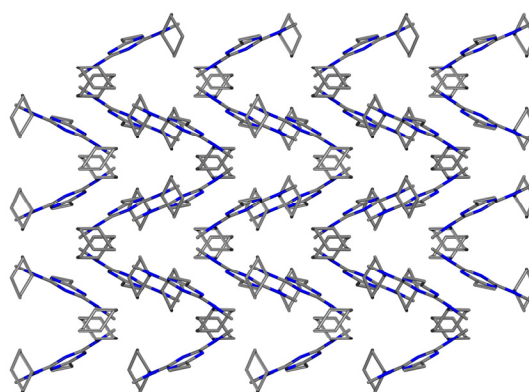

**3<sub>Et</sub>** along the *c*-axis

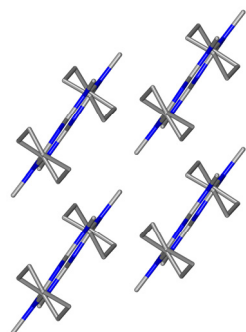

**3<sub>NMe2</sub>** along the *b*-axis

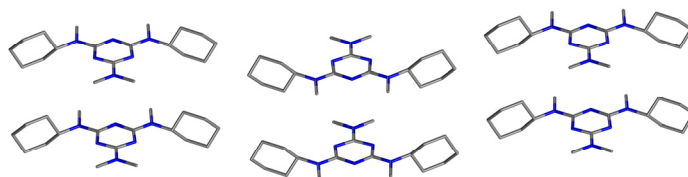

**3<sub>NMe2</sub>** along the *c*-axis

**Figure S5.** Different view of the crystal structures of **3<sub>Et</sub>**, **3<sub>OMe</sub>**, **2<sub>NMe2</sub>** and **3<sub>NMe2</sub>**

**Table S2.** Relative energy (kJ/mol) for the three stable conformers of **1<sub>HG</sub>** and **3<sub>HG</sub>**. Top and bottom refer to the conformations of the ancillary groups along or opposite to the headgroup, respectively.

| Compound              | Conformation  | HG = Et | HG = OMe | HG = NMe <sub>2</sub> | HG = NHMe |
|-----------------------|---------------|---------|----------|-----------------------|-----------|
| <b>1<sub>HG</sub></b> | bottom-bottom | 0       | 0.9      | 1.7                   | 0.4       |
|                       | top-bottom    | 0.4     | 0        | 0.6                   | 0         |
|                       | top-top       | 1.5     | 1.8      | 0                     | 0.2       |
| <b>3<sub>HG</sub></b> | bottom-bottom | 3.1     | 2.4      | 0.1                   | 1.3       |
|                       | top-bottom    | 1.2     | 1.1      | 0                     | 0.2       |
|                       | top-top       | 0       | 0        | 0.8                   | 0         |

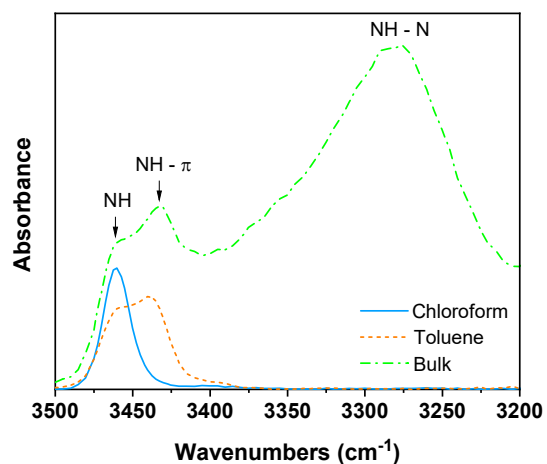

**Figure S6.** IR spectra of **2<sub>NHMe</sub>** in the bulk state, and in 1 mM solutions in toluene and chloroform. The bands due to NH groups engaged in hydrogen bonding (NH – N), NH – π interactions, and weak van der Waals interactions (NH) are indicated.

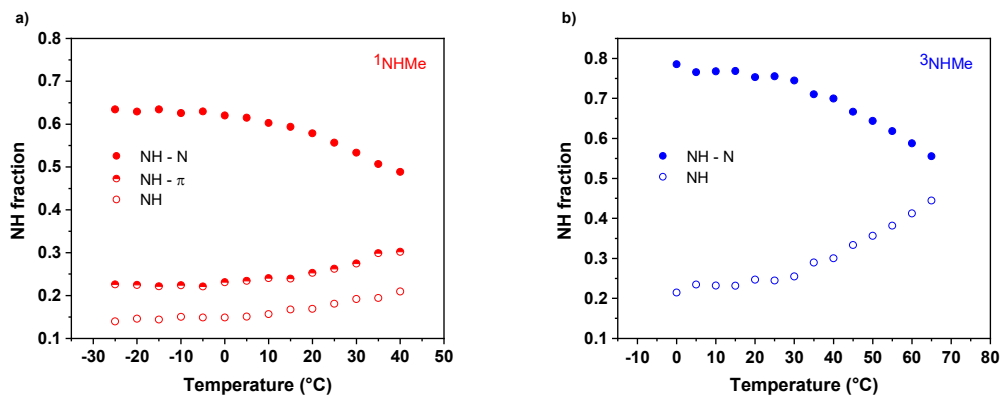

**Figure S7.** Fractions of NH groups engaged in hydrogen bonding (NH – N), NH –  $\pi$  interactions, and weak van der Waals interactions (NH) as a function of temperature for compounds a)  $1_{\text{NHMe}}$  and b)  $3_{\text{NHMe}}$ , as determined by IR spectroscopy and chemometrics analysis.

**Table S3.** Average fraction of bonded NH ( $\pm$  standard deviation for three measurements) at different temperatures relative to  $T_g$  for the compounds studied by variable-temperature IR spectroscopy.

| Compound          | Temperature ( $^{\circ}\text{C}$ ) | NH – N             | NH – $\pi$         | NH                 |
|-------------------|------------------------------------|--------------------|--------------------|--------------------|
| $1_{\text{NHMe}}$ | $T_g + 33$                         | 0.49<br>$\pm 0.01$ | 0.30<br>$\pm 0.01$ | 0.21<br>$\pm 0.02$ |
|                   | $T_g - 2$                          | 0.61<br>$\pm 0.04$ | 0.23<br>$\pm 0.01$ | 0.15<br>$\pm 0.03$ |
|                   | $T_g - 32$                         | 0.63<br>$\pm 0.04$ | 0.23<br>$\pm 0.02$ | 0.14<br>$\pm 0.03$ |
| $2_{\text{NHMe}}$ | $T_g + 33$                         | 0.49<br>$\pm 0.03$ | 0.29<br>$\pm 0.07$ | 0.23<br>$\pm 0.09$ |
|                   | $T_g - 2$                          | 0.66<br>$\pm 0.02$ | 0.20<br>$\pm 0.06$ | 0.14<br>$\pm 0.04$ |
|                   | $T_g - 32$                         | 0.70<br>$\pm 0.03$ | 0.18<br>$\pm 0.06$ | 0.11<br>$\pm 0.04$ |
| $3_{\text{NHMe}}$ | $T_g + 33$                         | 0.56<br>$\pm 0.04$ | –                  | 0.44<br>$\pm 0.04$ |
|                   | $T_g - 2$                          | 0.74<br>$\pm 0.04$ | –                  | 0.26<br>$\pm 0.04$ |
|                   | $T_g - 32$                         | 0.79<br>$\pm 0.03$ | –                  | 0.21<br>$\pm 0.03$ |

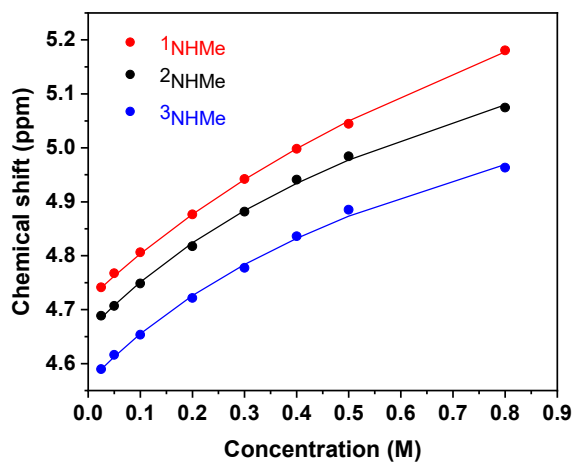

**Figure S8.** Evolution of NH peak chemical shift with concentration in  $\text{CDCl}_3$  for  $1_{\text{NHMe}}$ ,  $2_{\text{NHMe}}$  and  $3_{\text{NHMe}}$ , fitted to a curve using a monomer–dimer model (lines).[1]

## Reference

1. K.M. Psutka and K.E. Maly, *RSC Adv.*, 2016, **6**, 78784-78790.

## NMR Spectra of Compounds 1-5

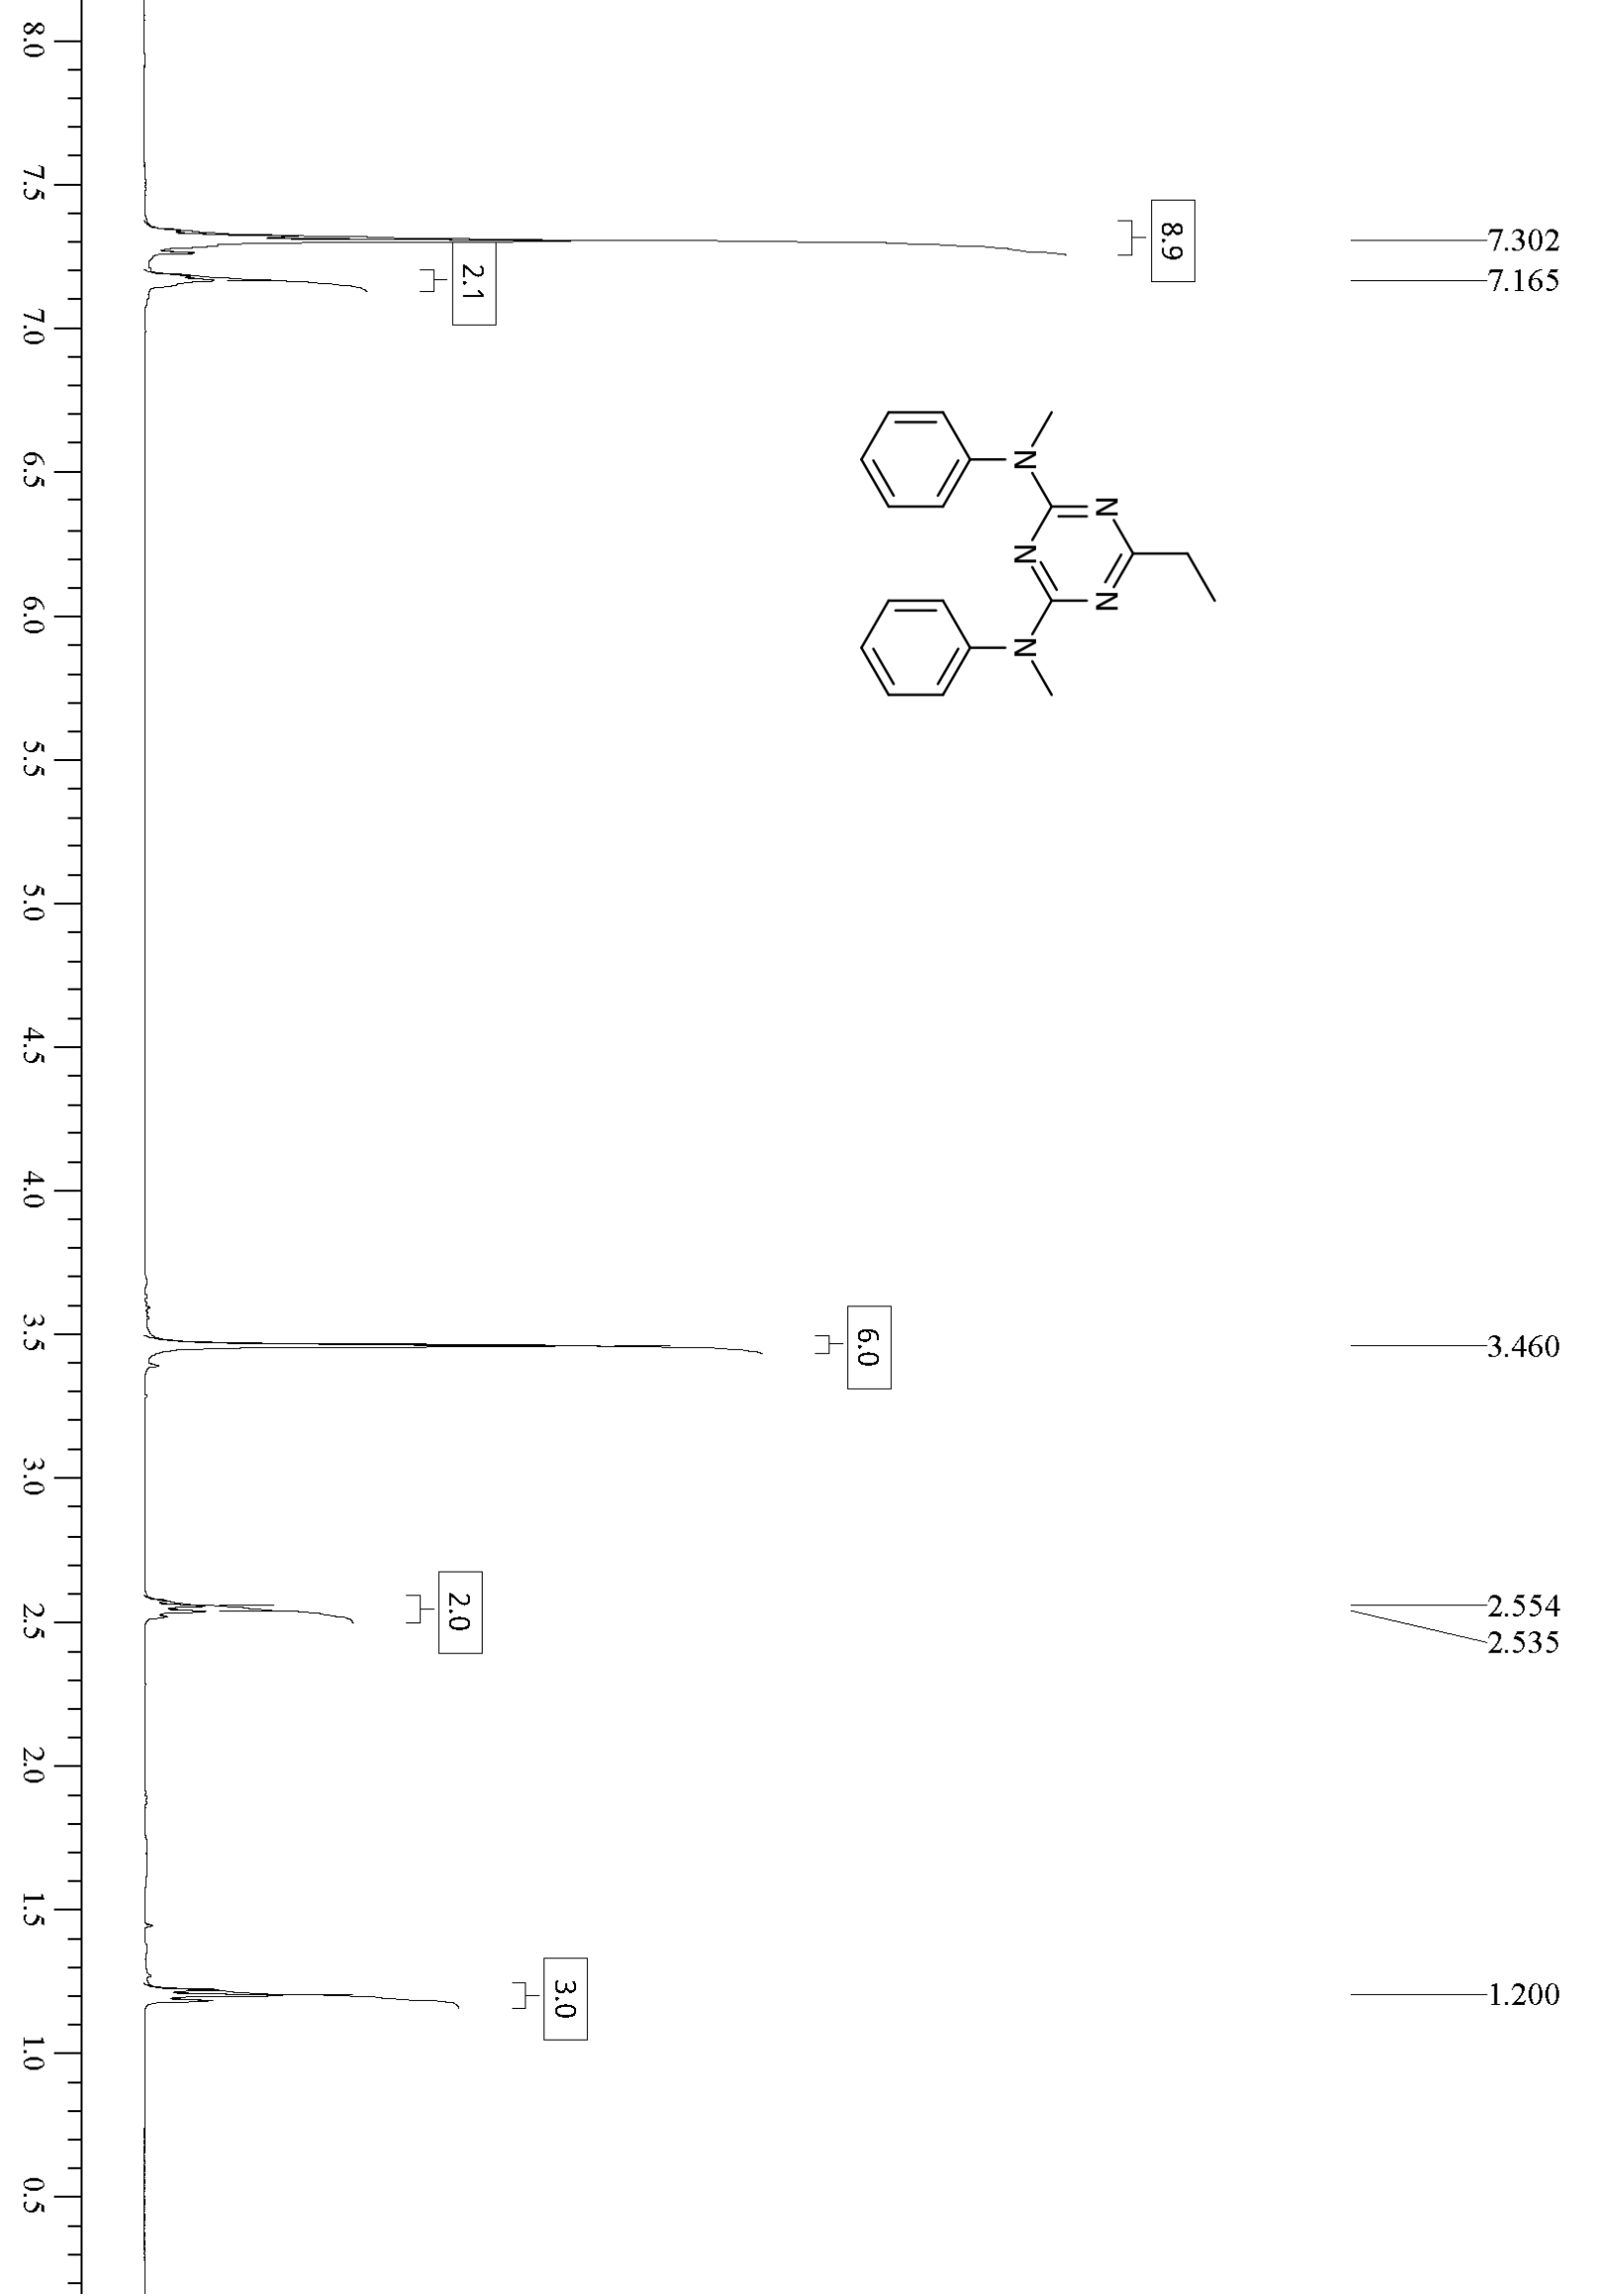

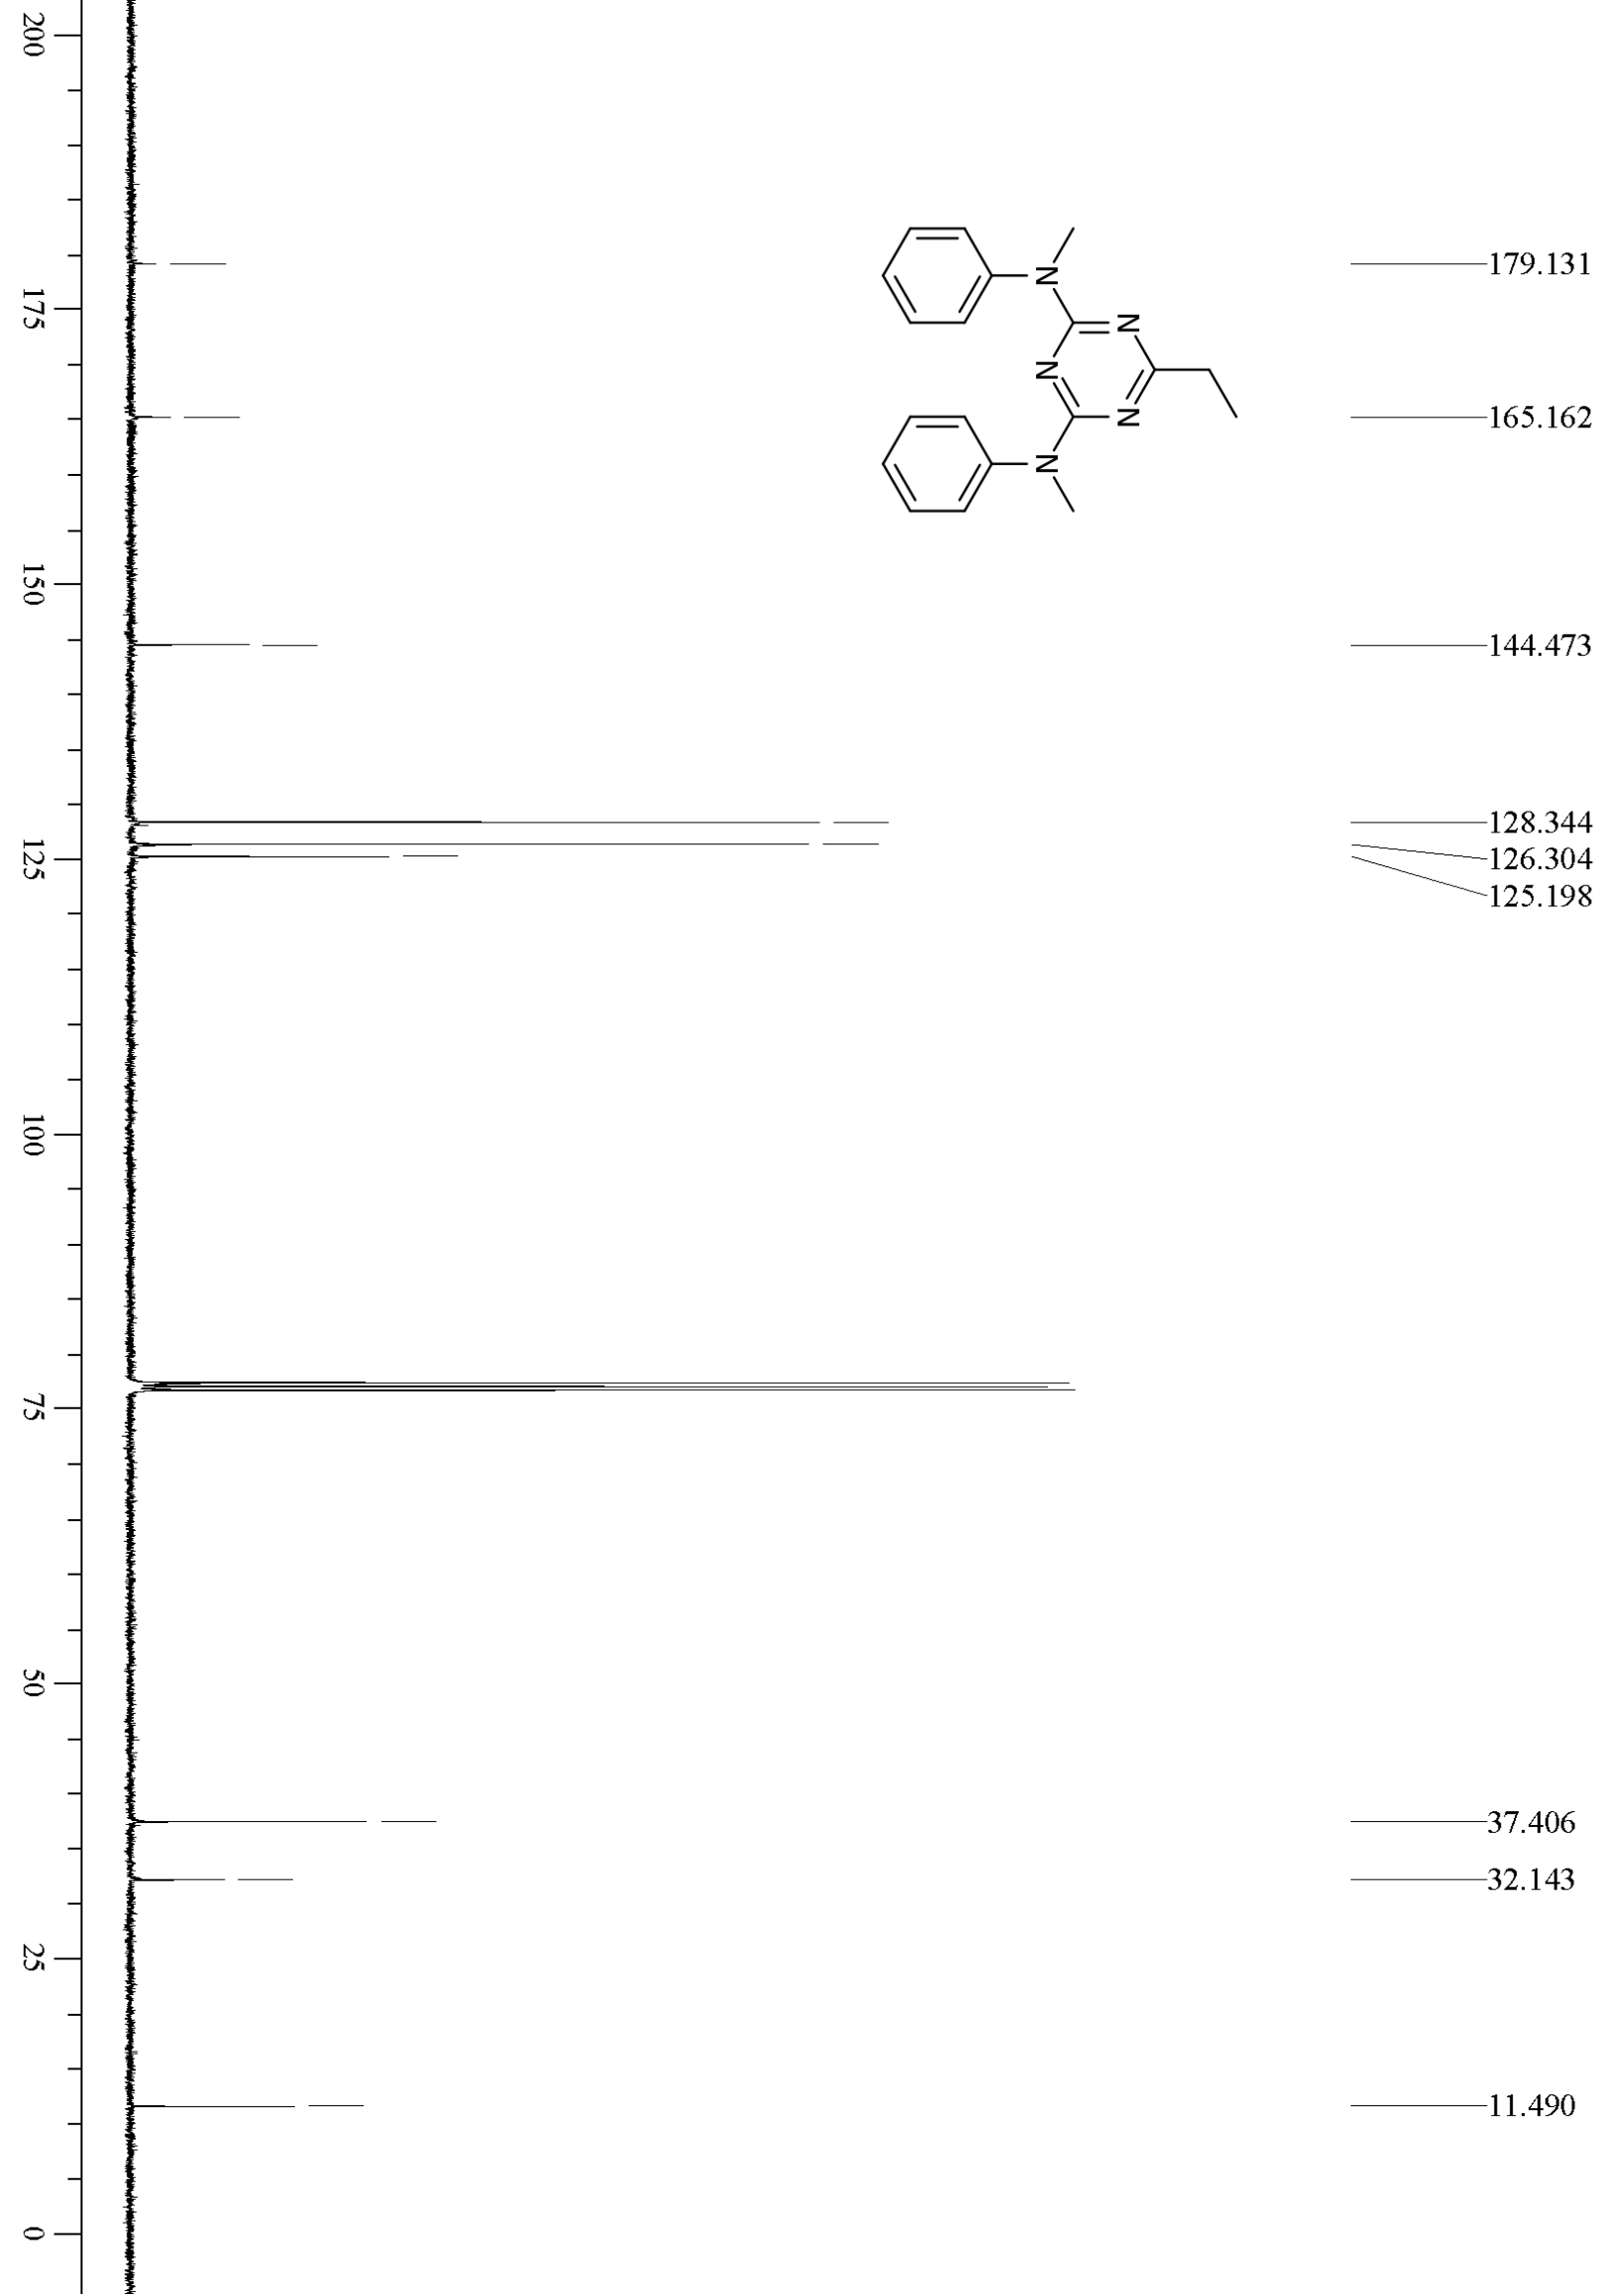

7.335  
7.134

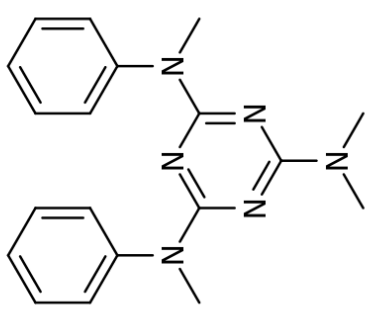

3.468  
3.021

8.0  
7.5  
7.0  
6.5  
6.0  
5.5  
5.0  
4.5  
4.0  
3.5  
3.0  
2.5  
2.0  
1.5  
1.0  
0.5

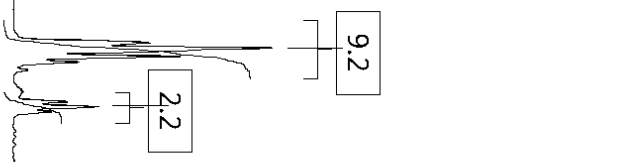

9.2

2.2

6.0

6.0

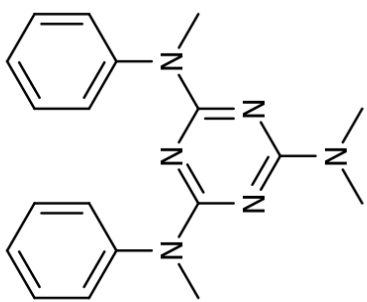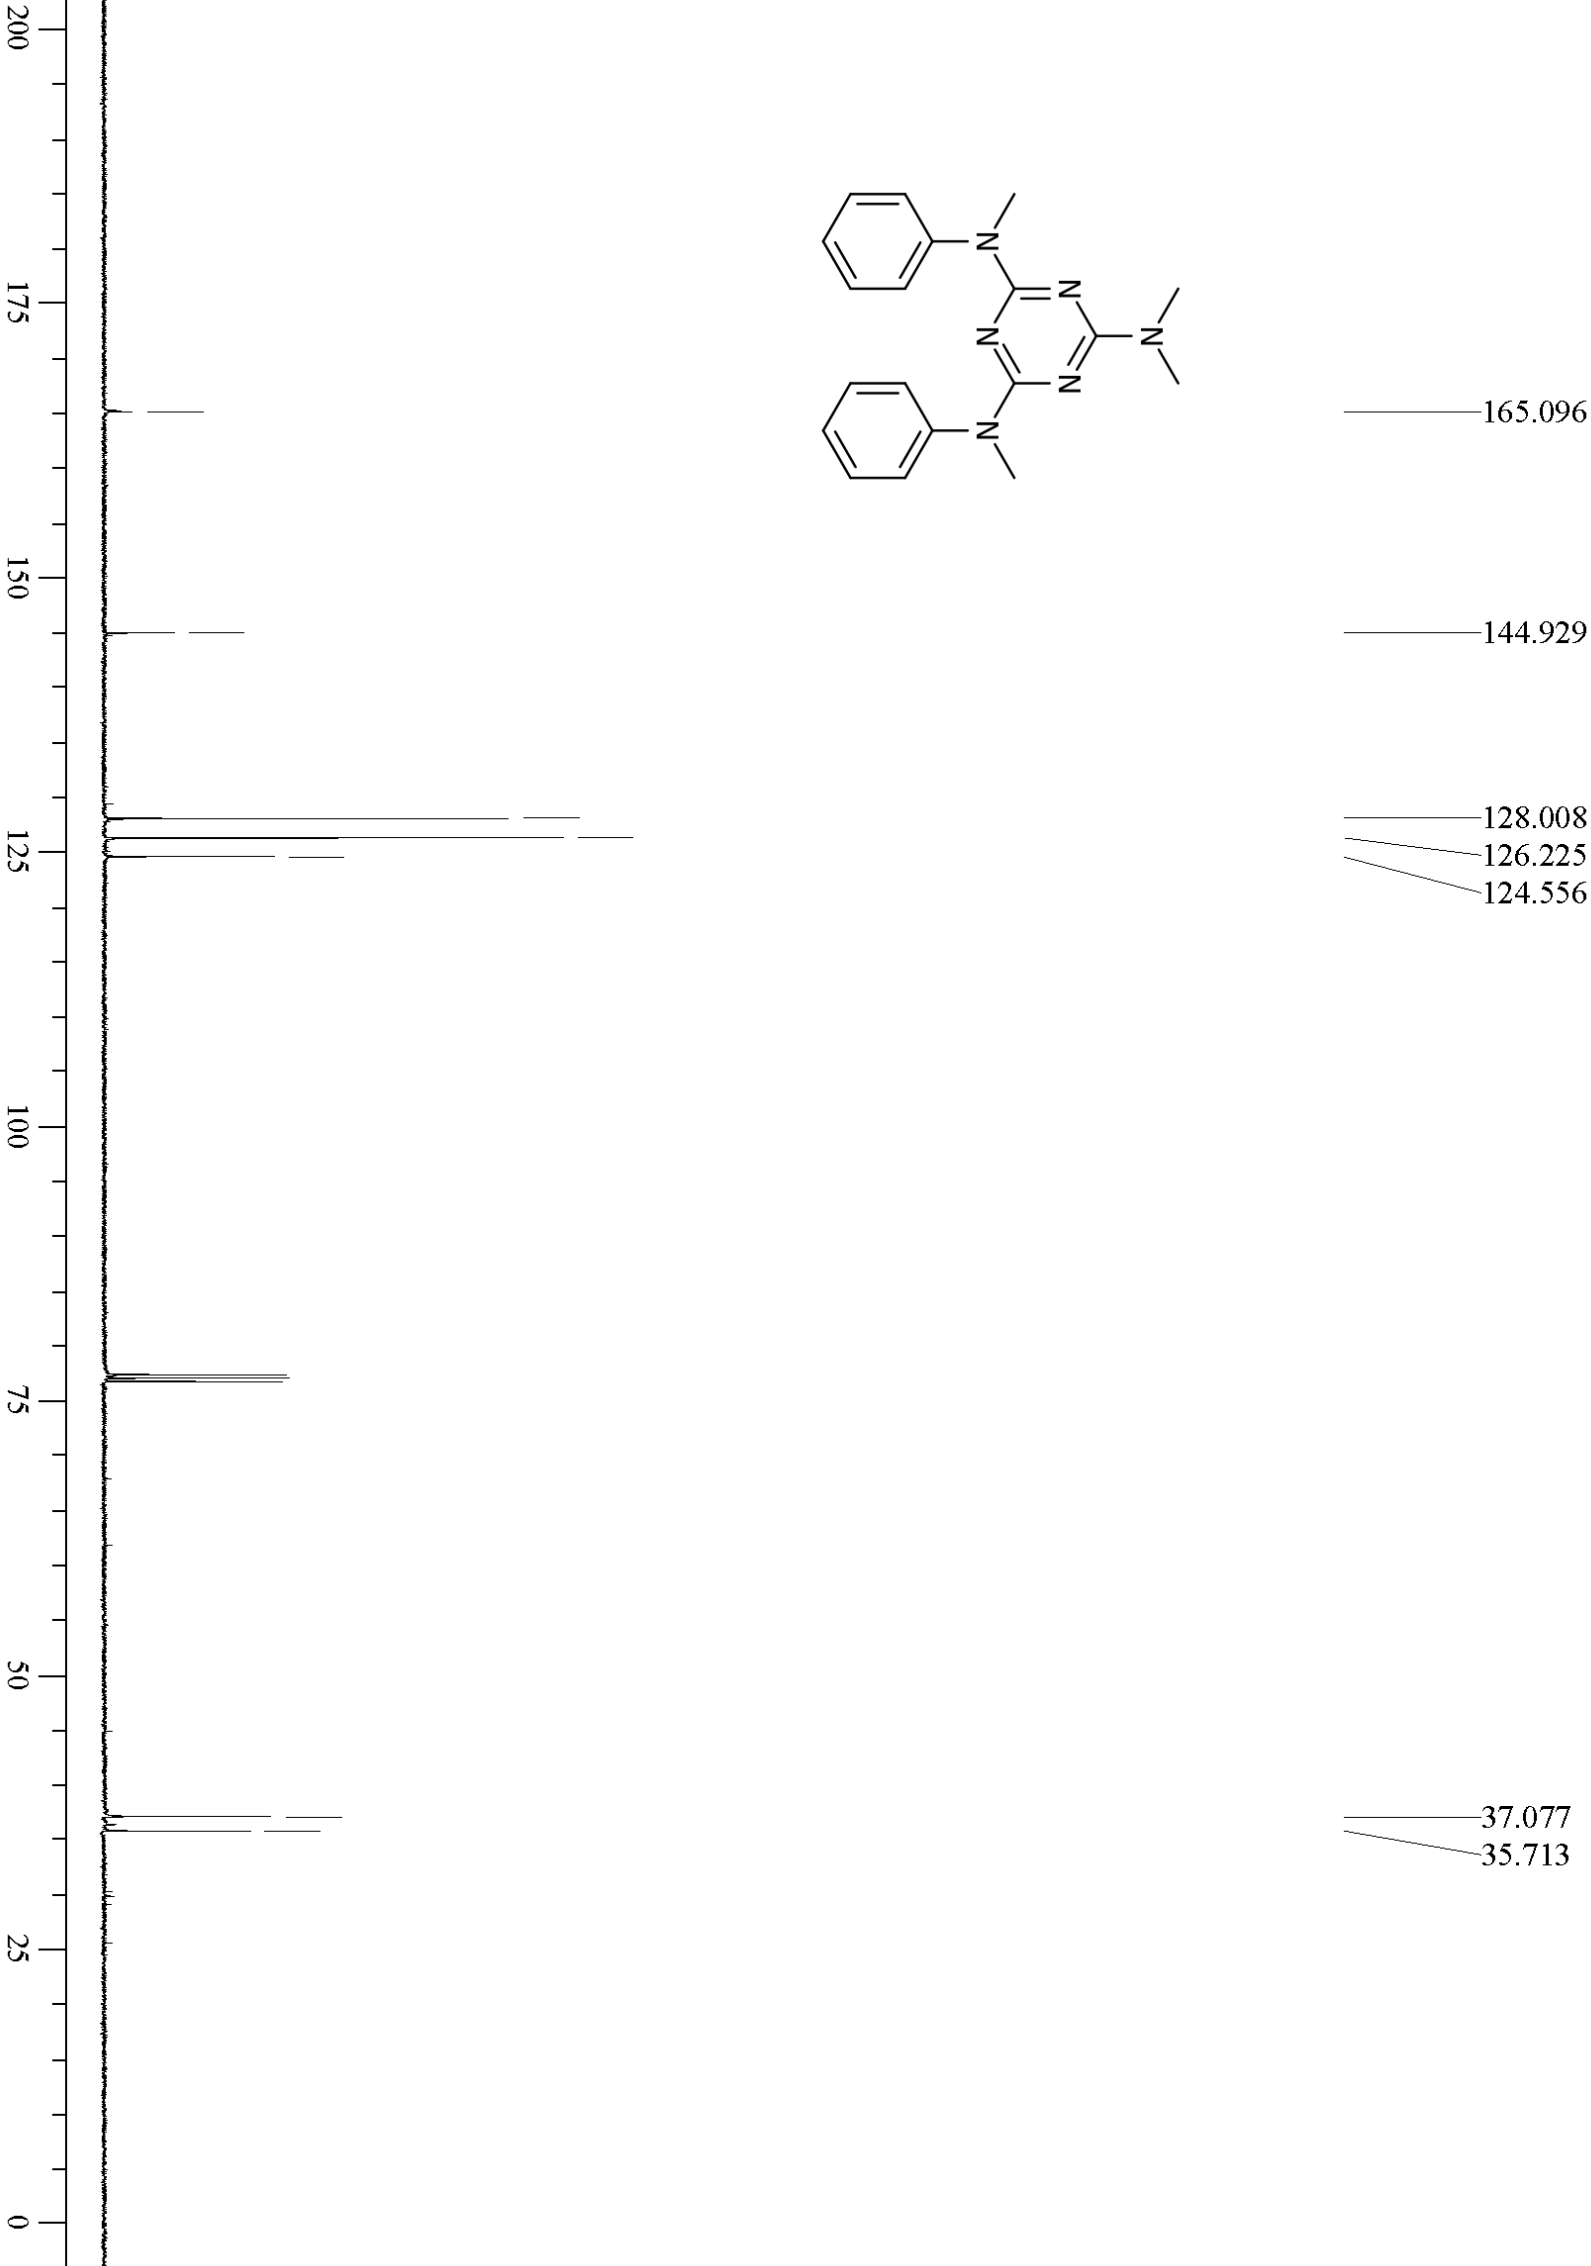



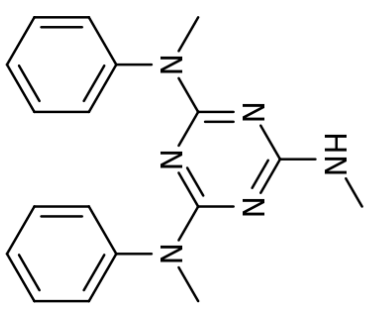

7.343  
7.166

4.902

3.465

2.836

8.0  
7.5  
7.0  
6.5  
6.0  
5.5  
5.0  
4.5  
4.0  
3.5  
3.0  
2.5  
2.0  
1.5  
1.0  
0.5

7.9

2.2

0.9

5.9

3.0

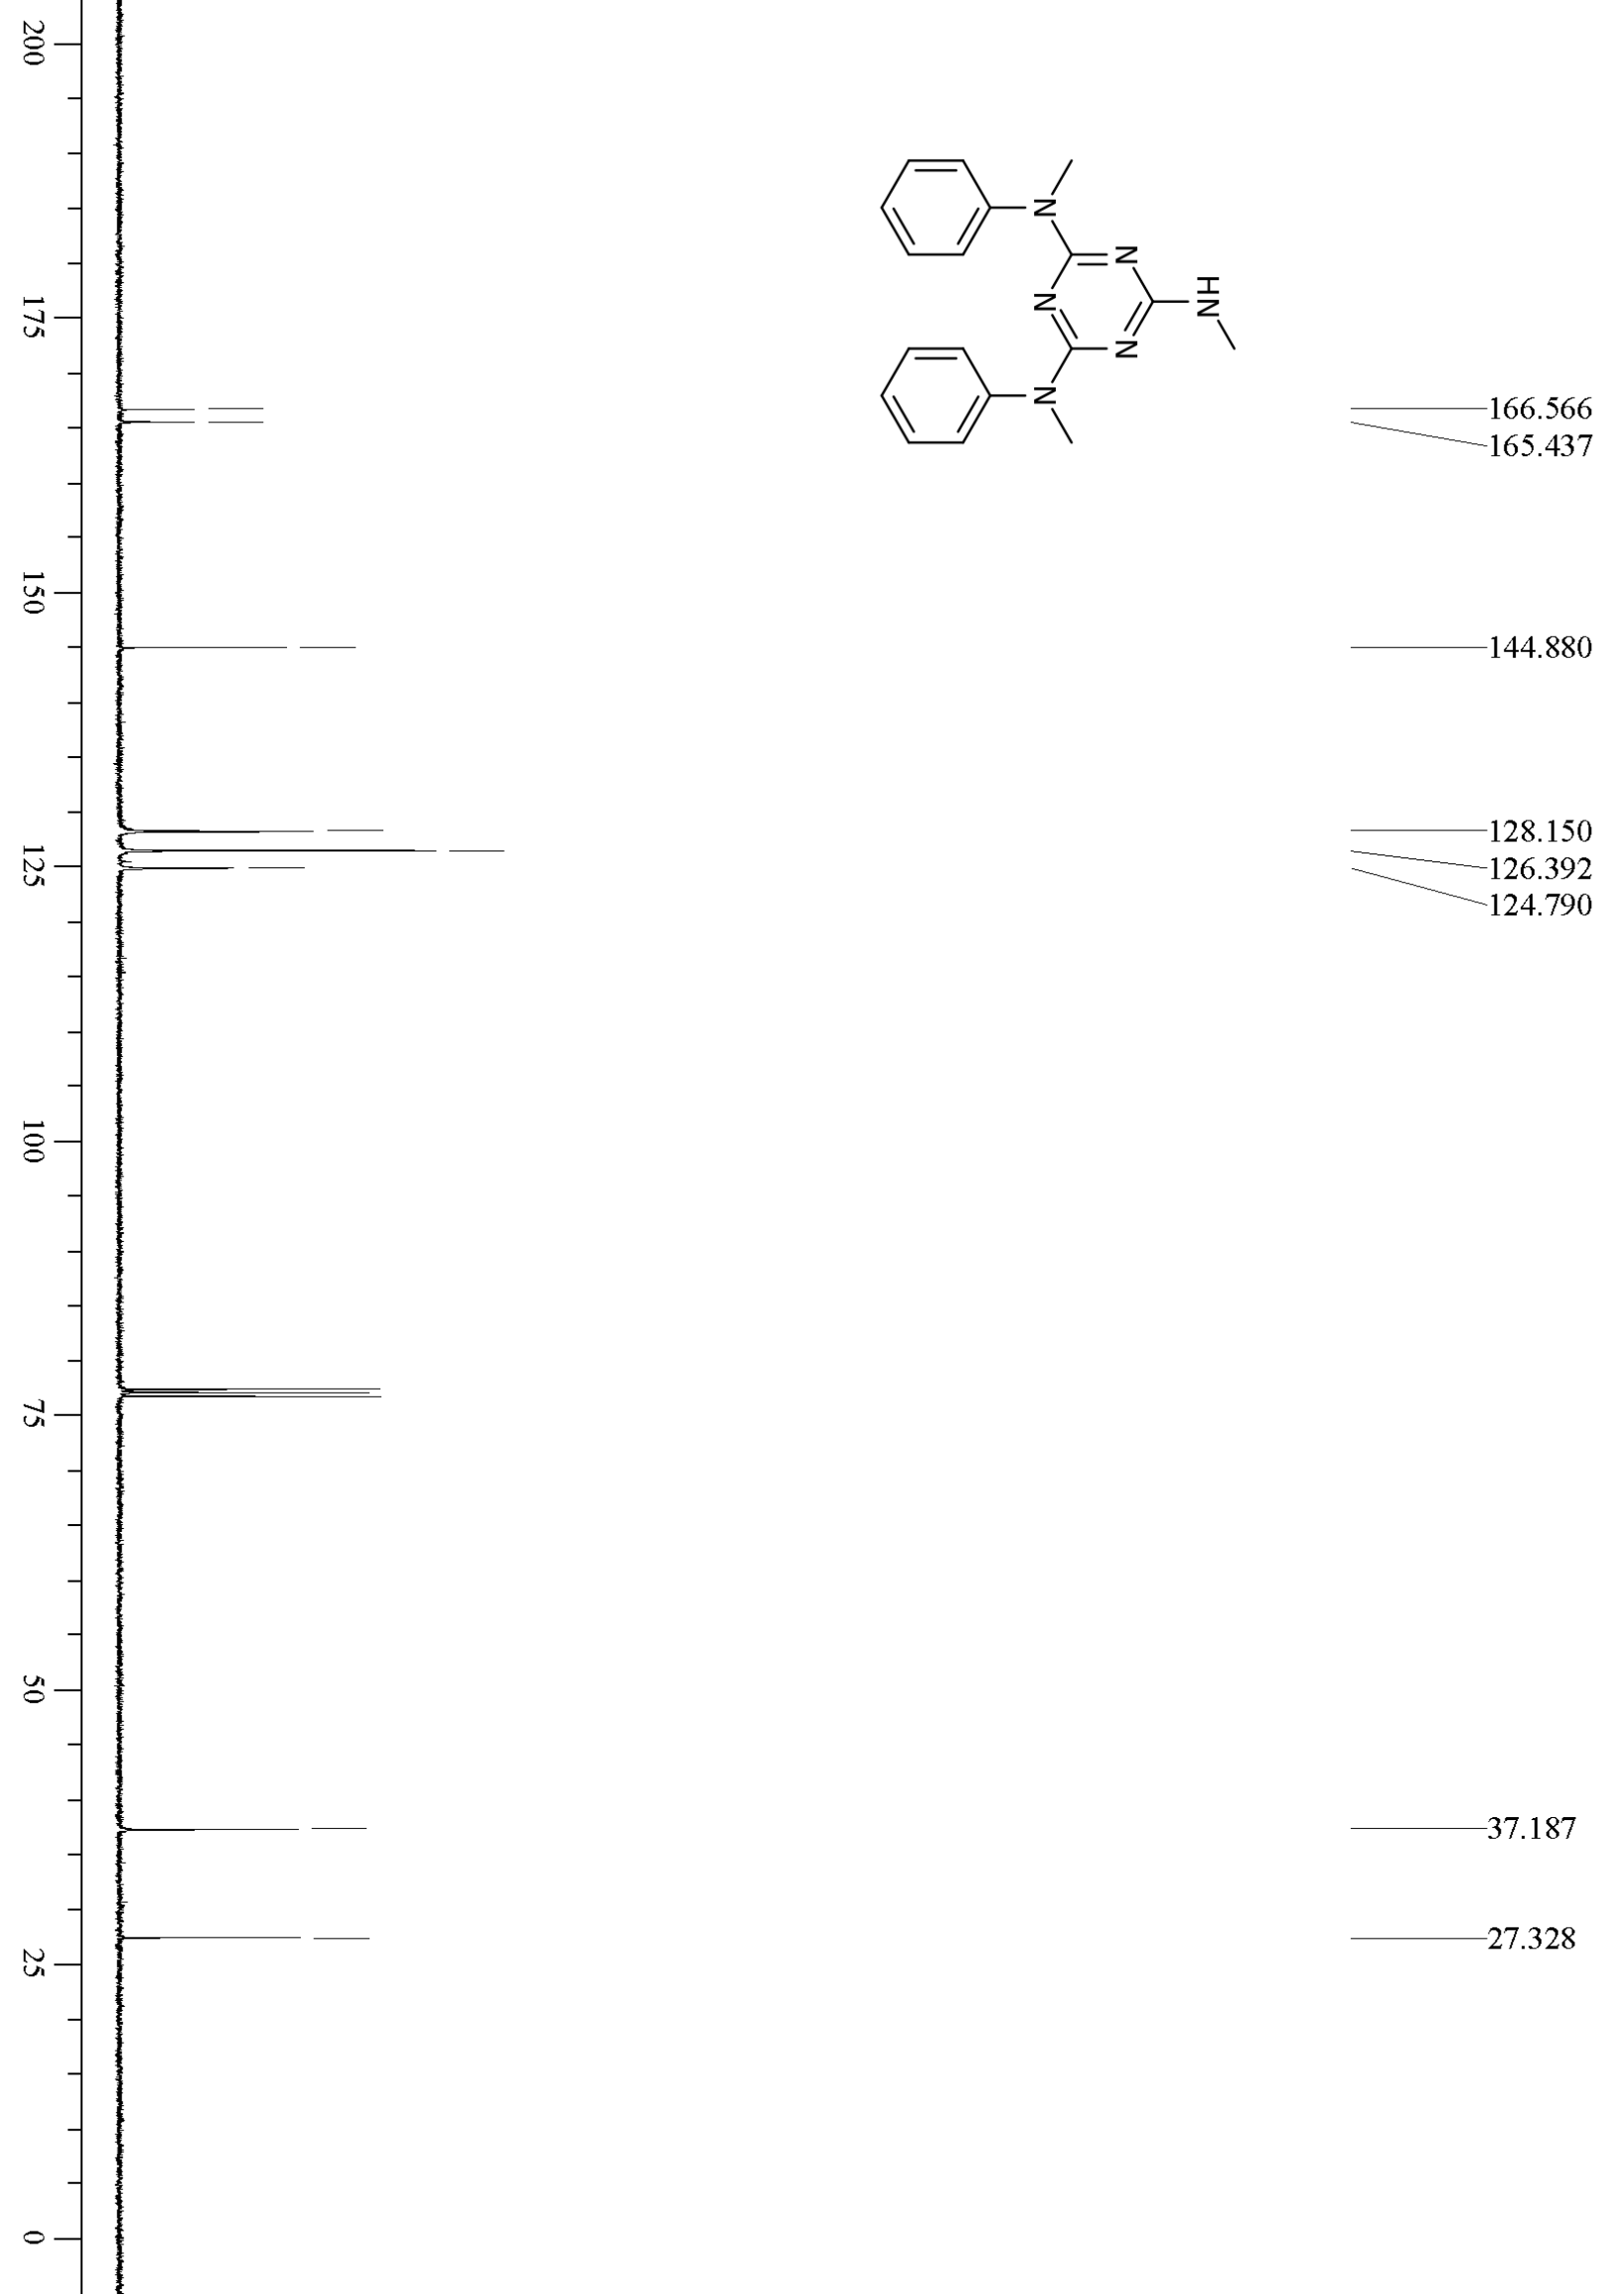

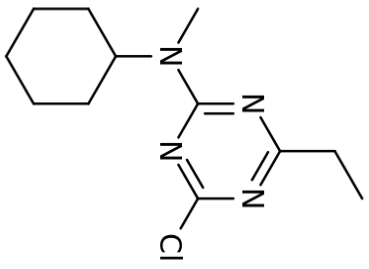

363 K

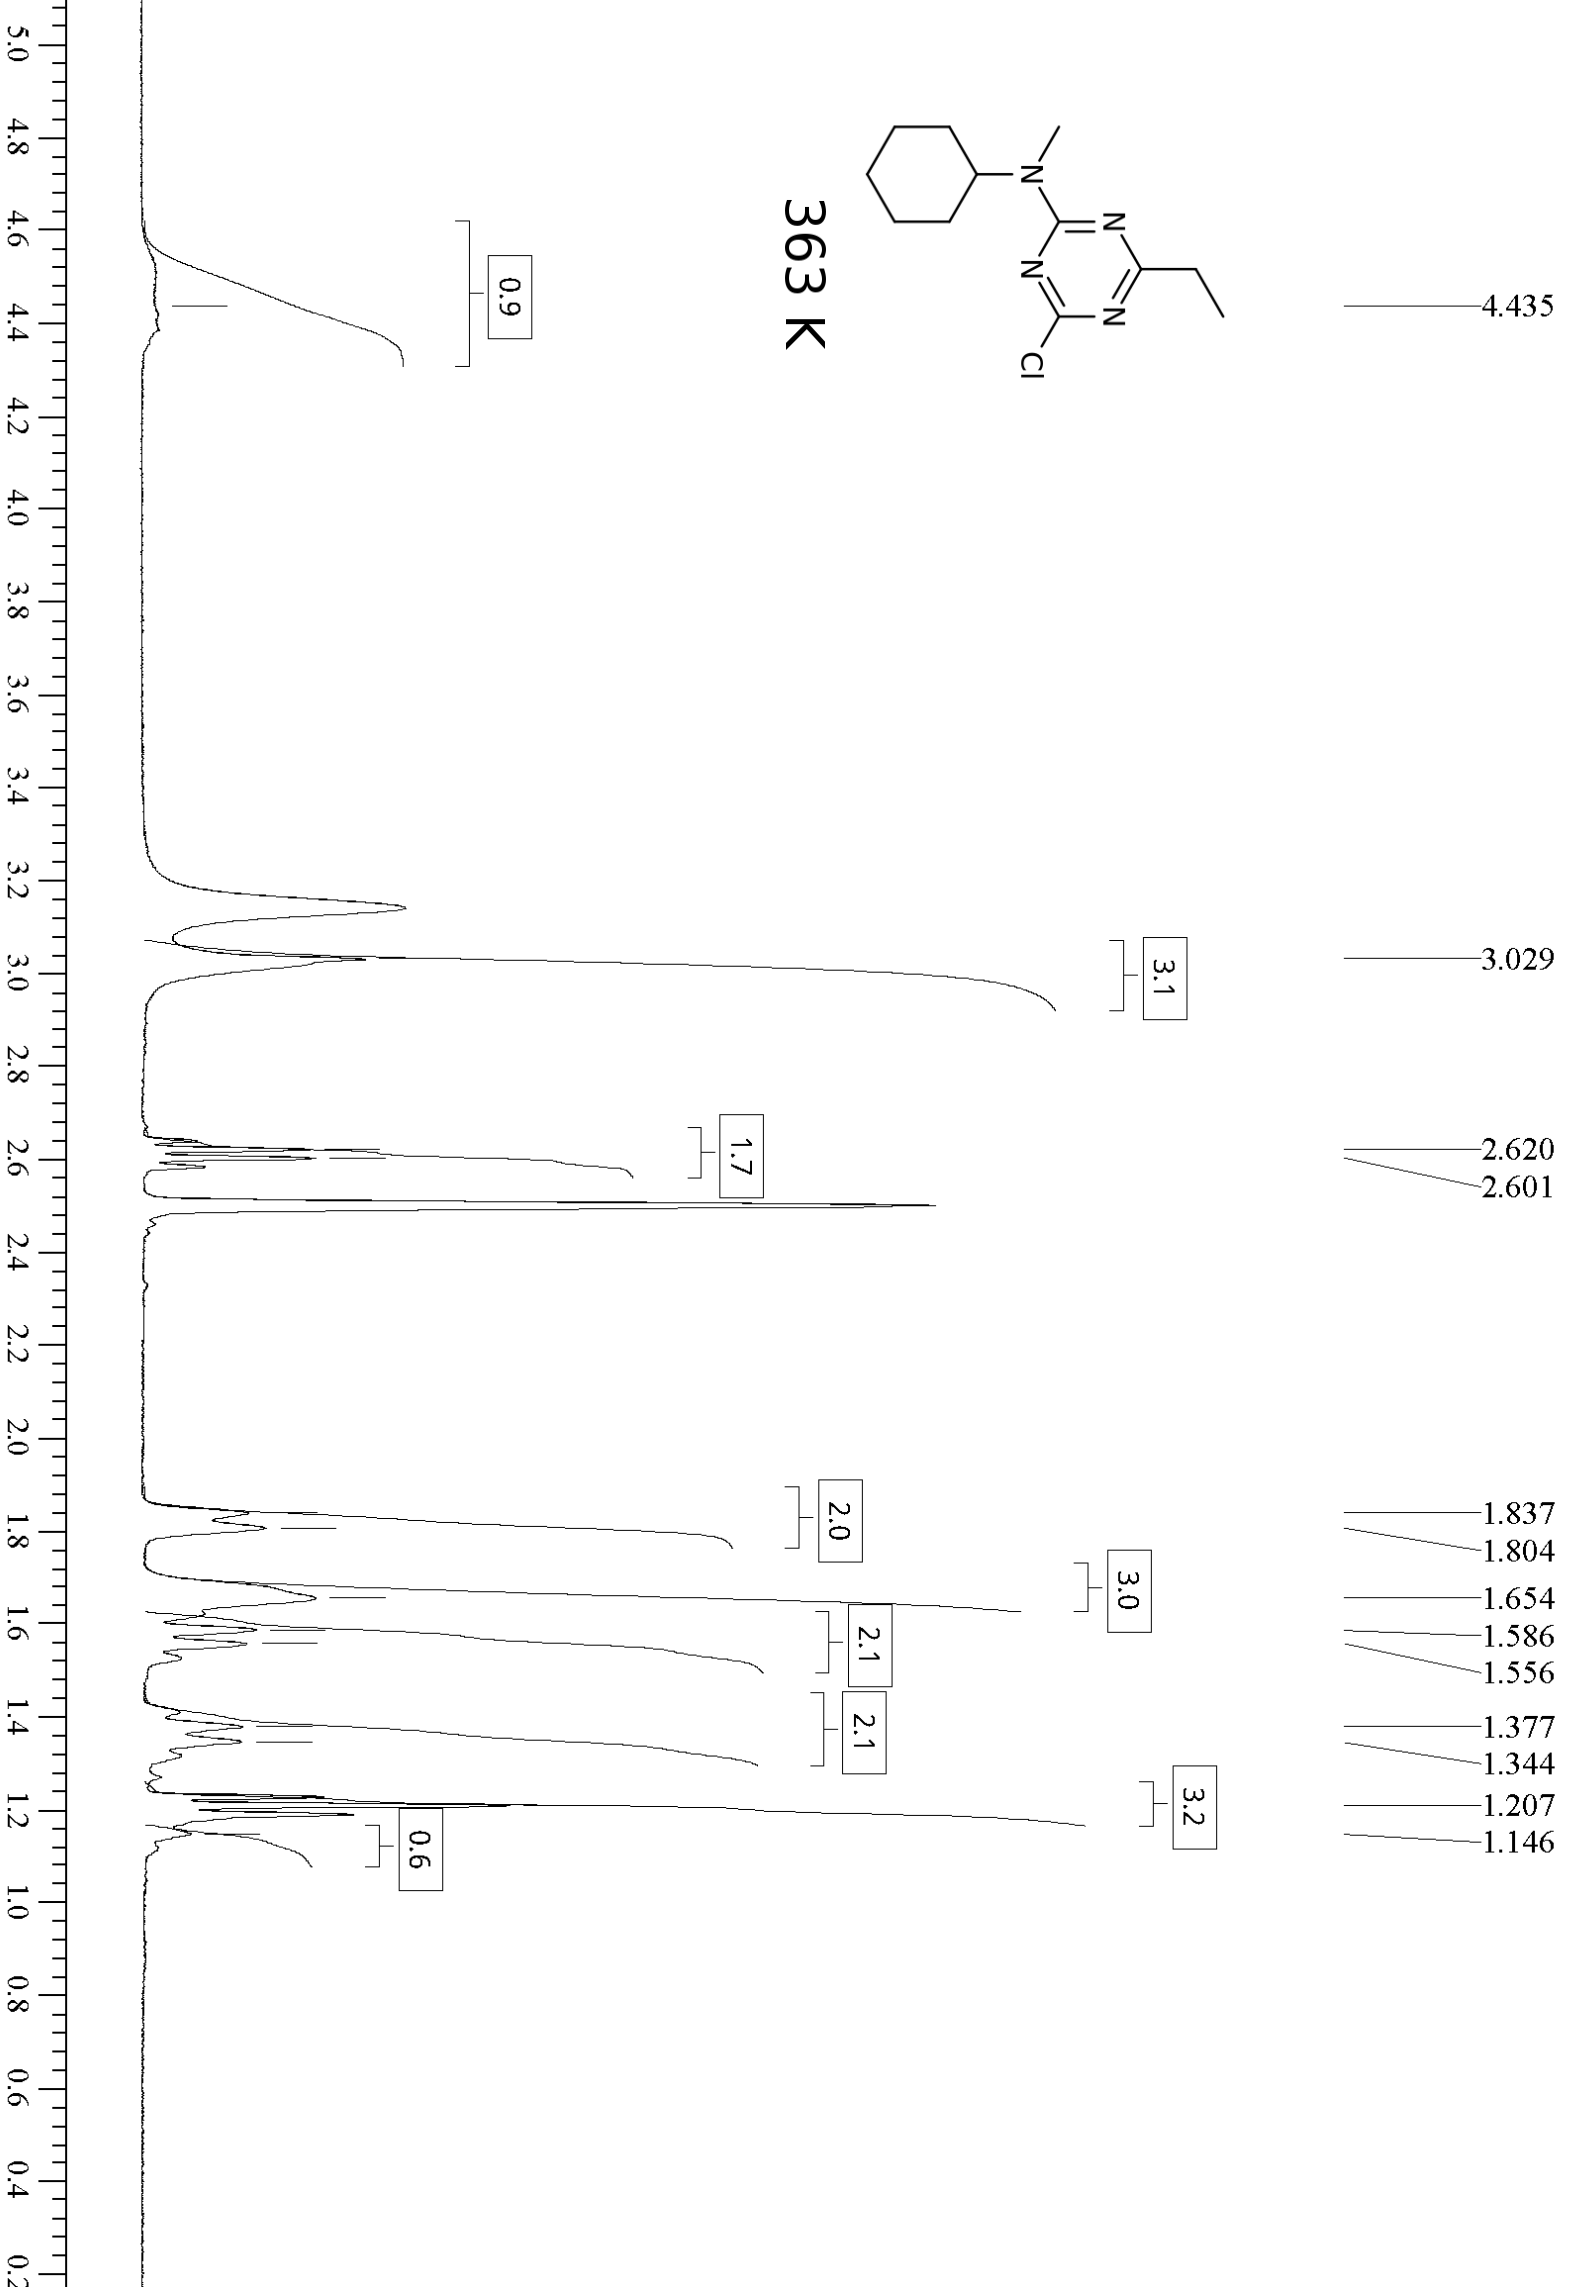

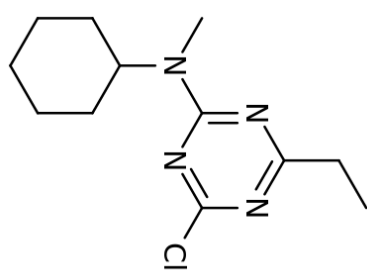

180.349

169.658

164.519

54.663

54.136

31.714

29.622

28.733

25.430

11.250

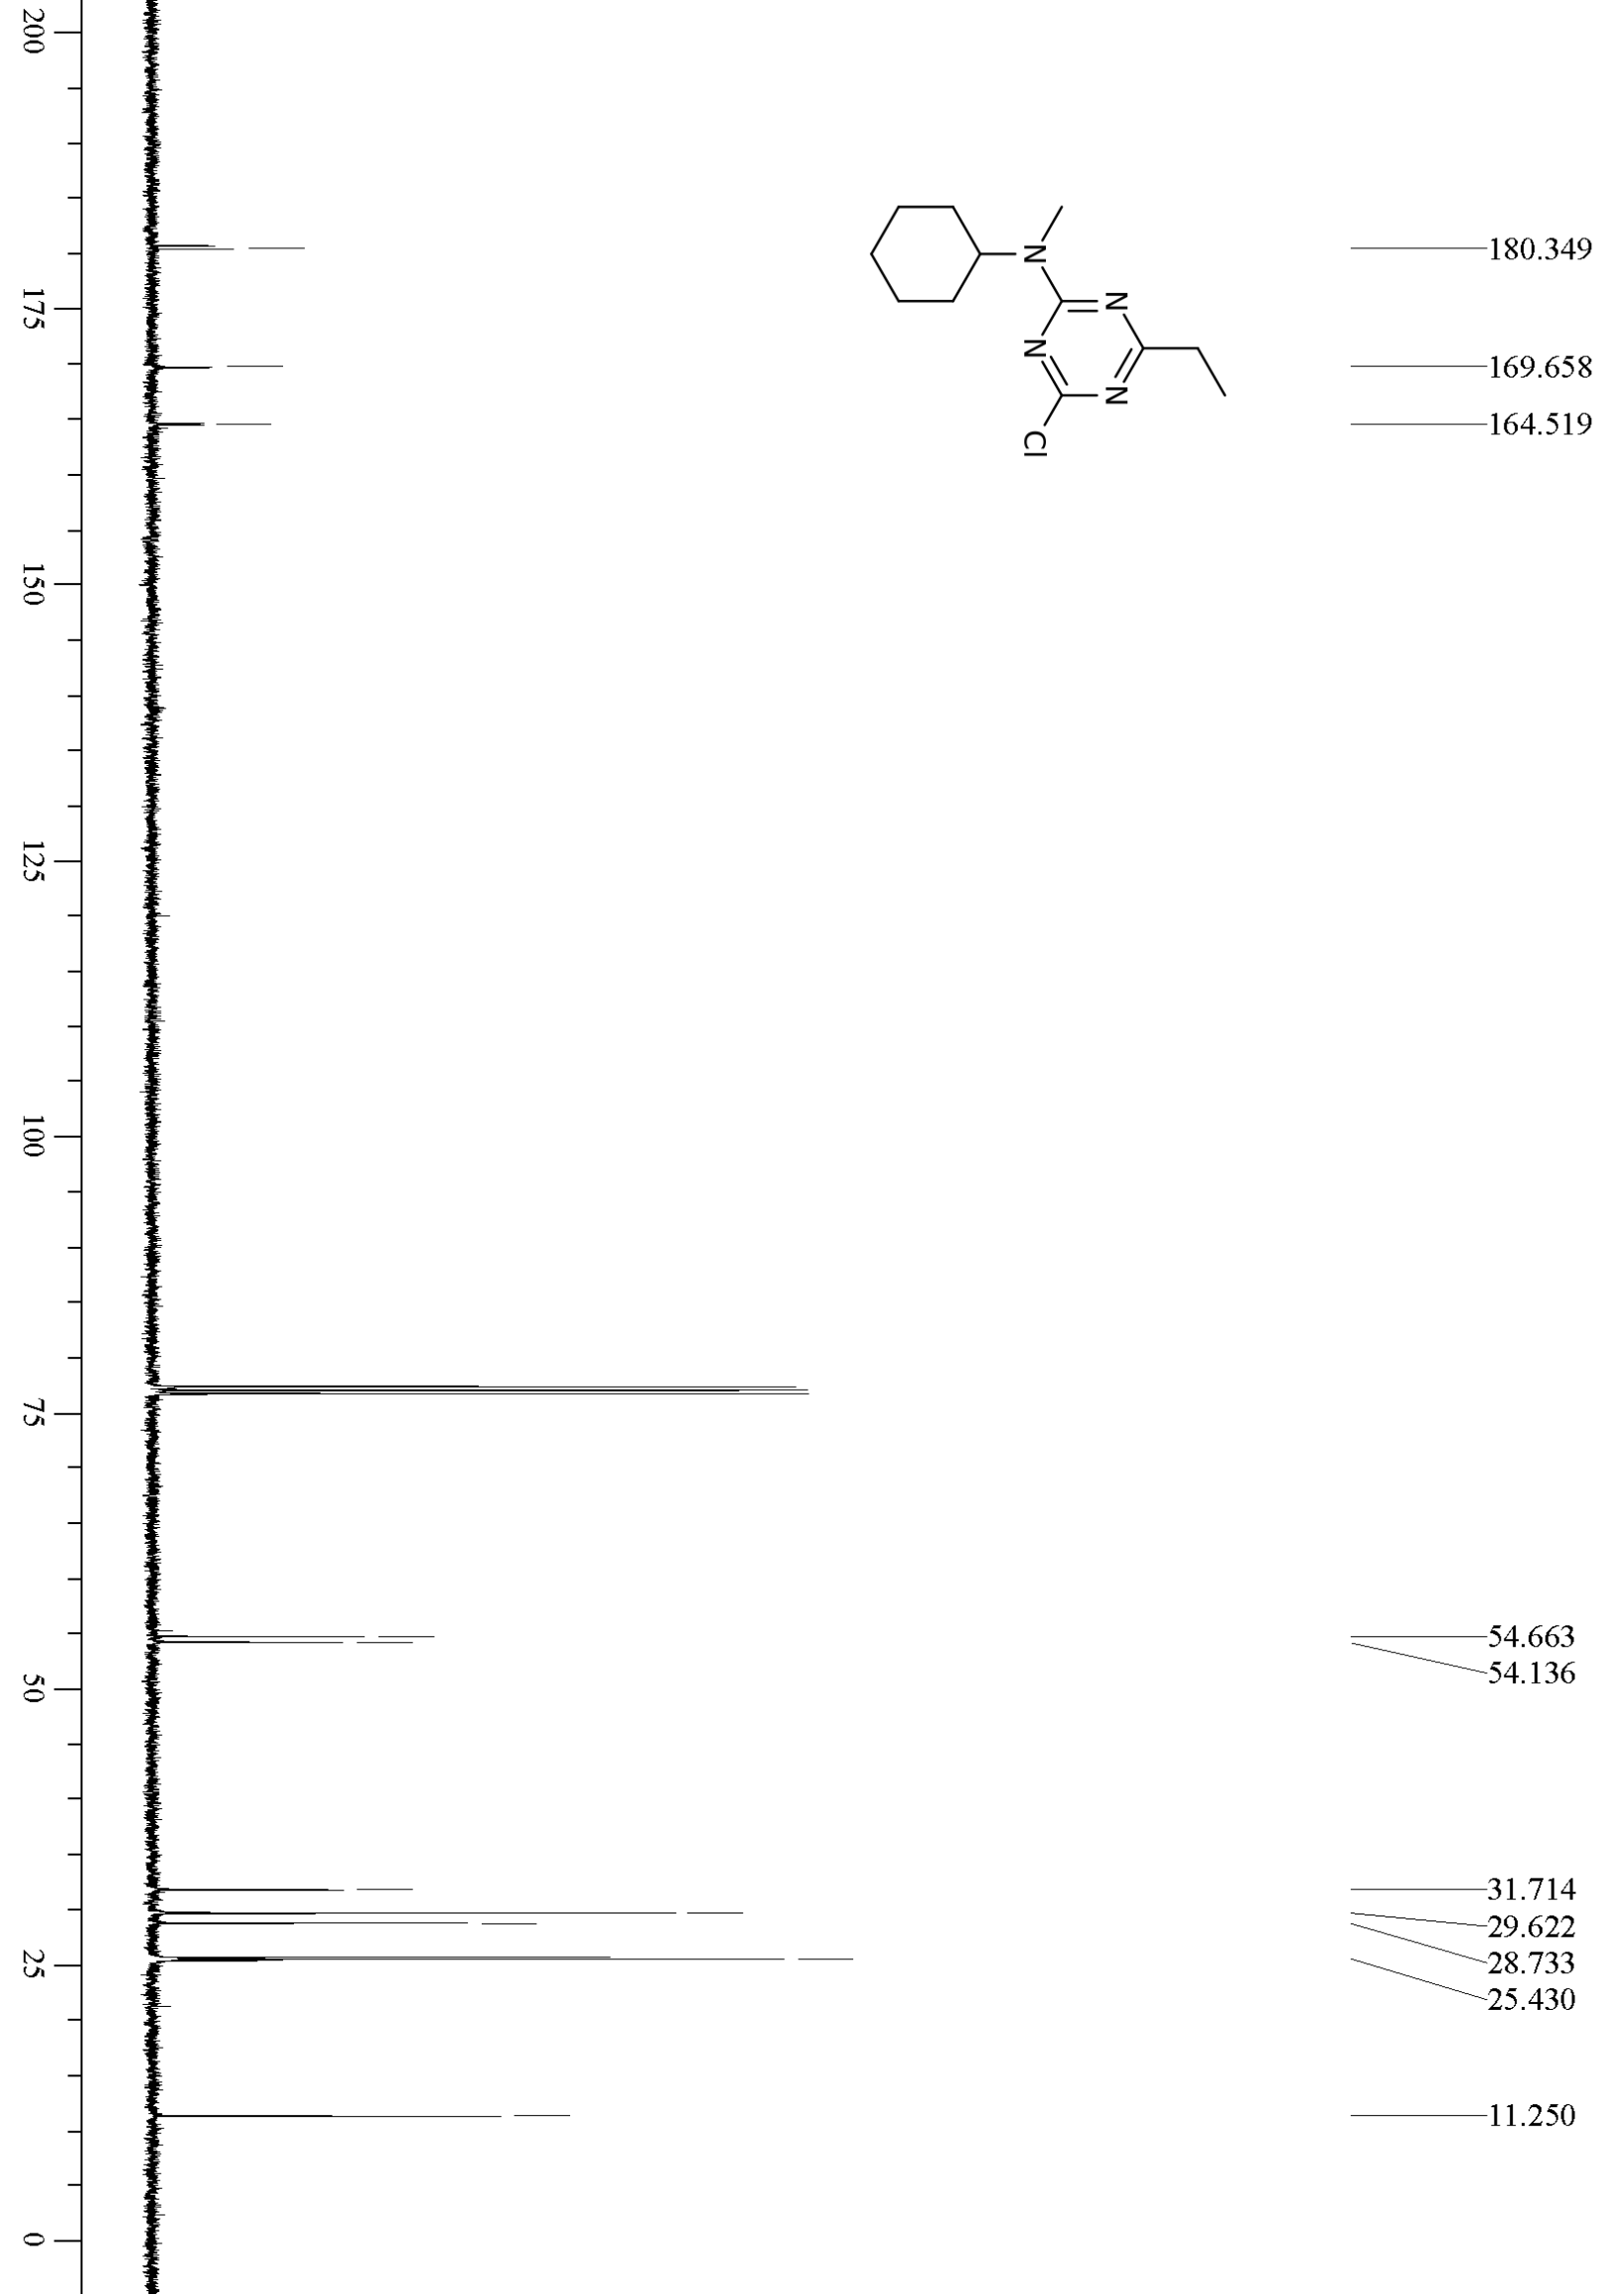

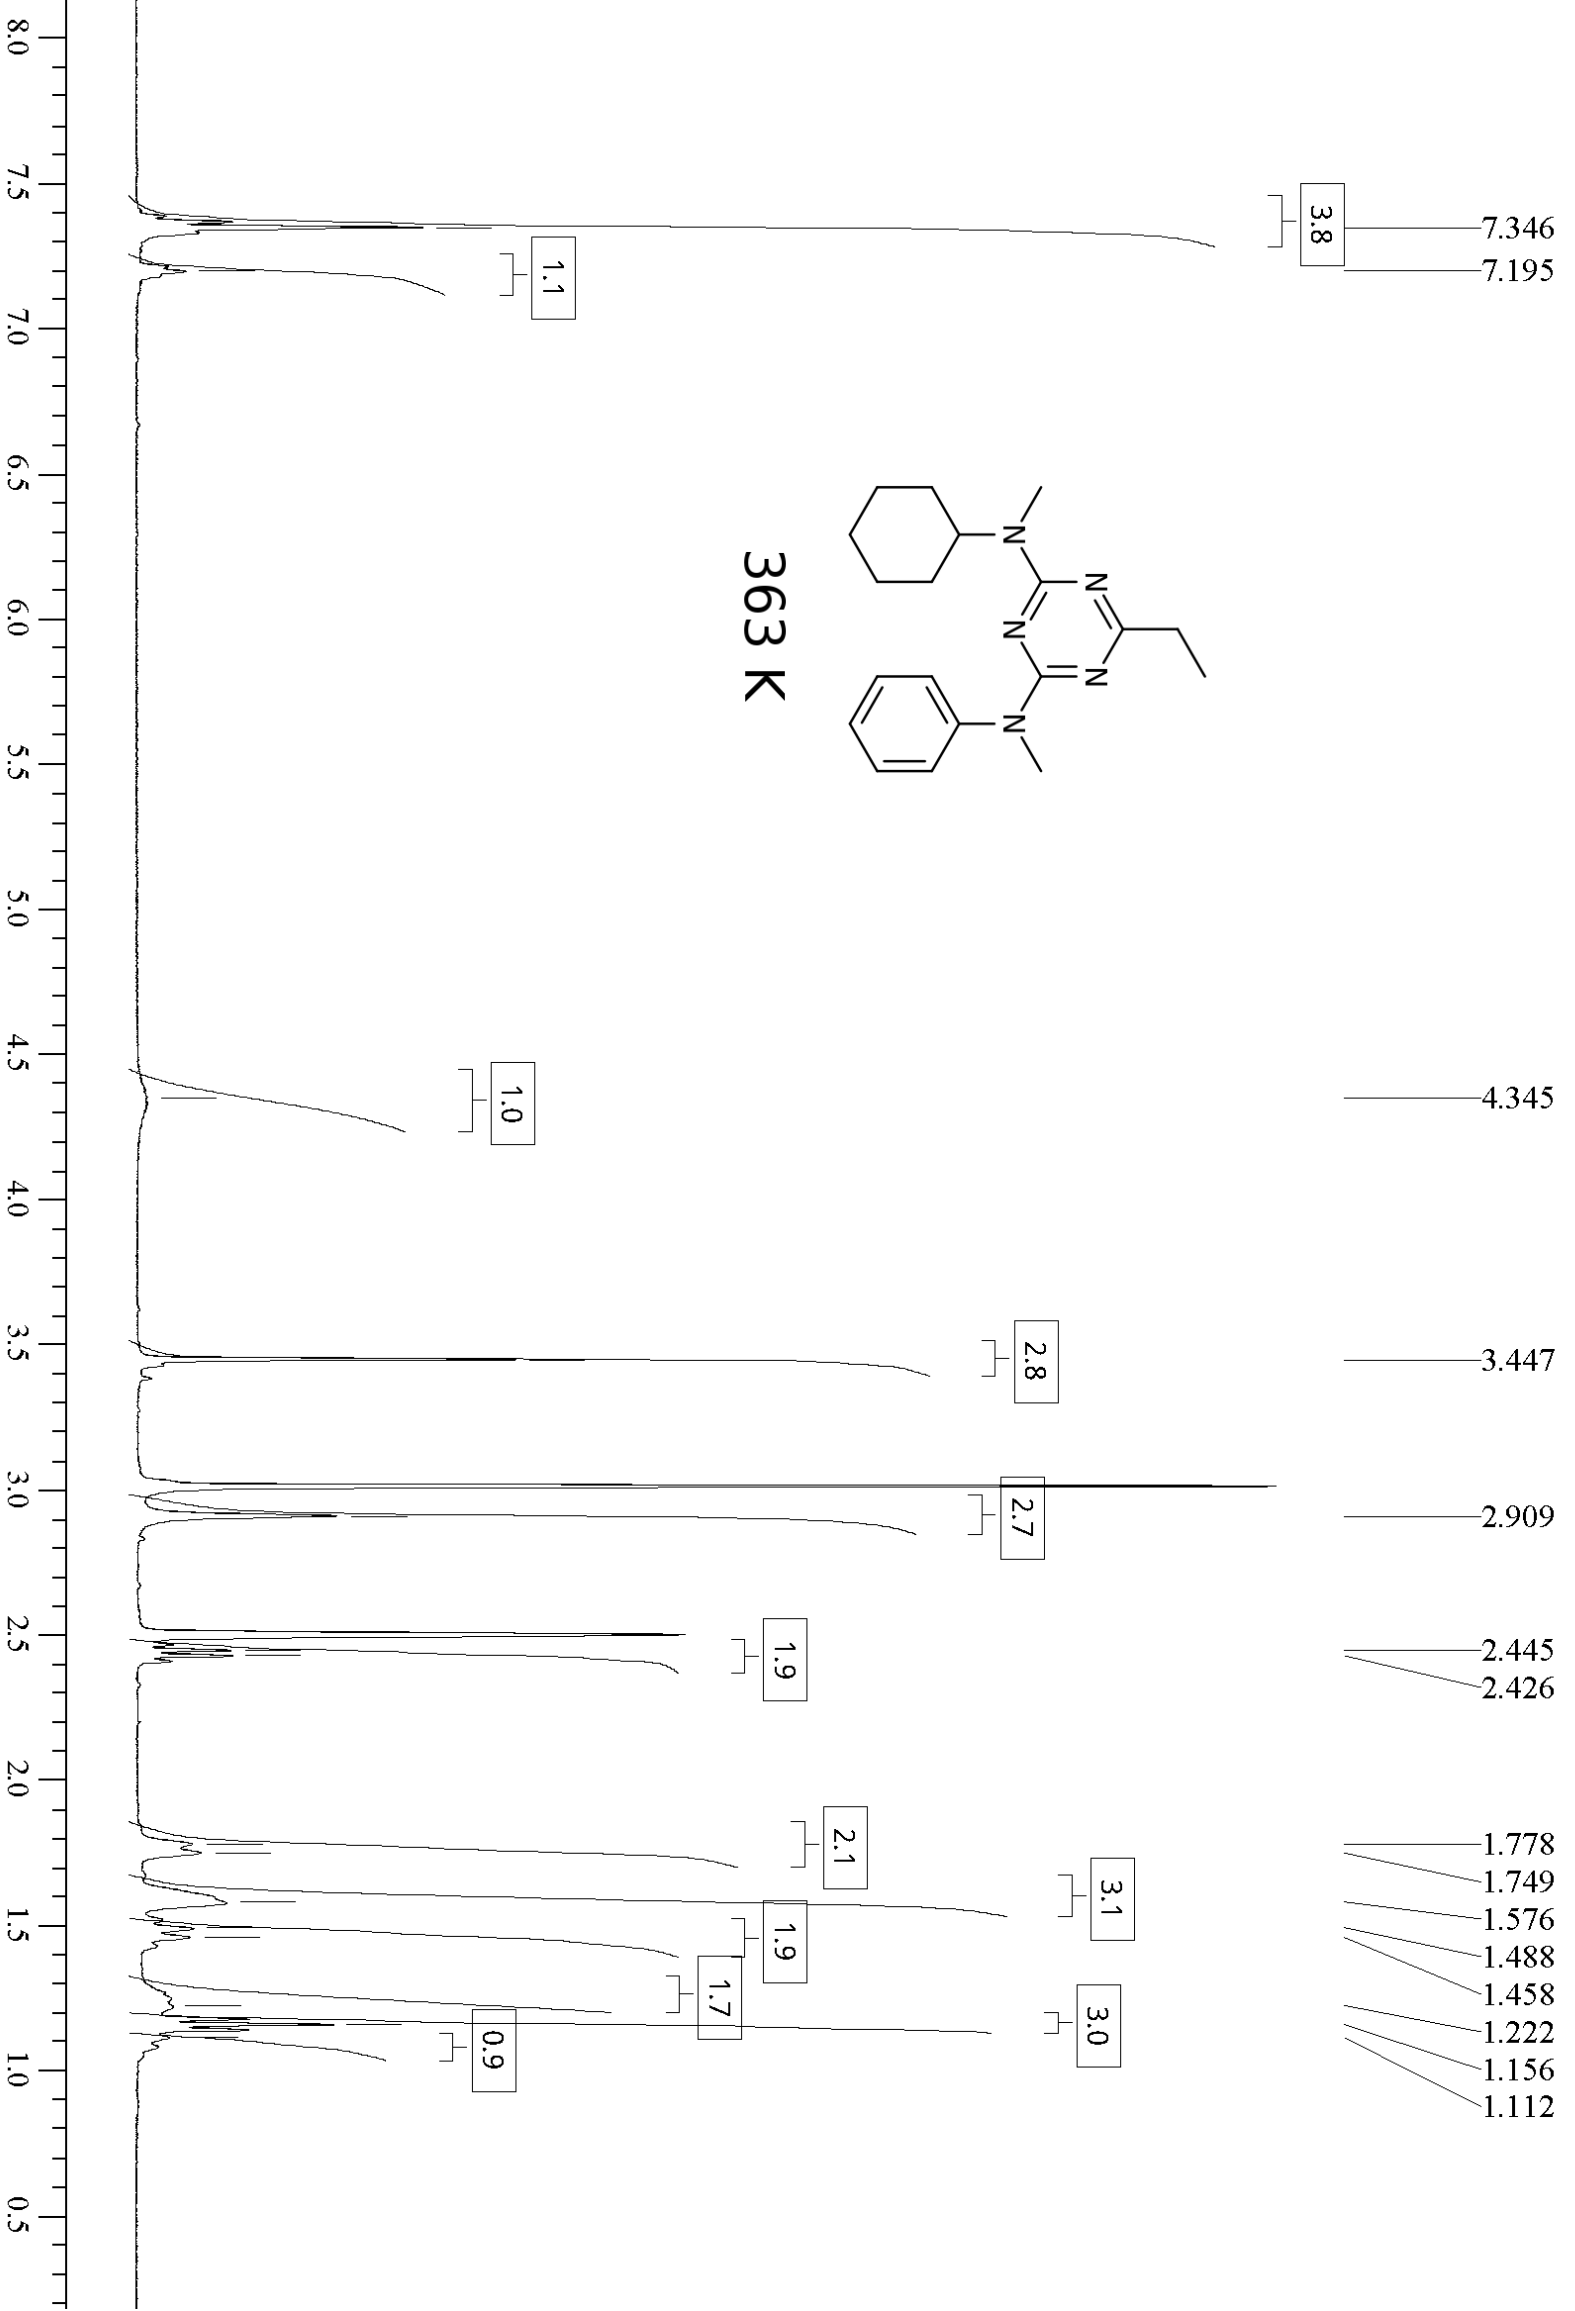

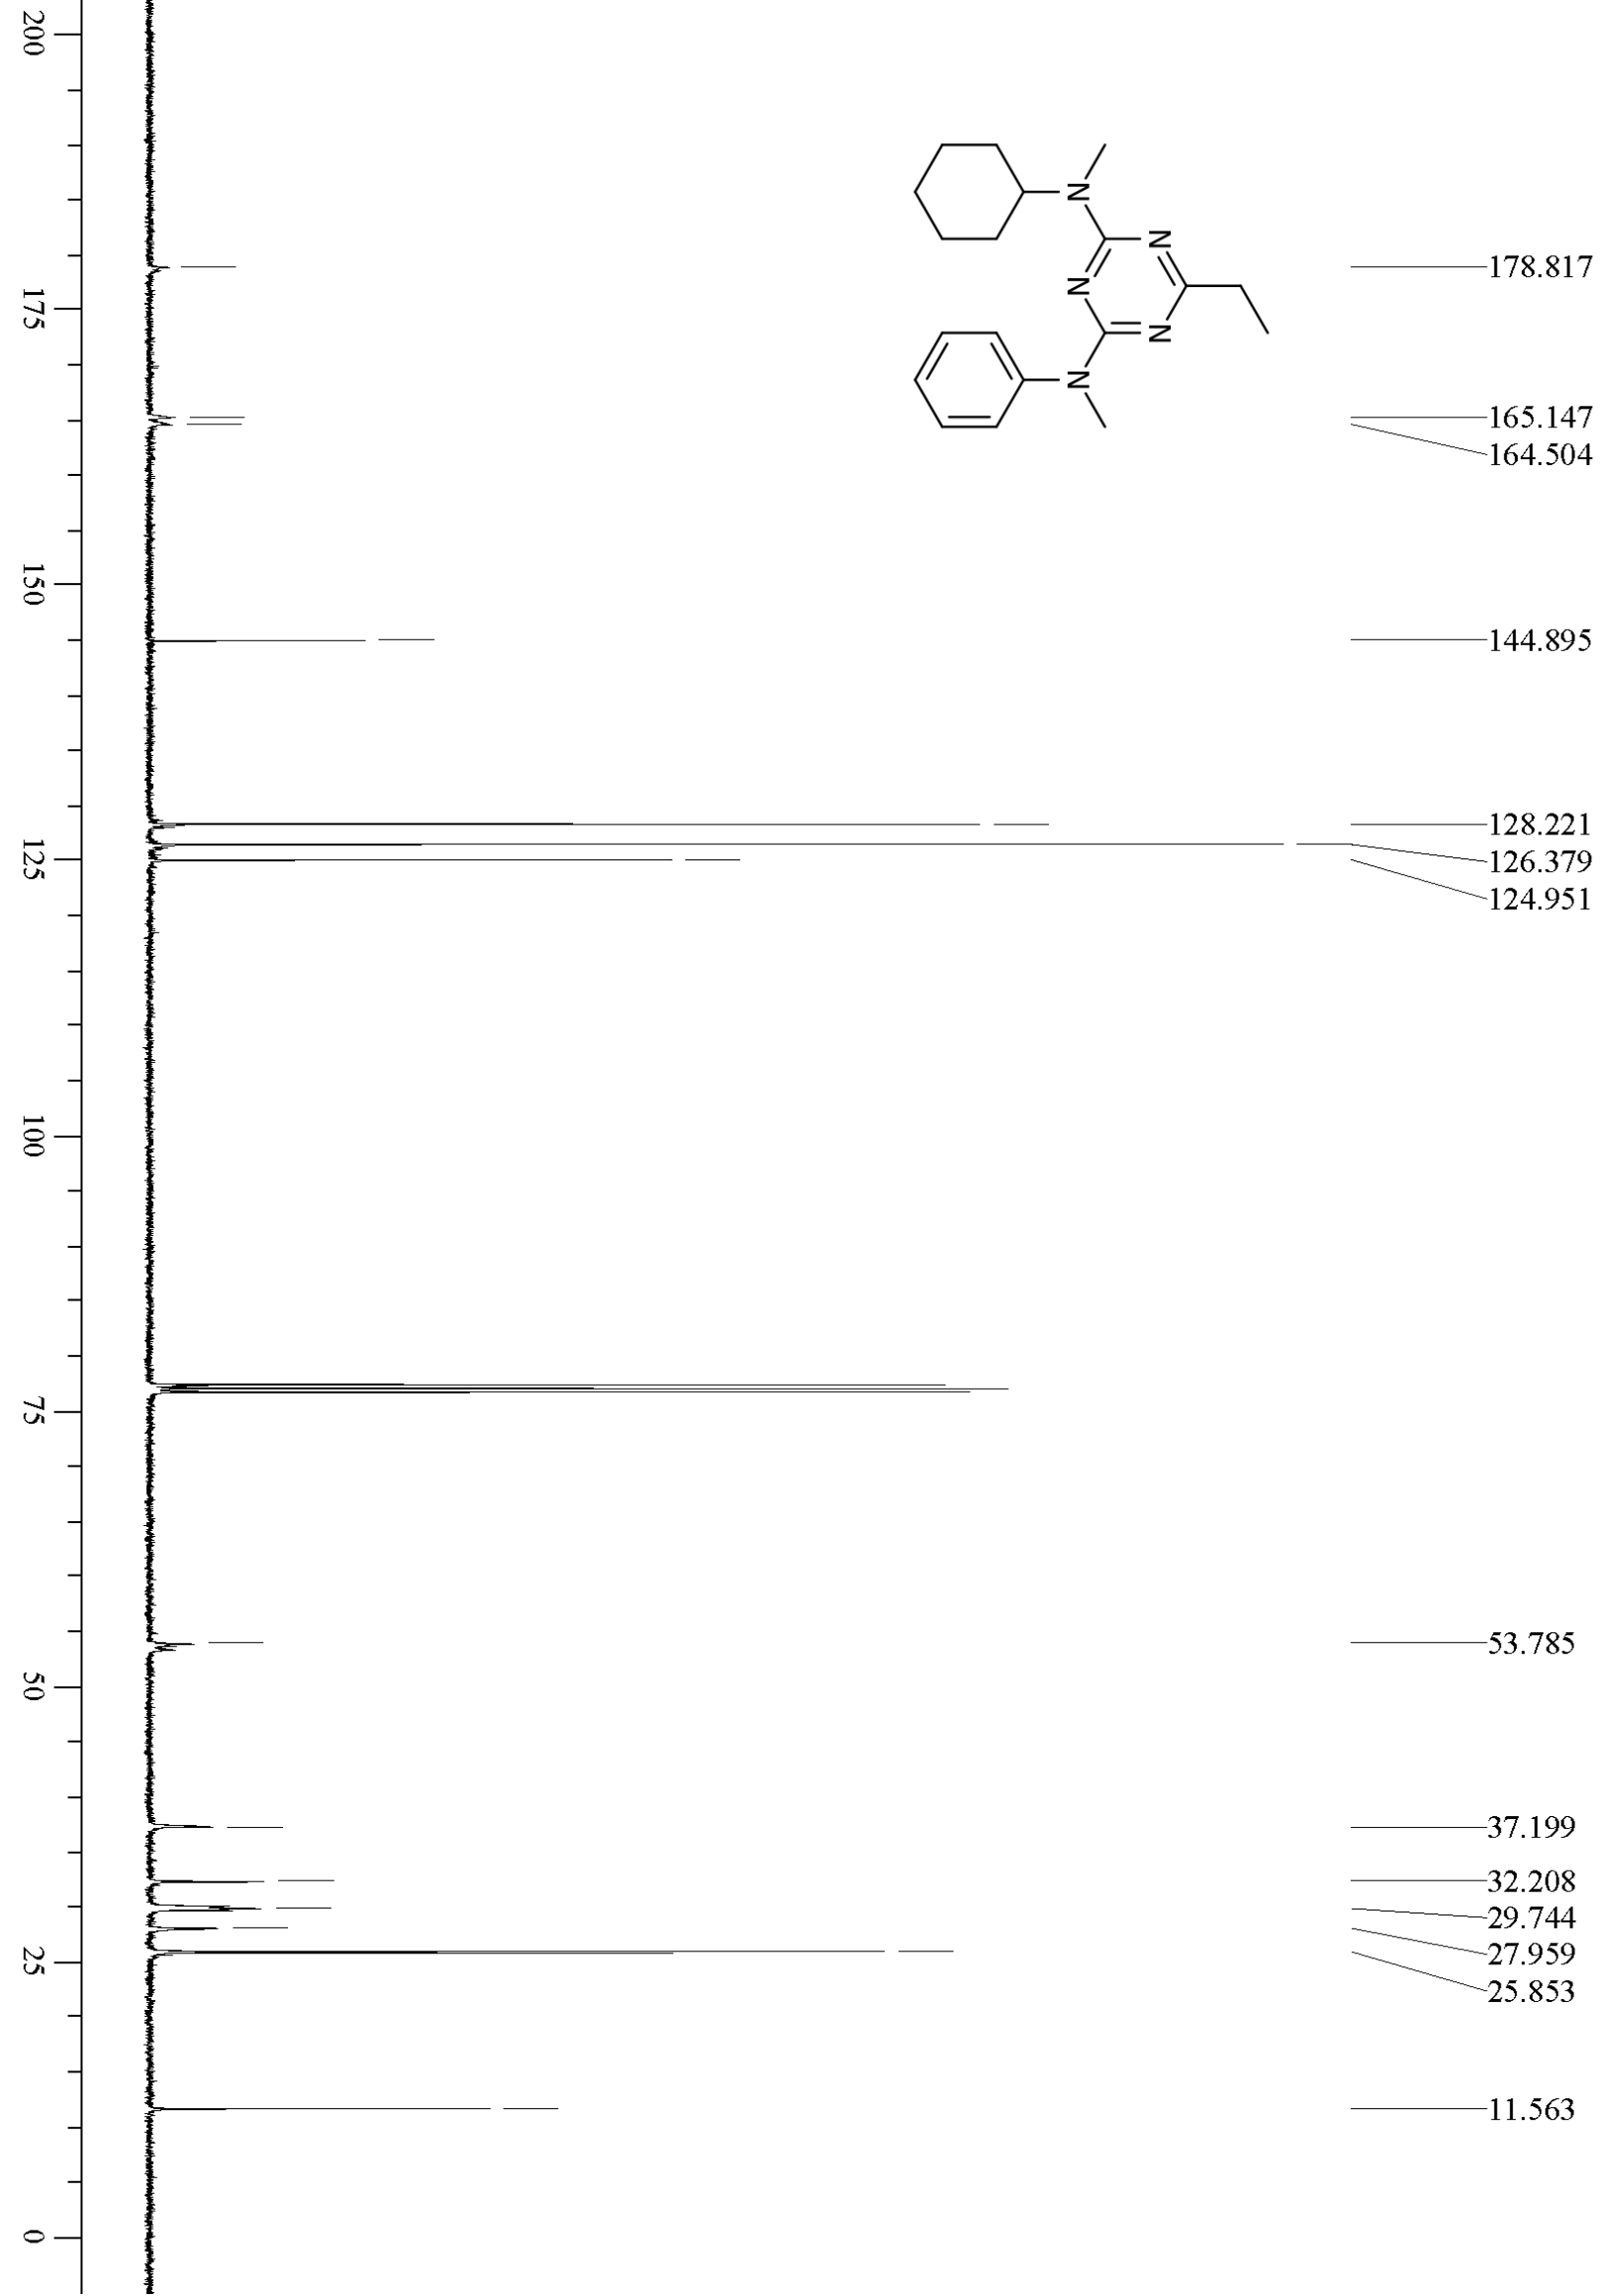

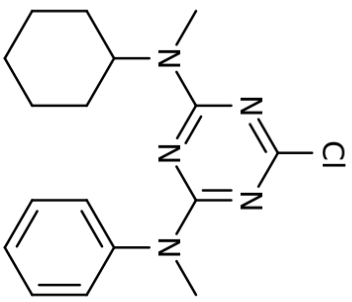

363 K

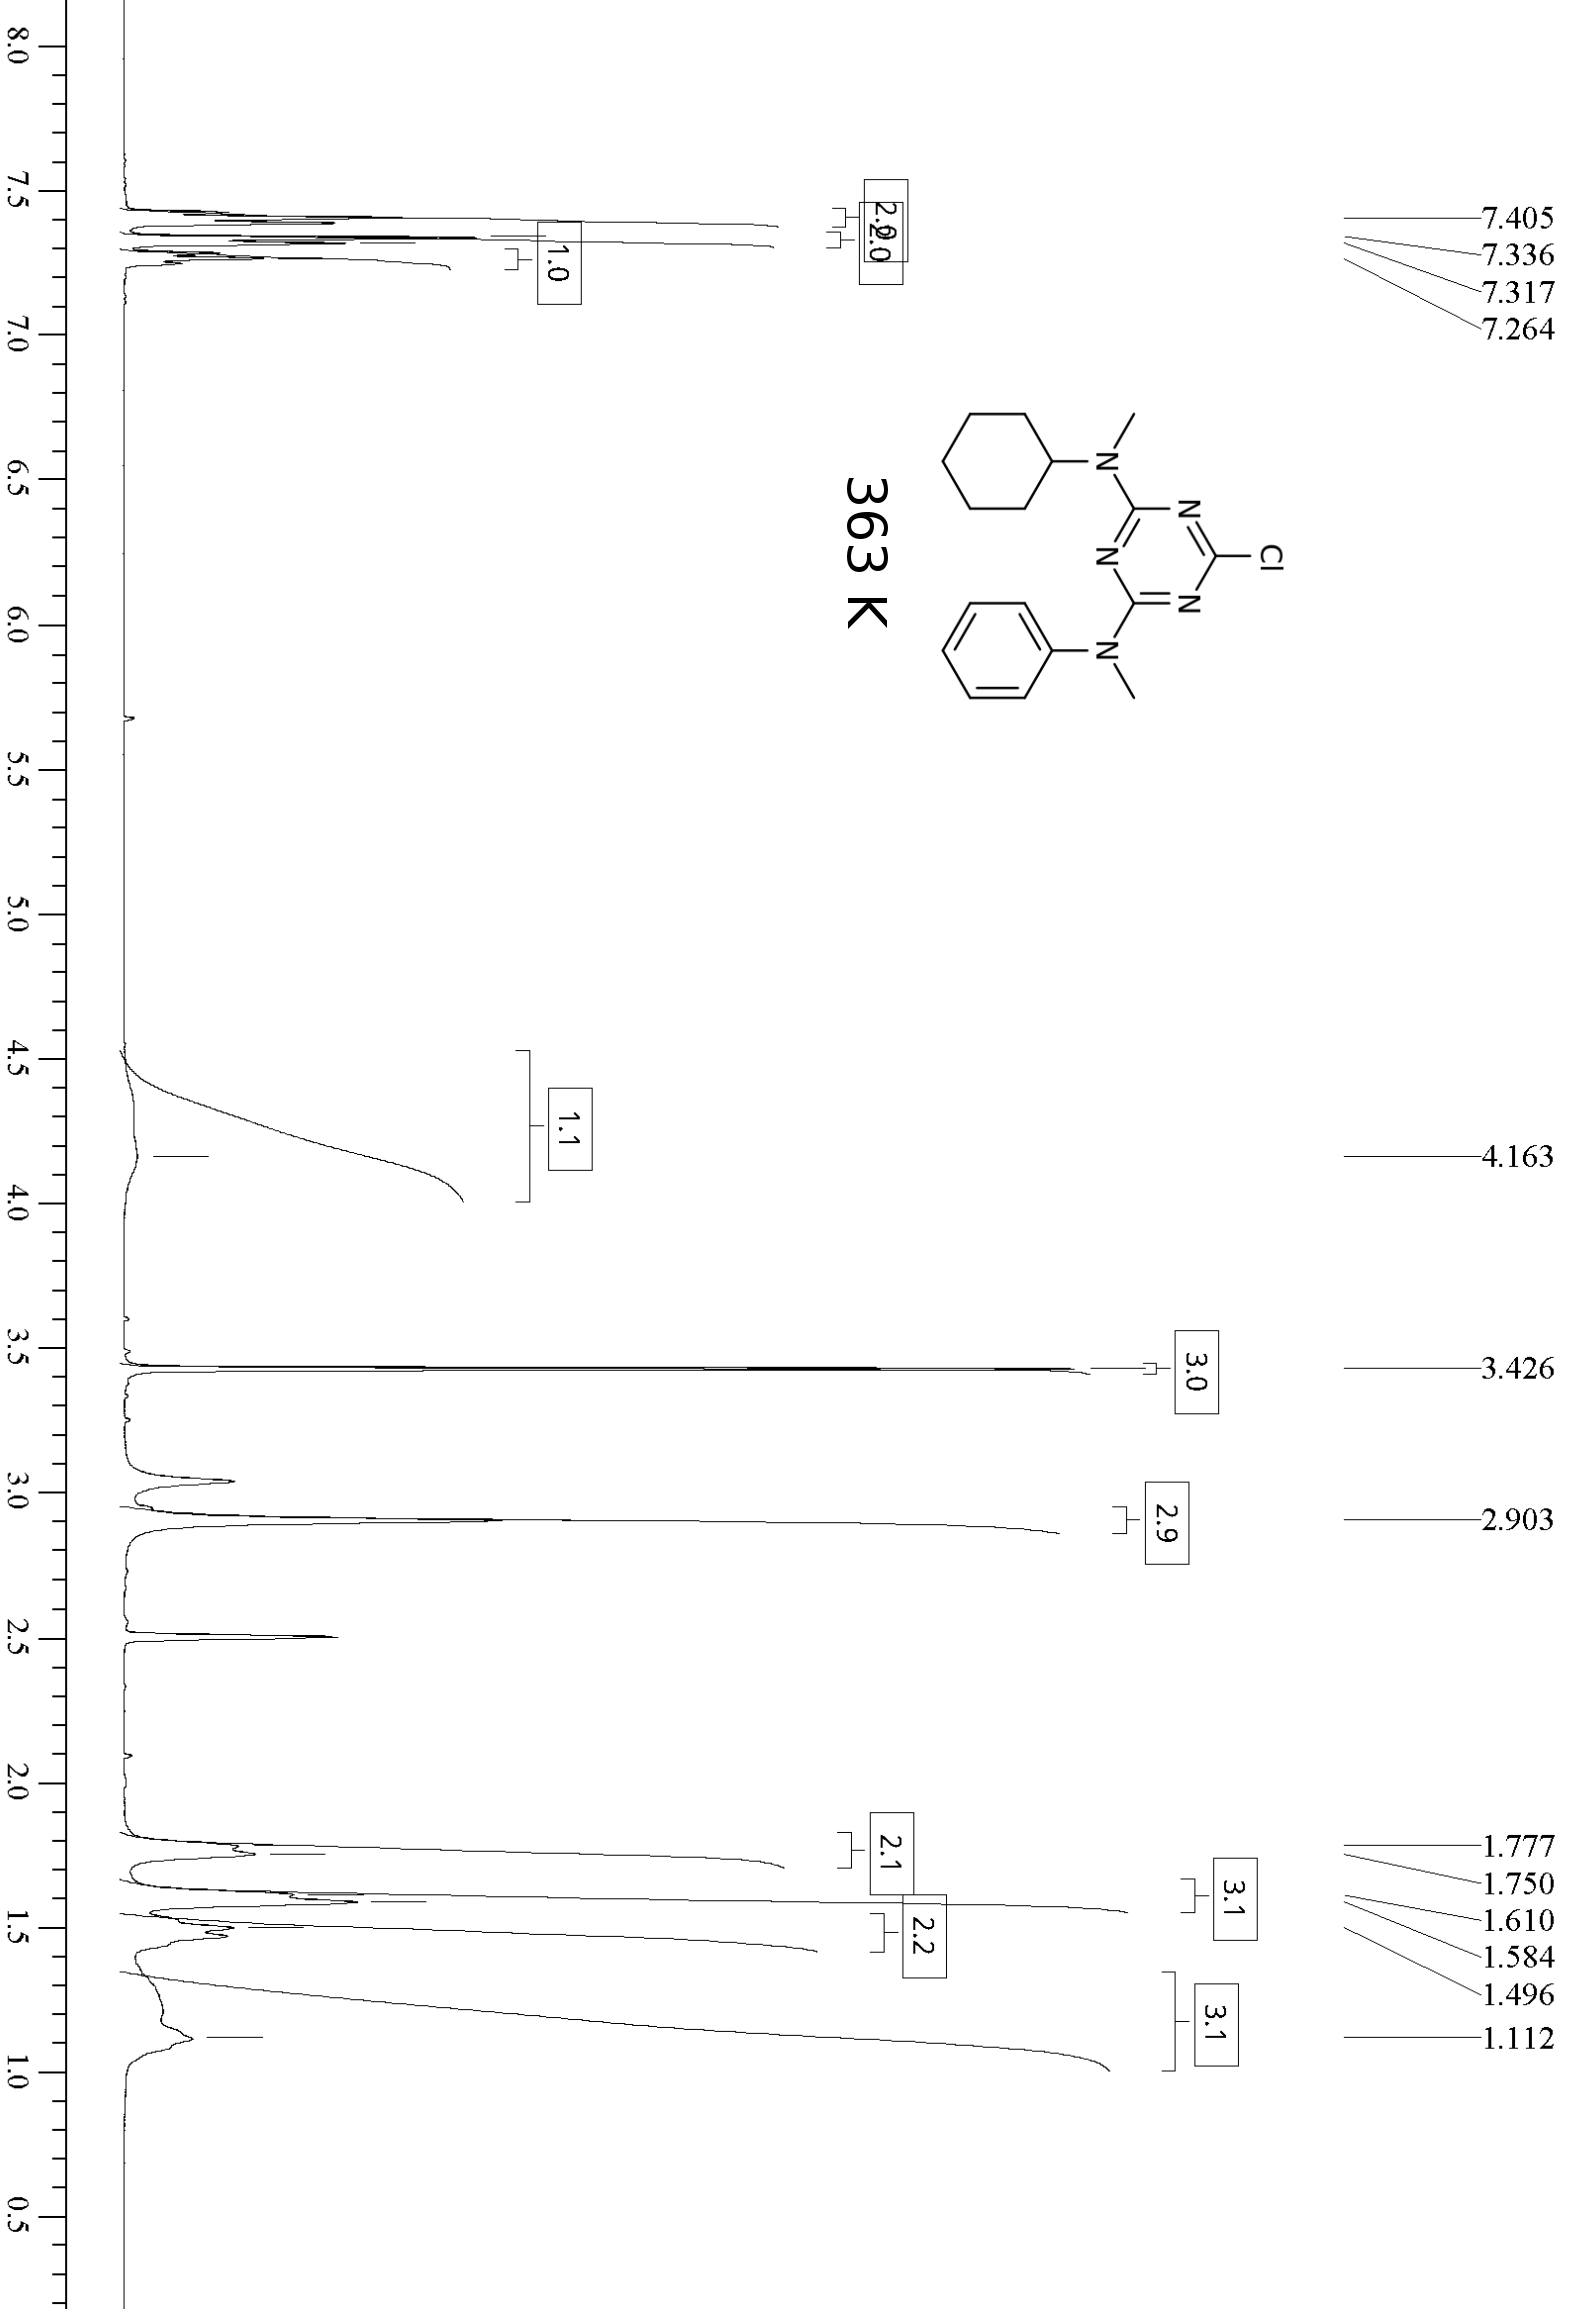

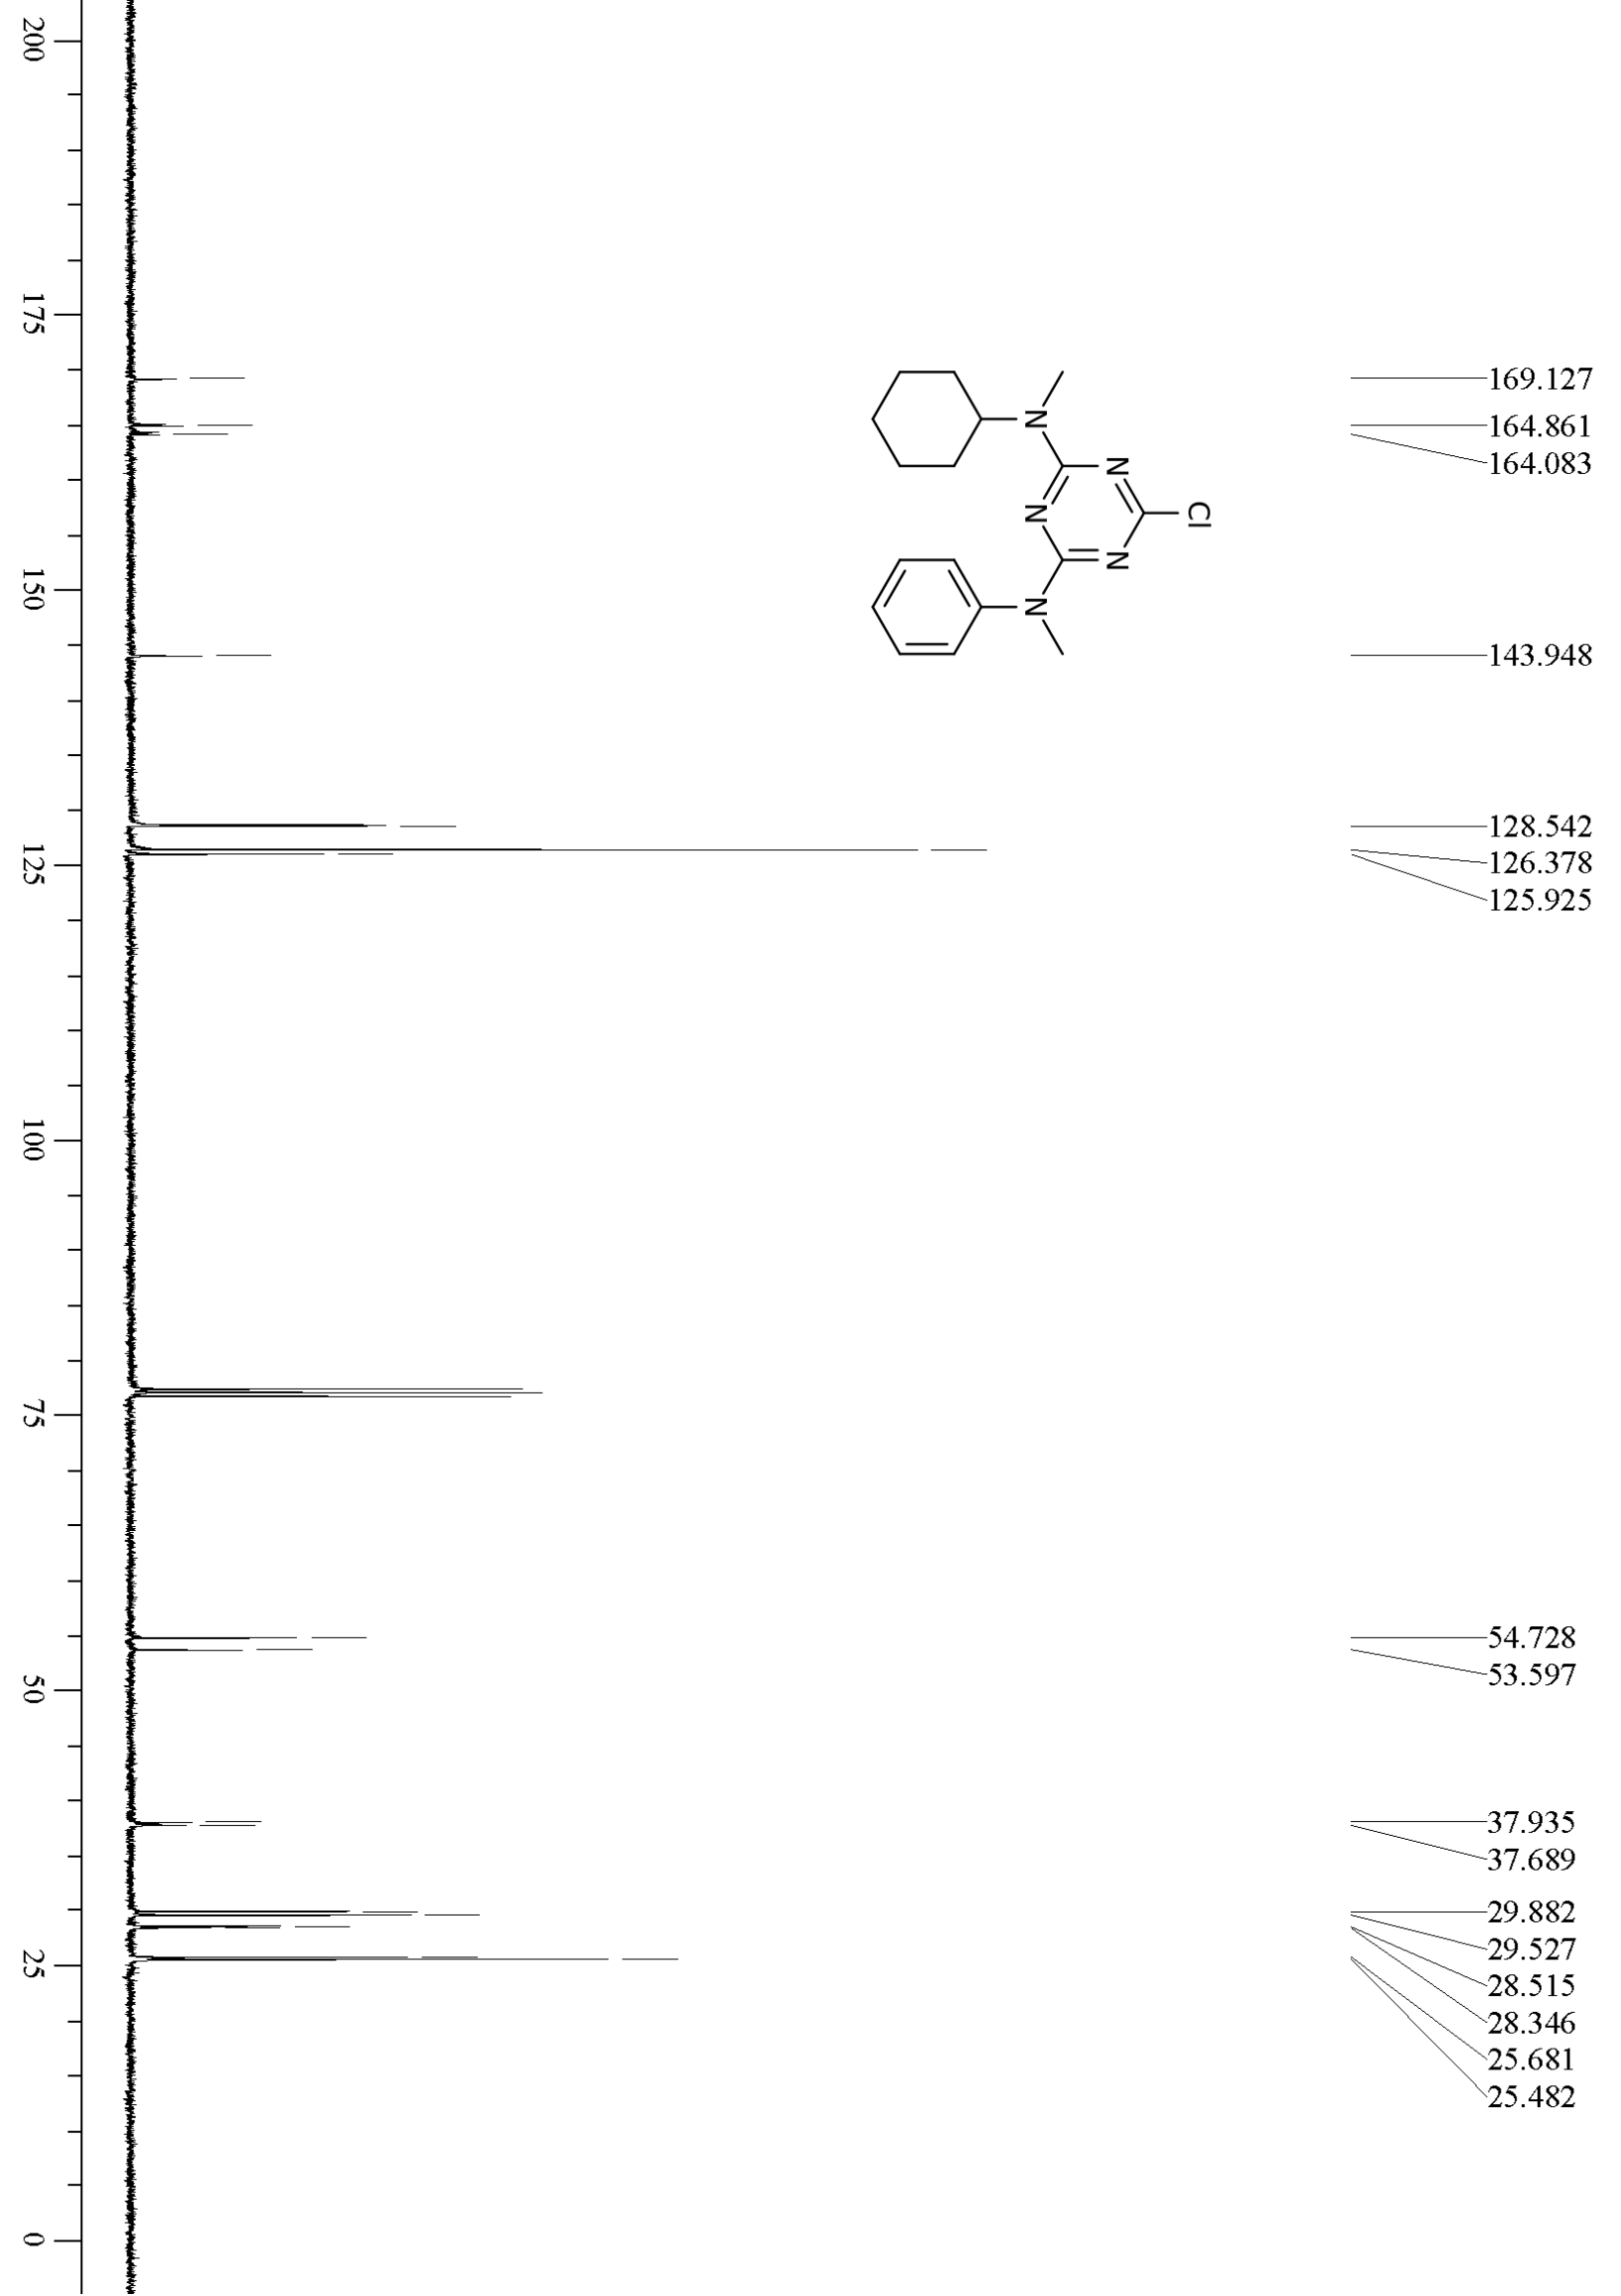



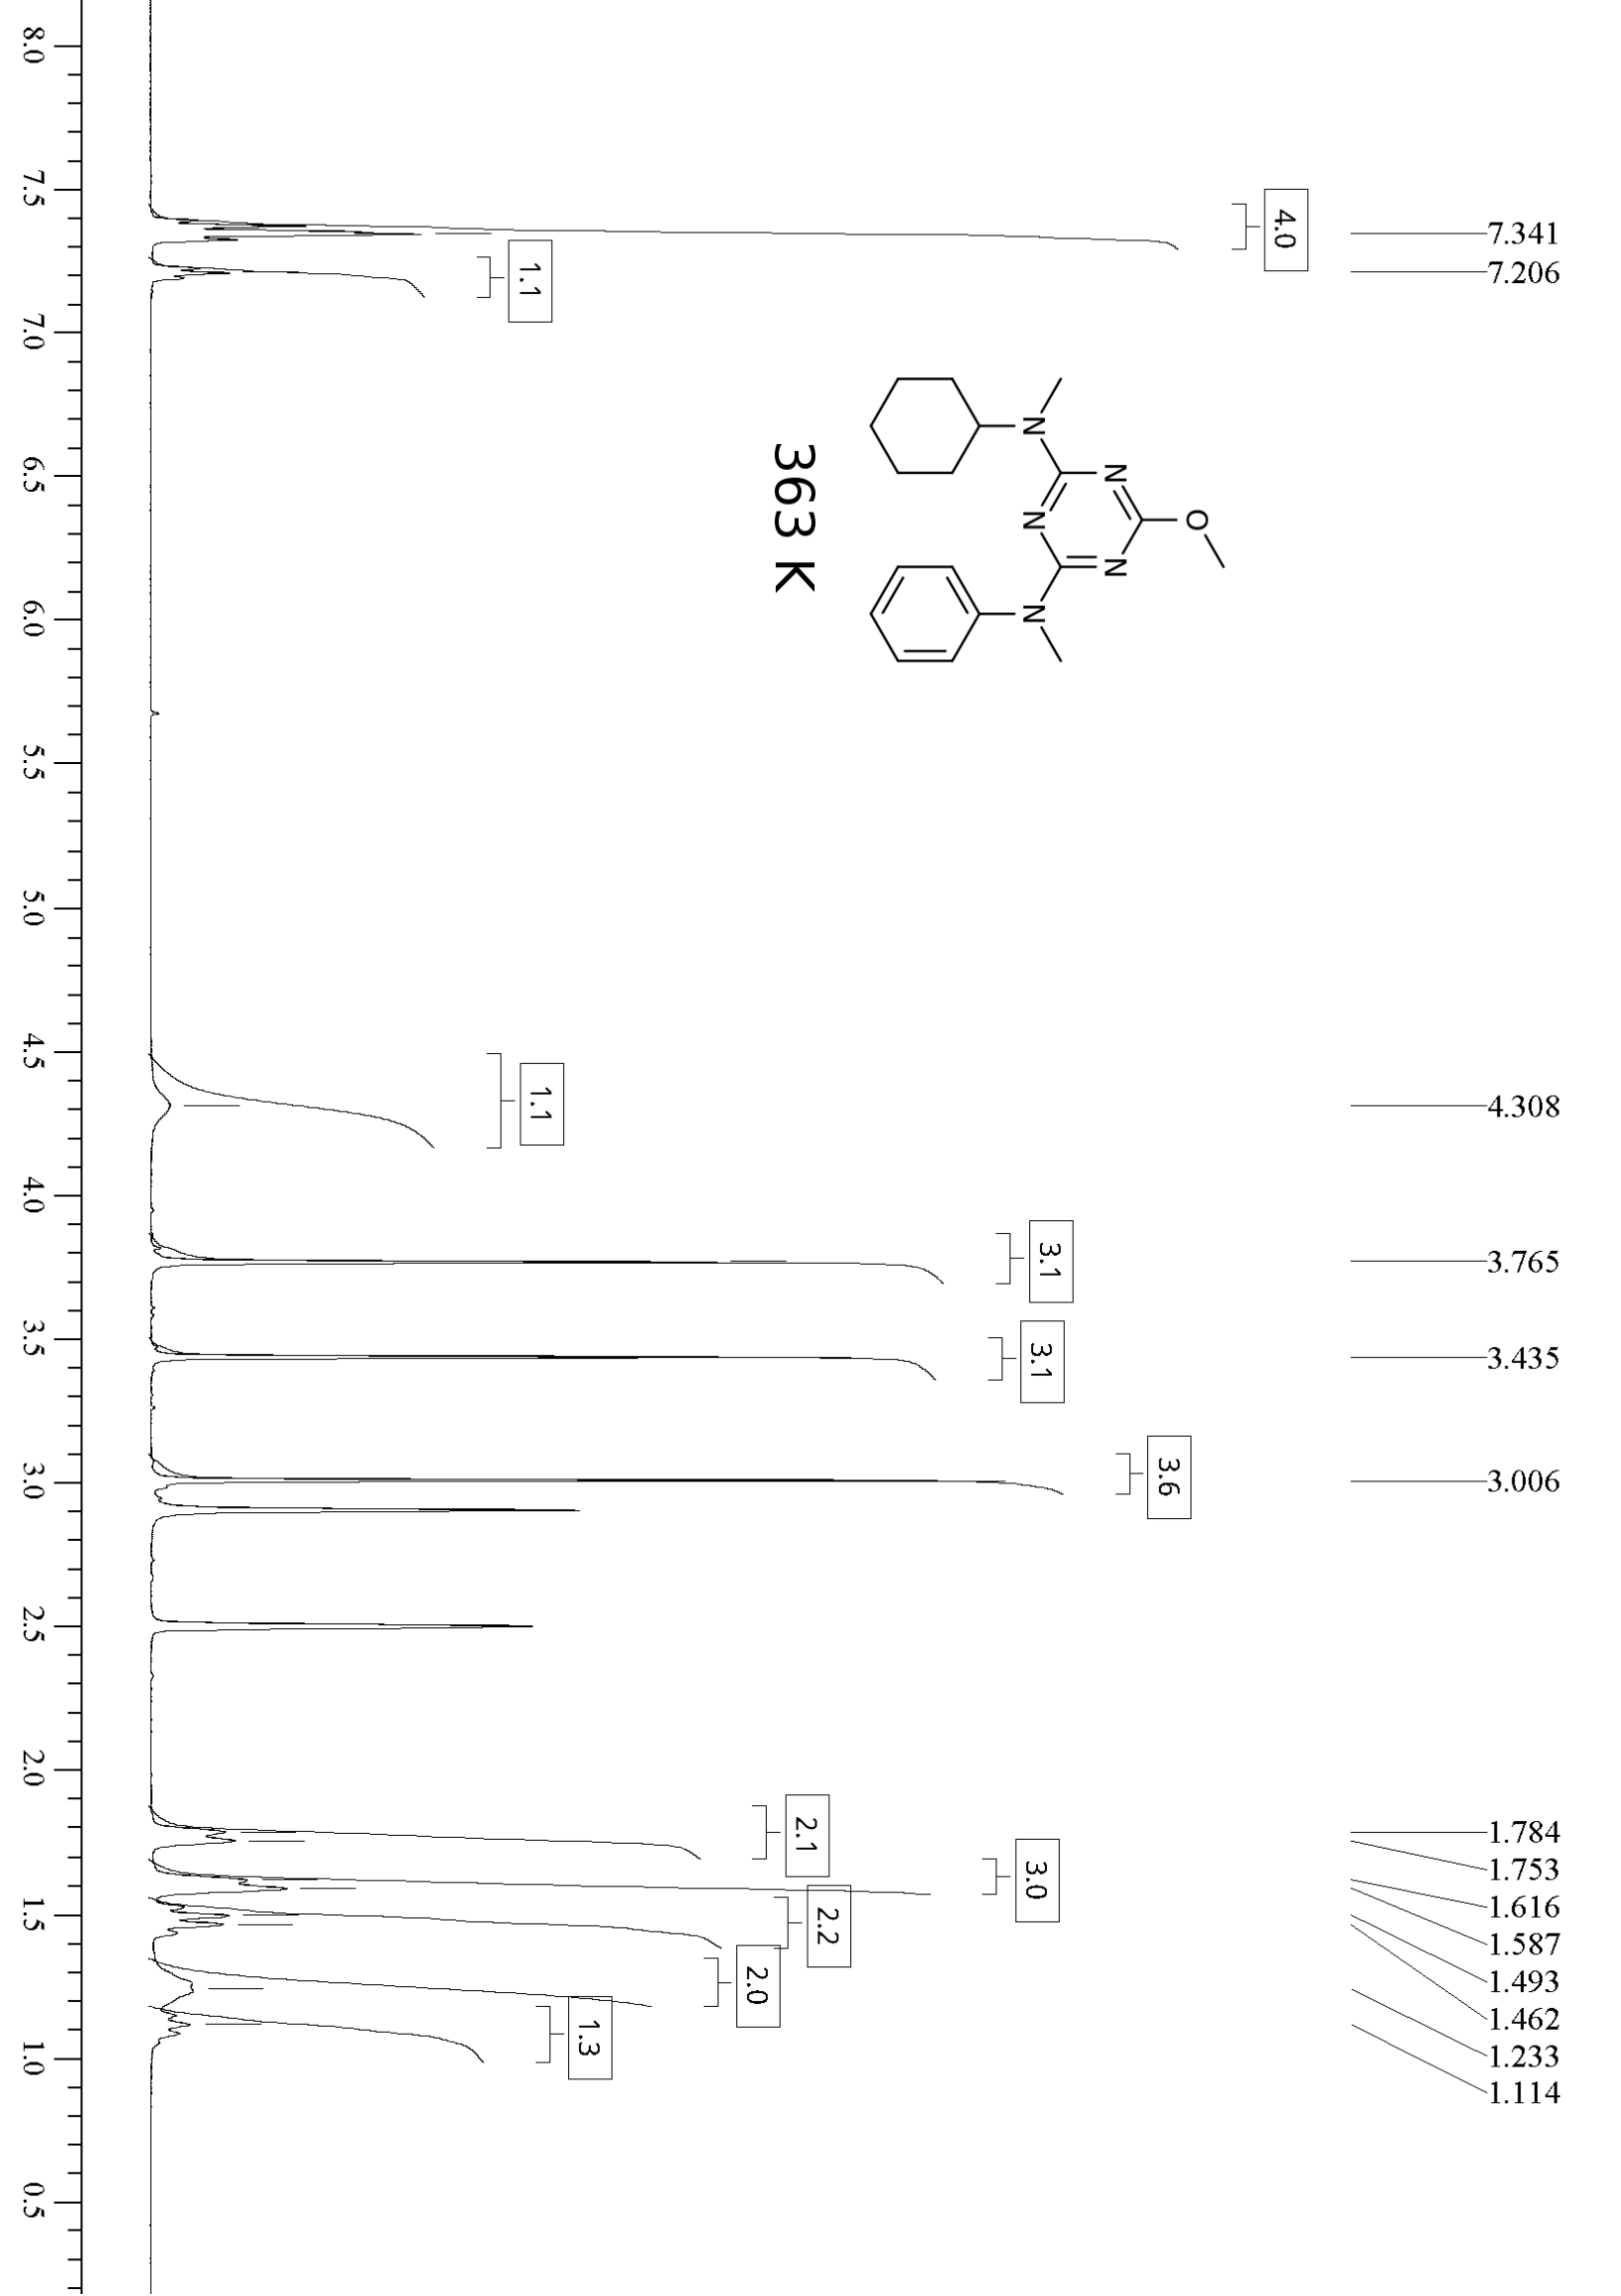

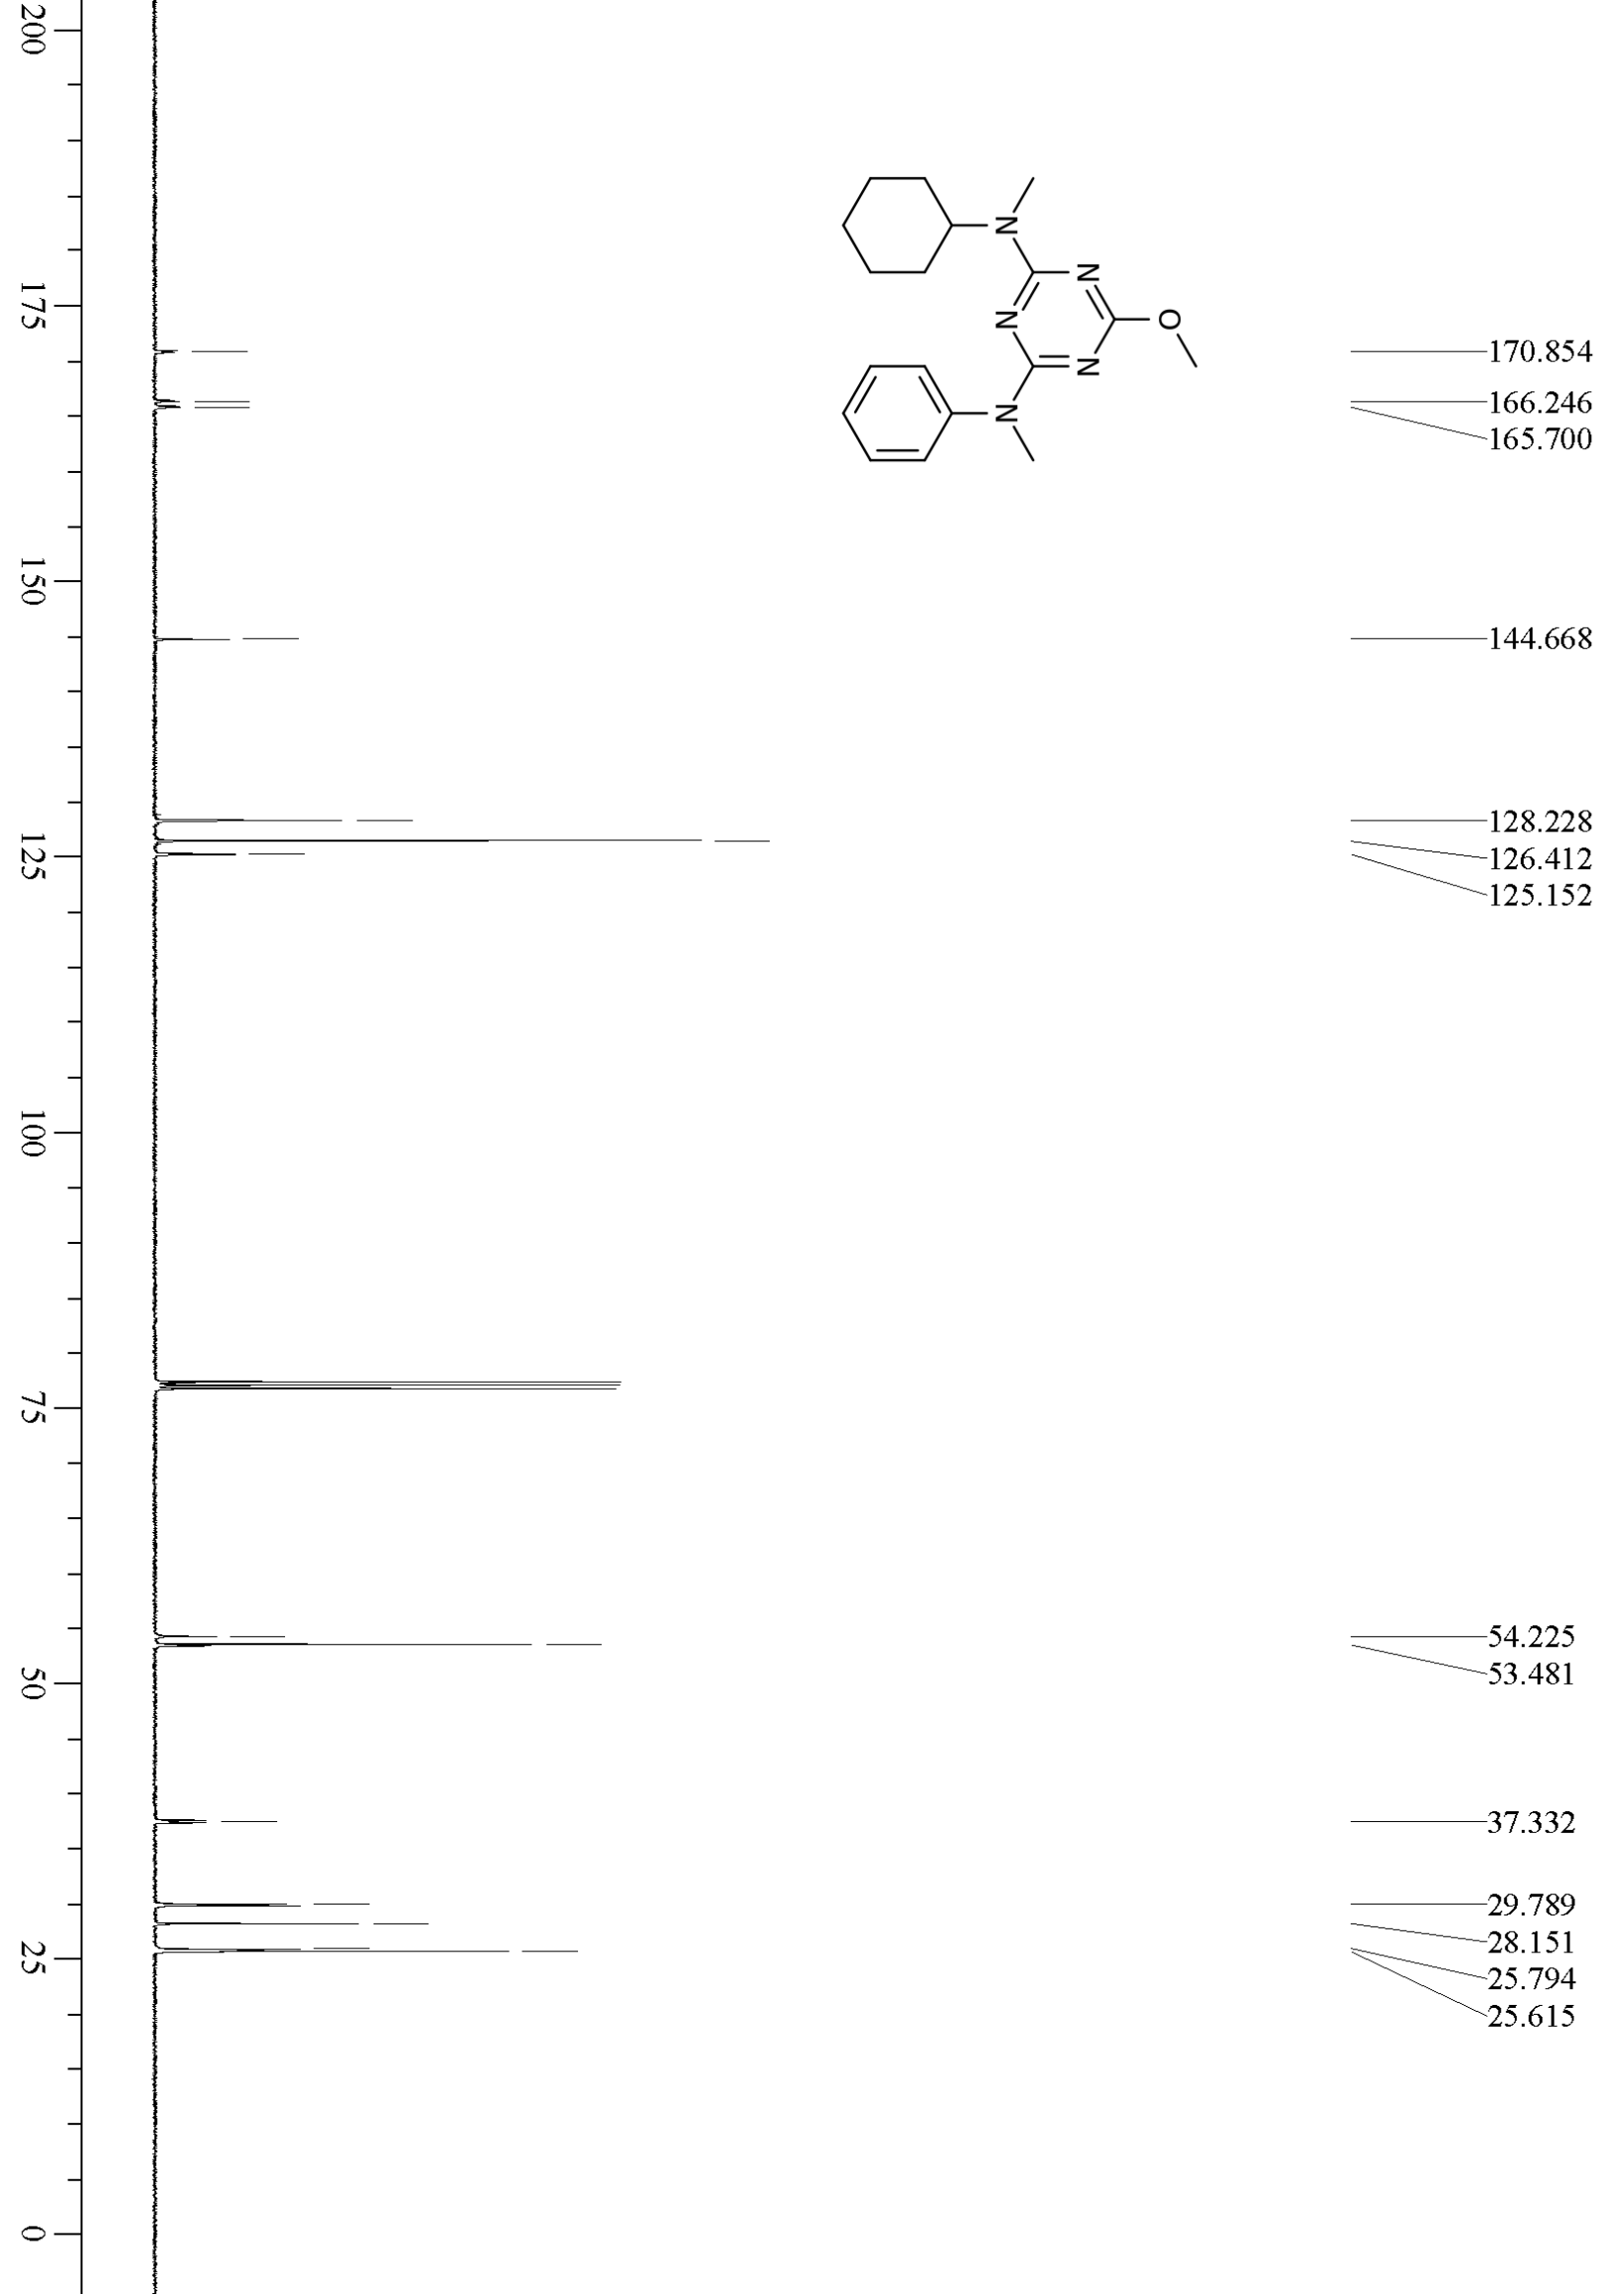

7.430  
7.411  
7.352  
7.155

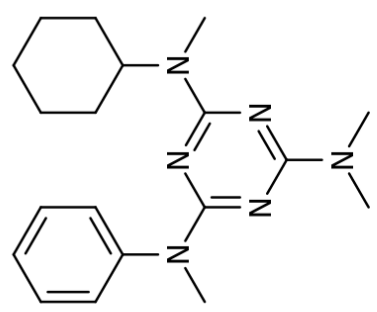

4.427

3.556

3.110

2.993

1.842

1.817

1.710

1.440

1.148

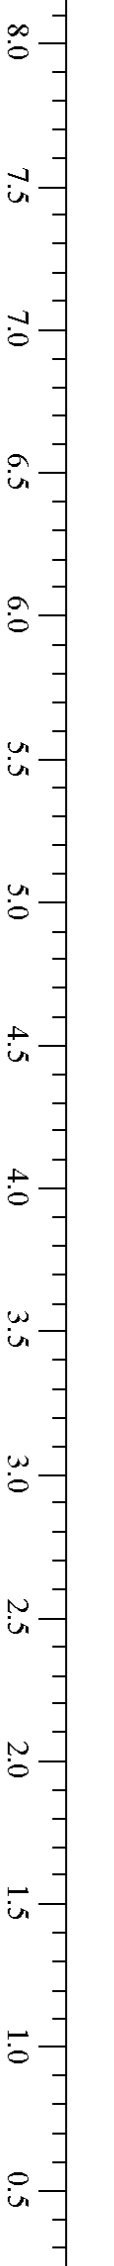

2.00

1.0

0.9

3.0

5.9

3.0

2.1

3.0

4.2

1.0

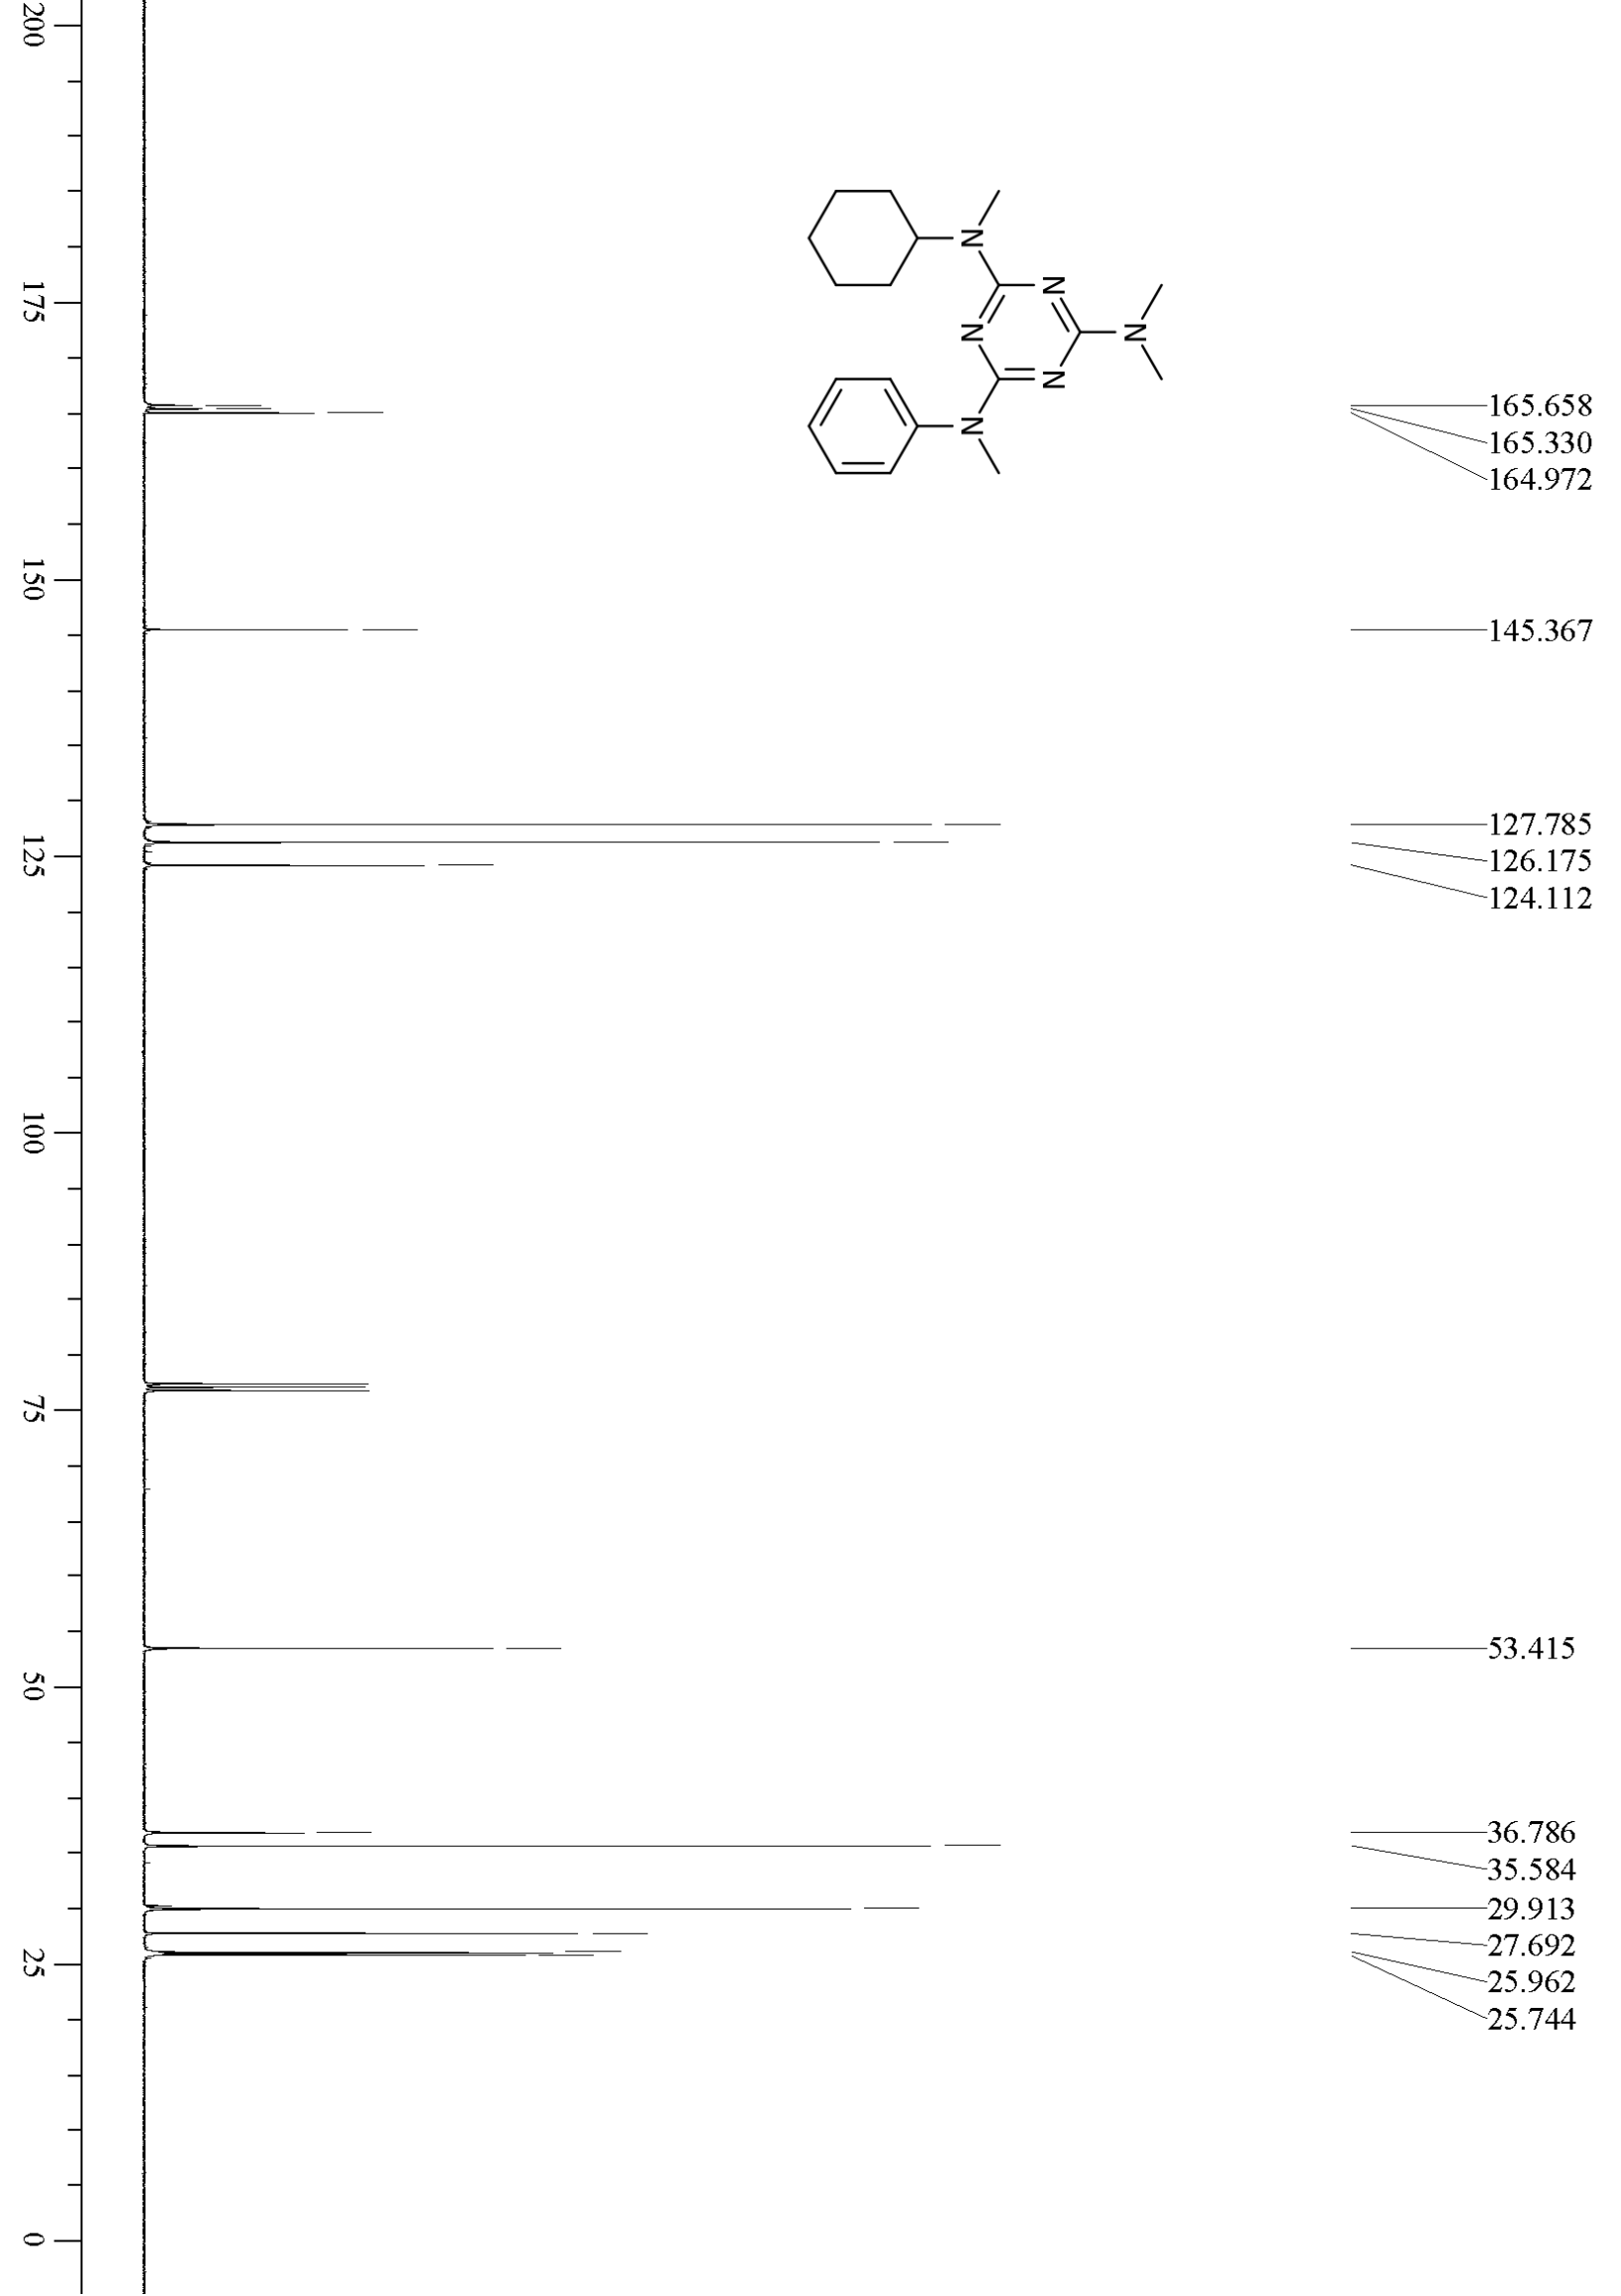

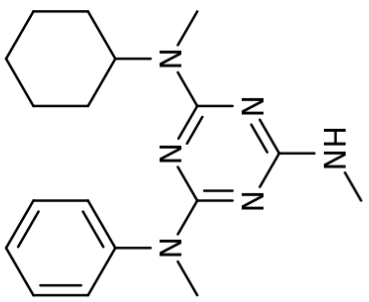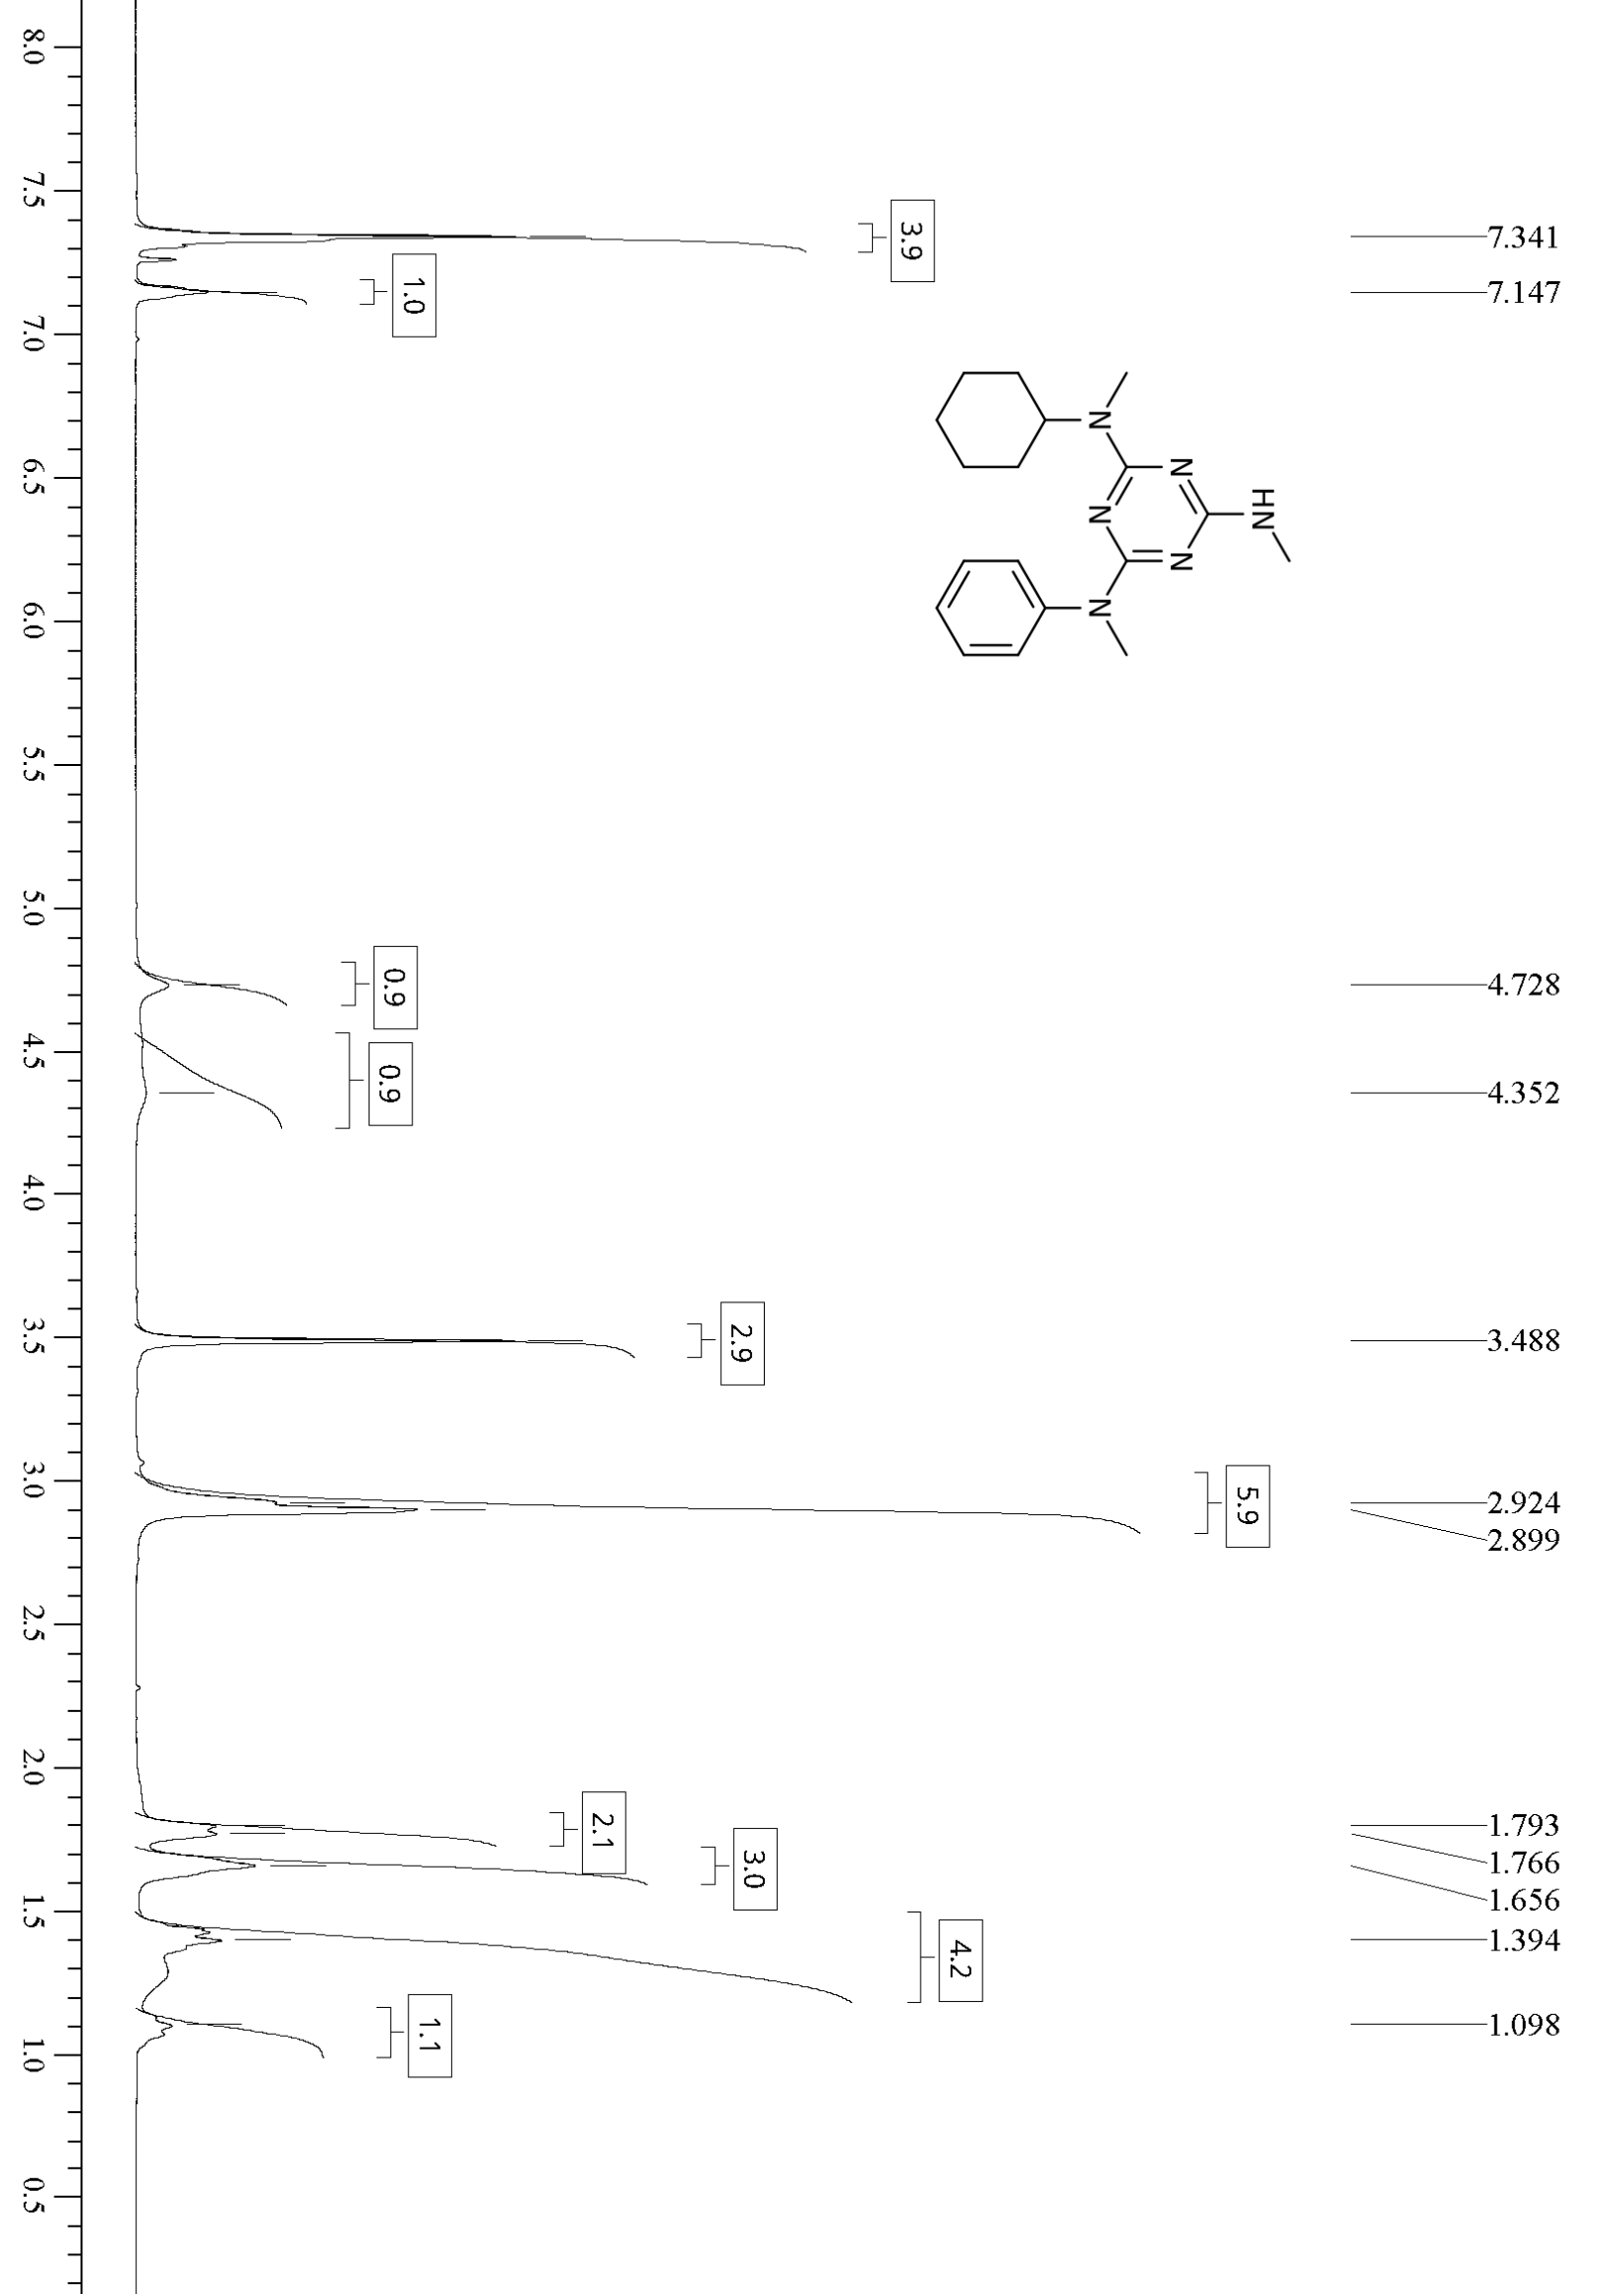

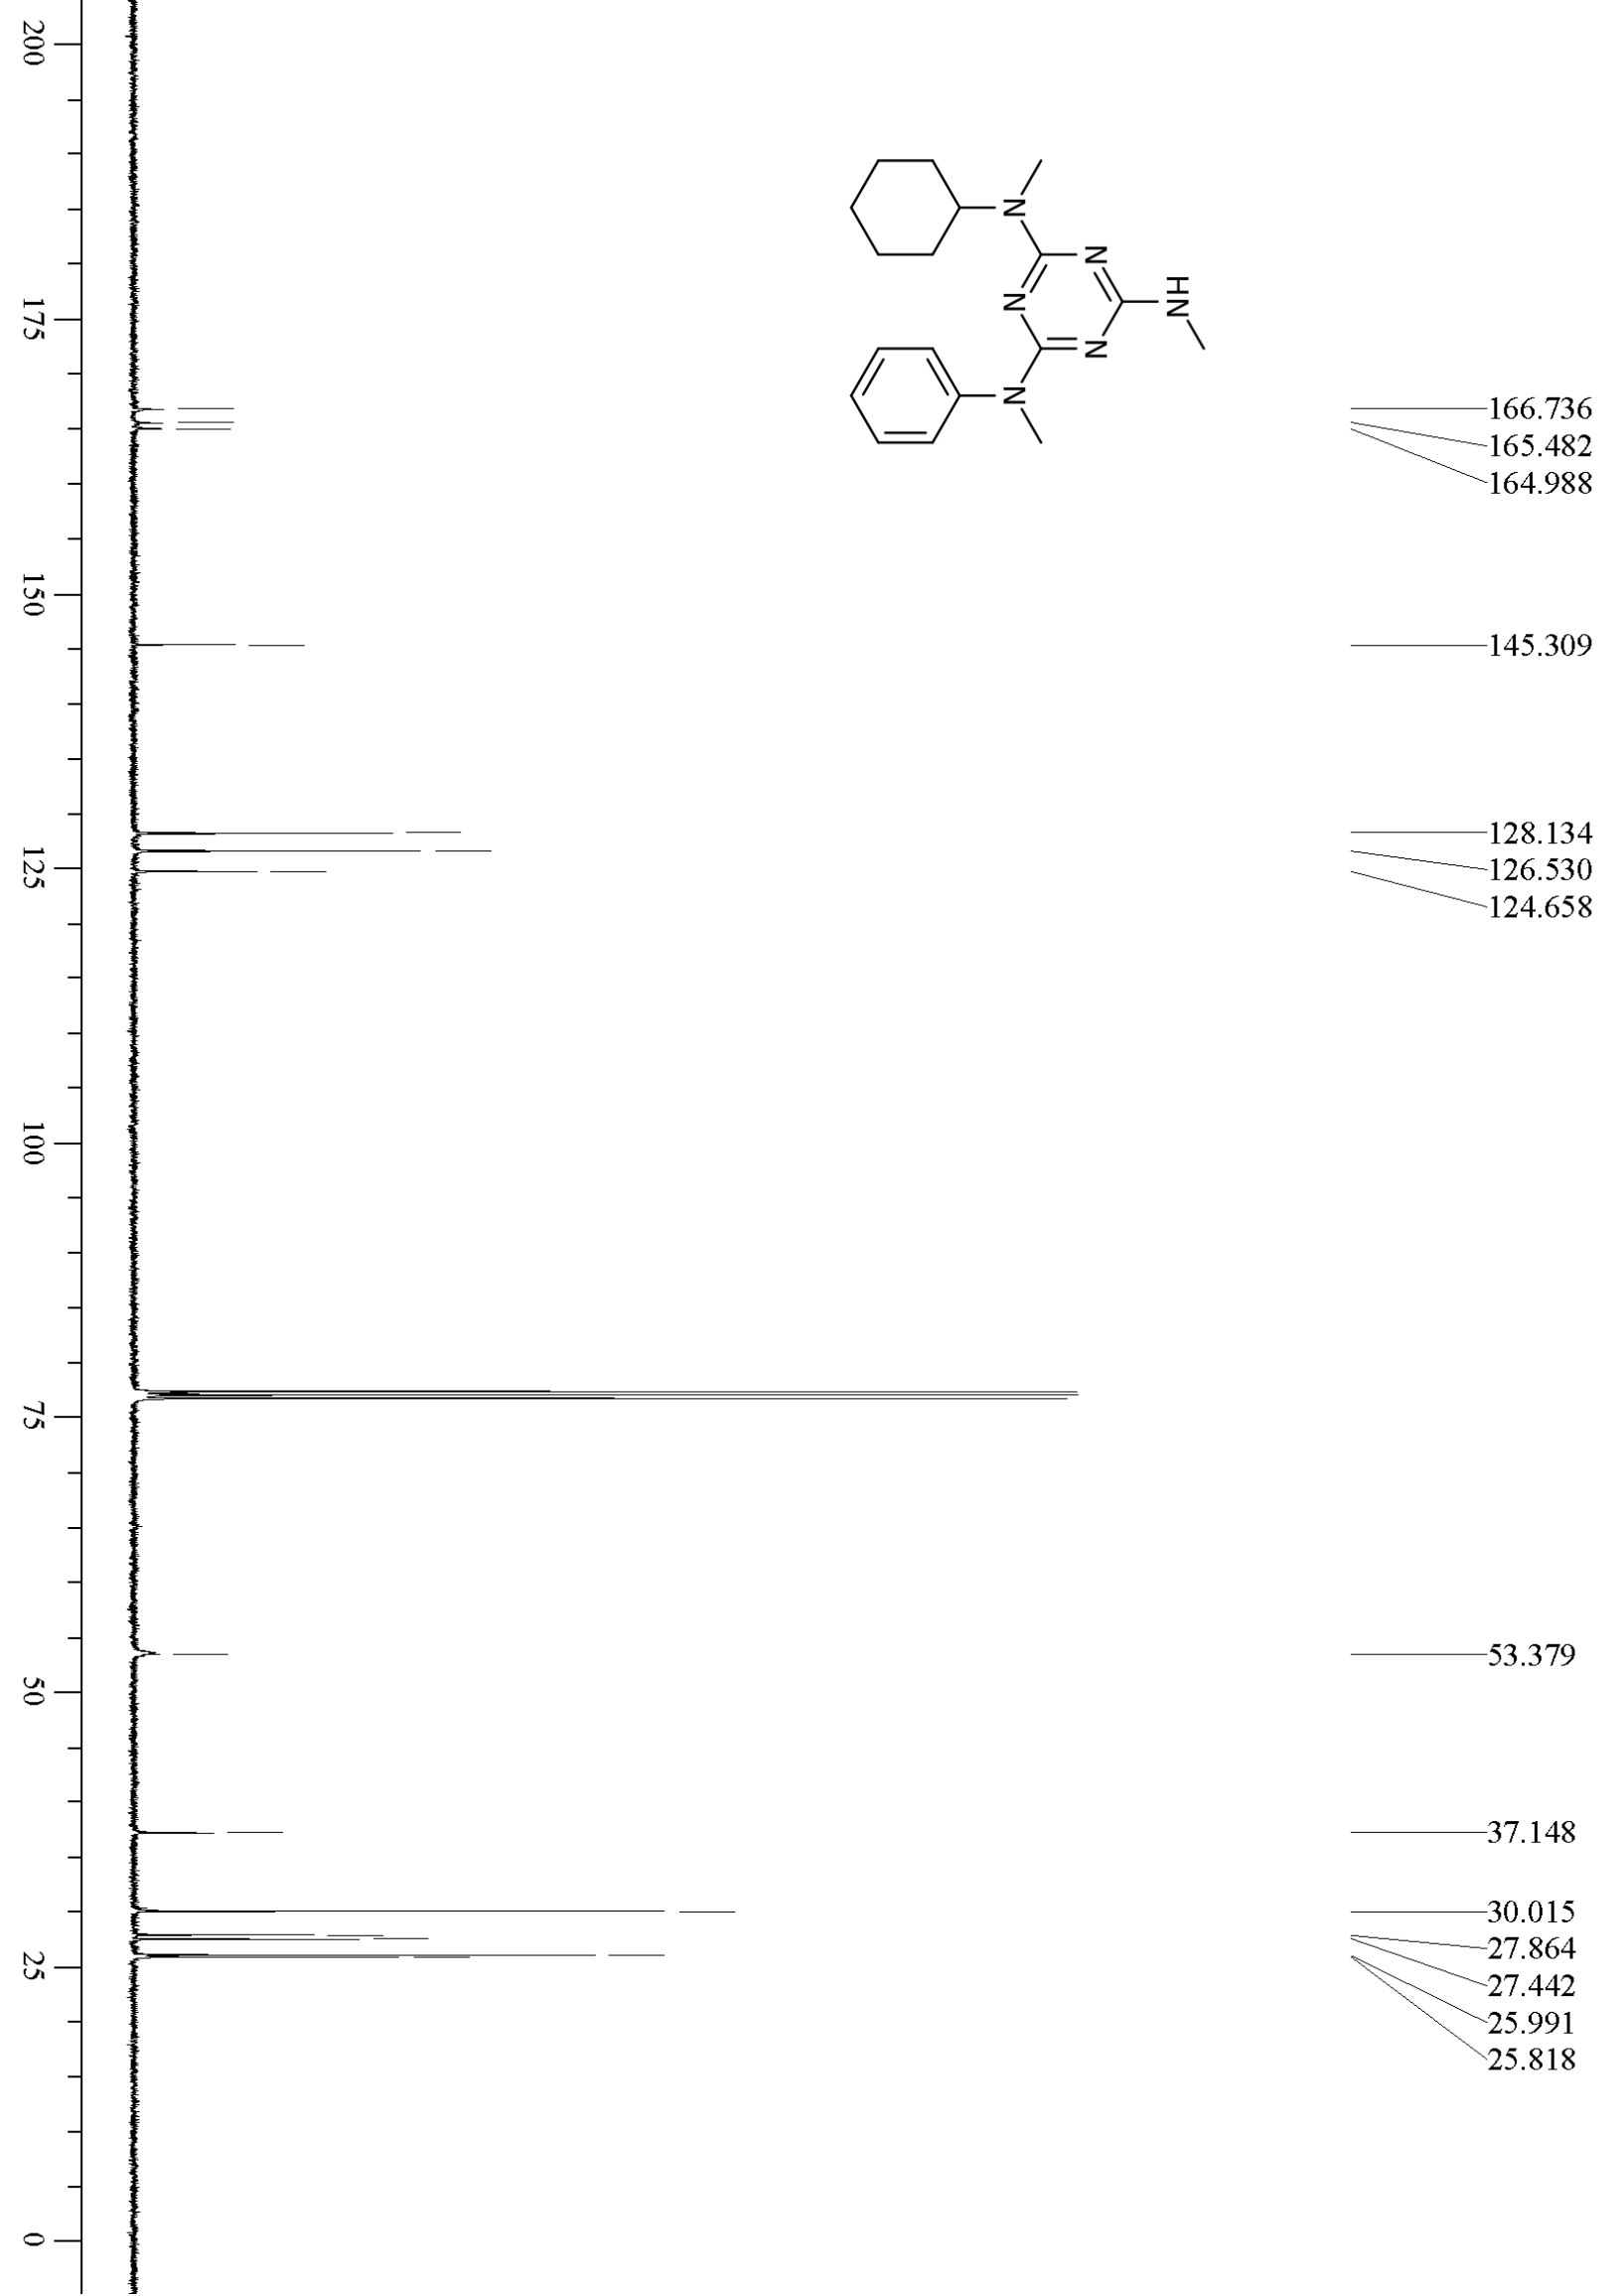

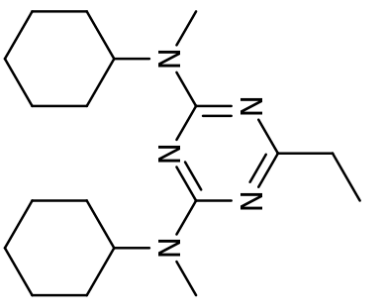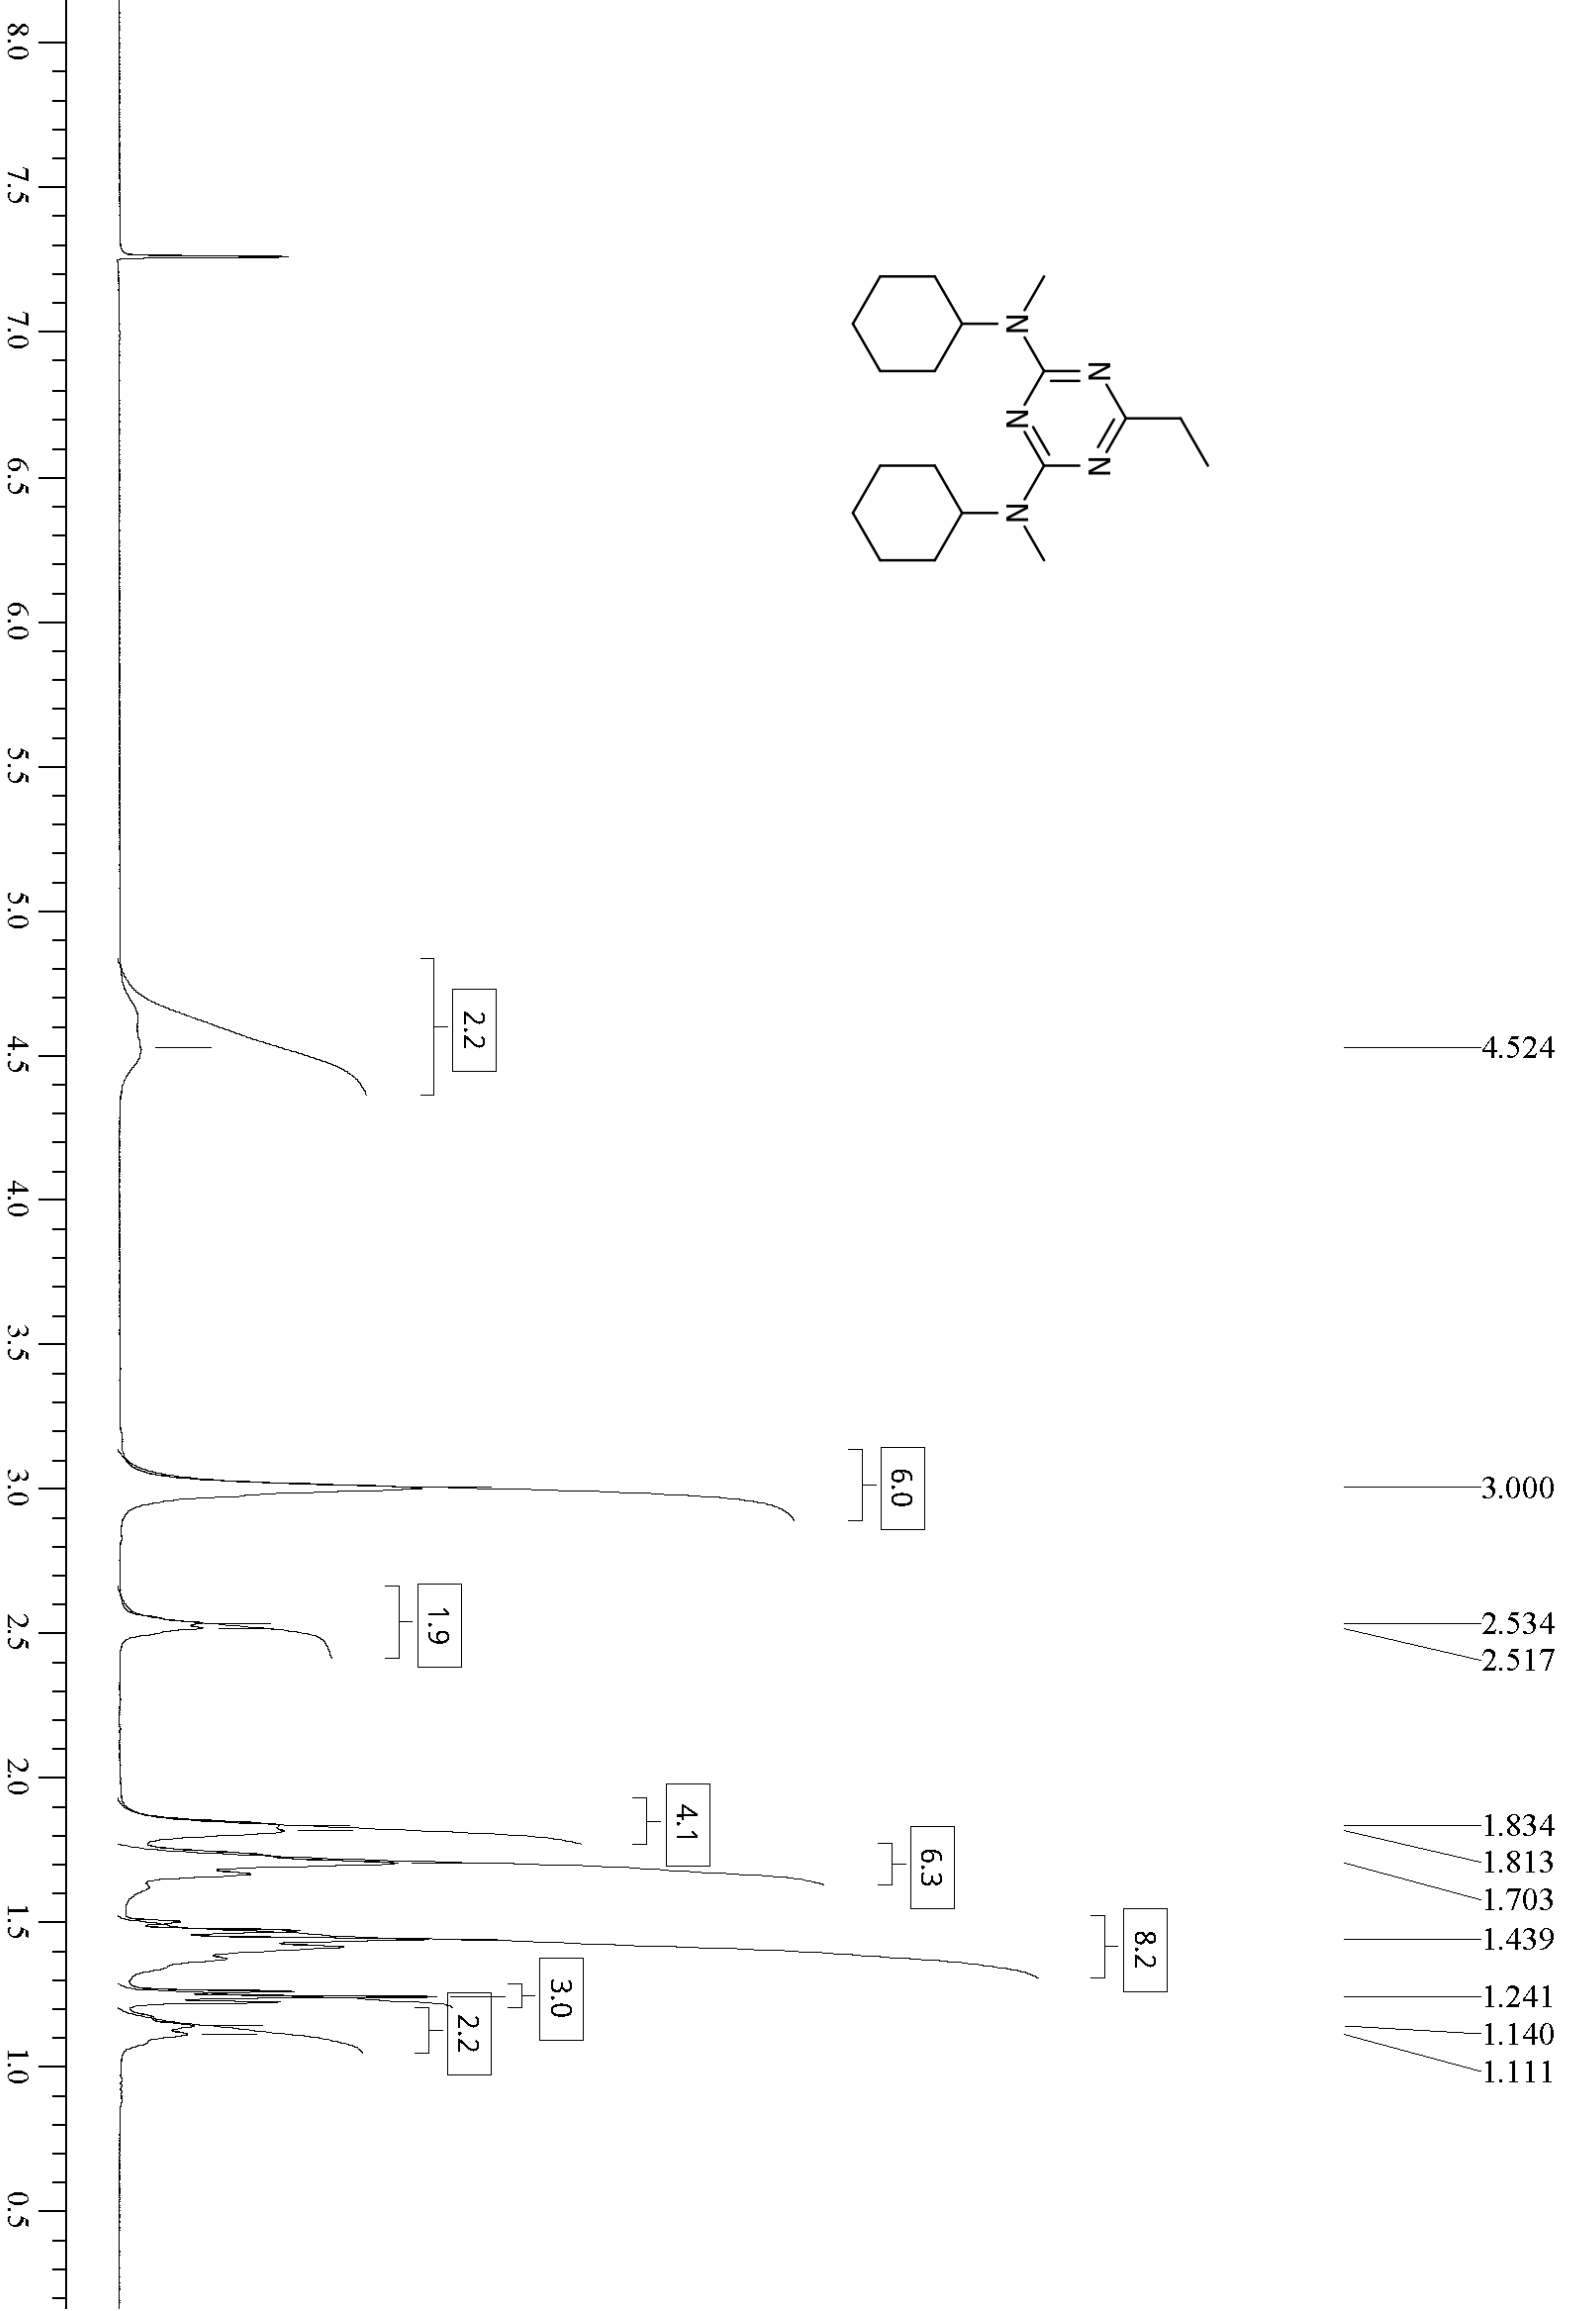

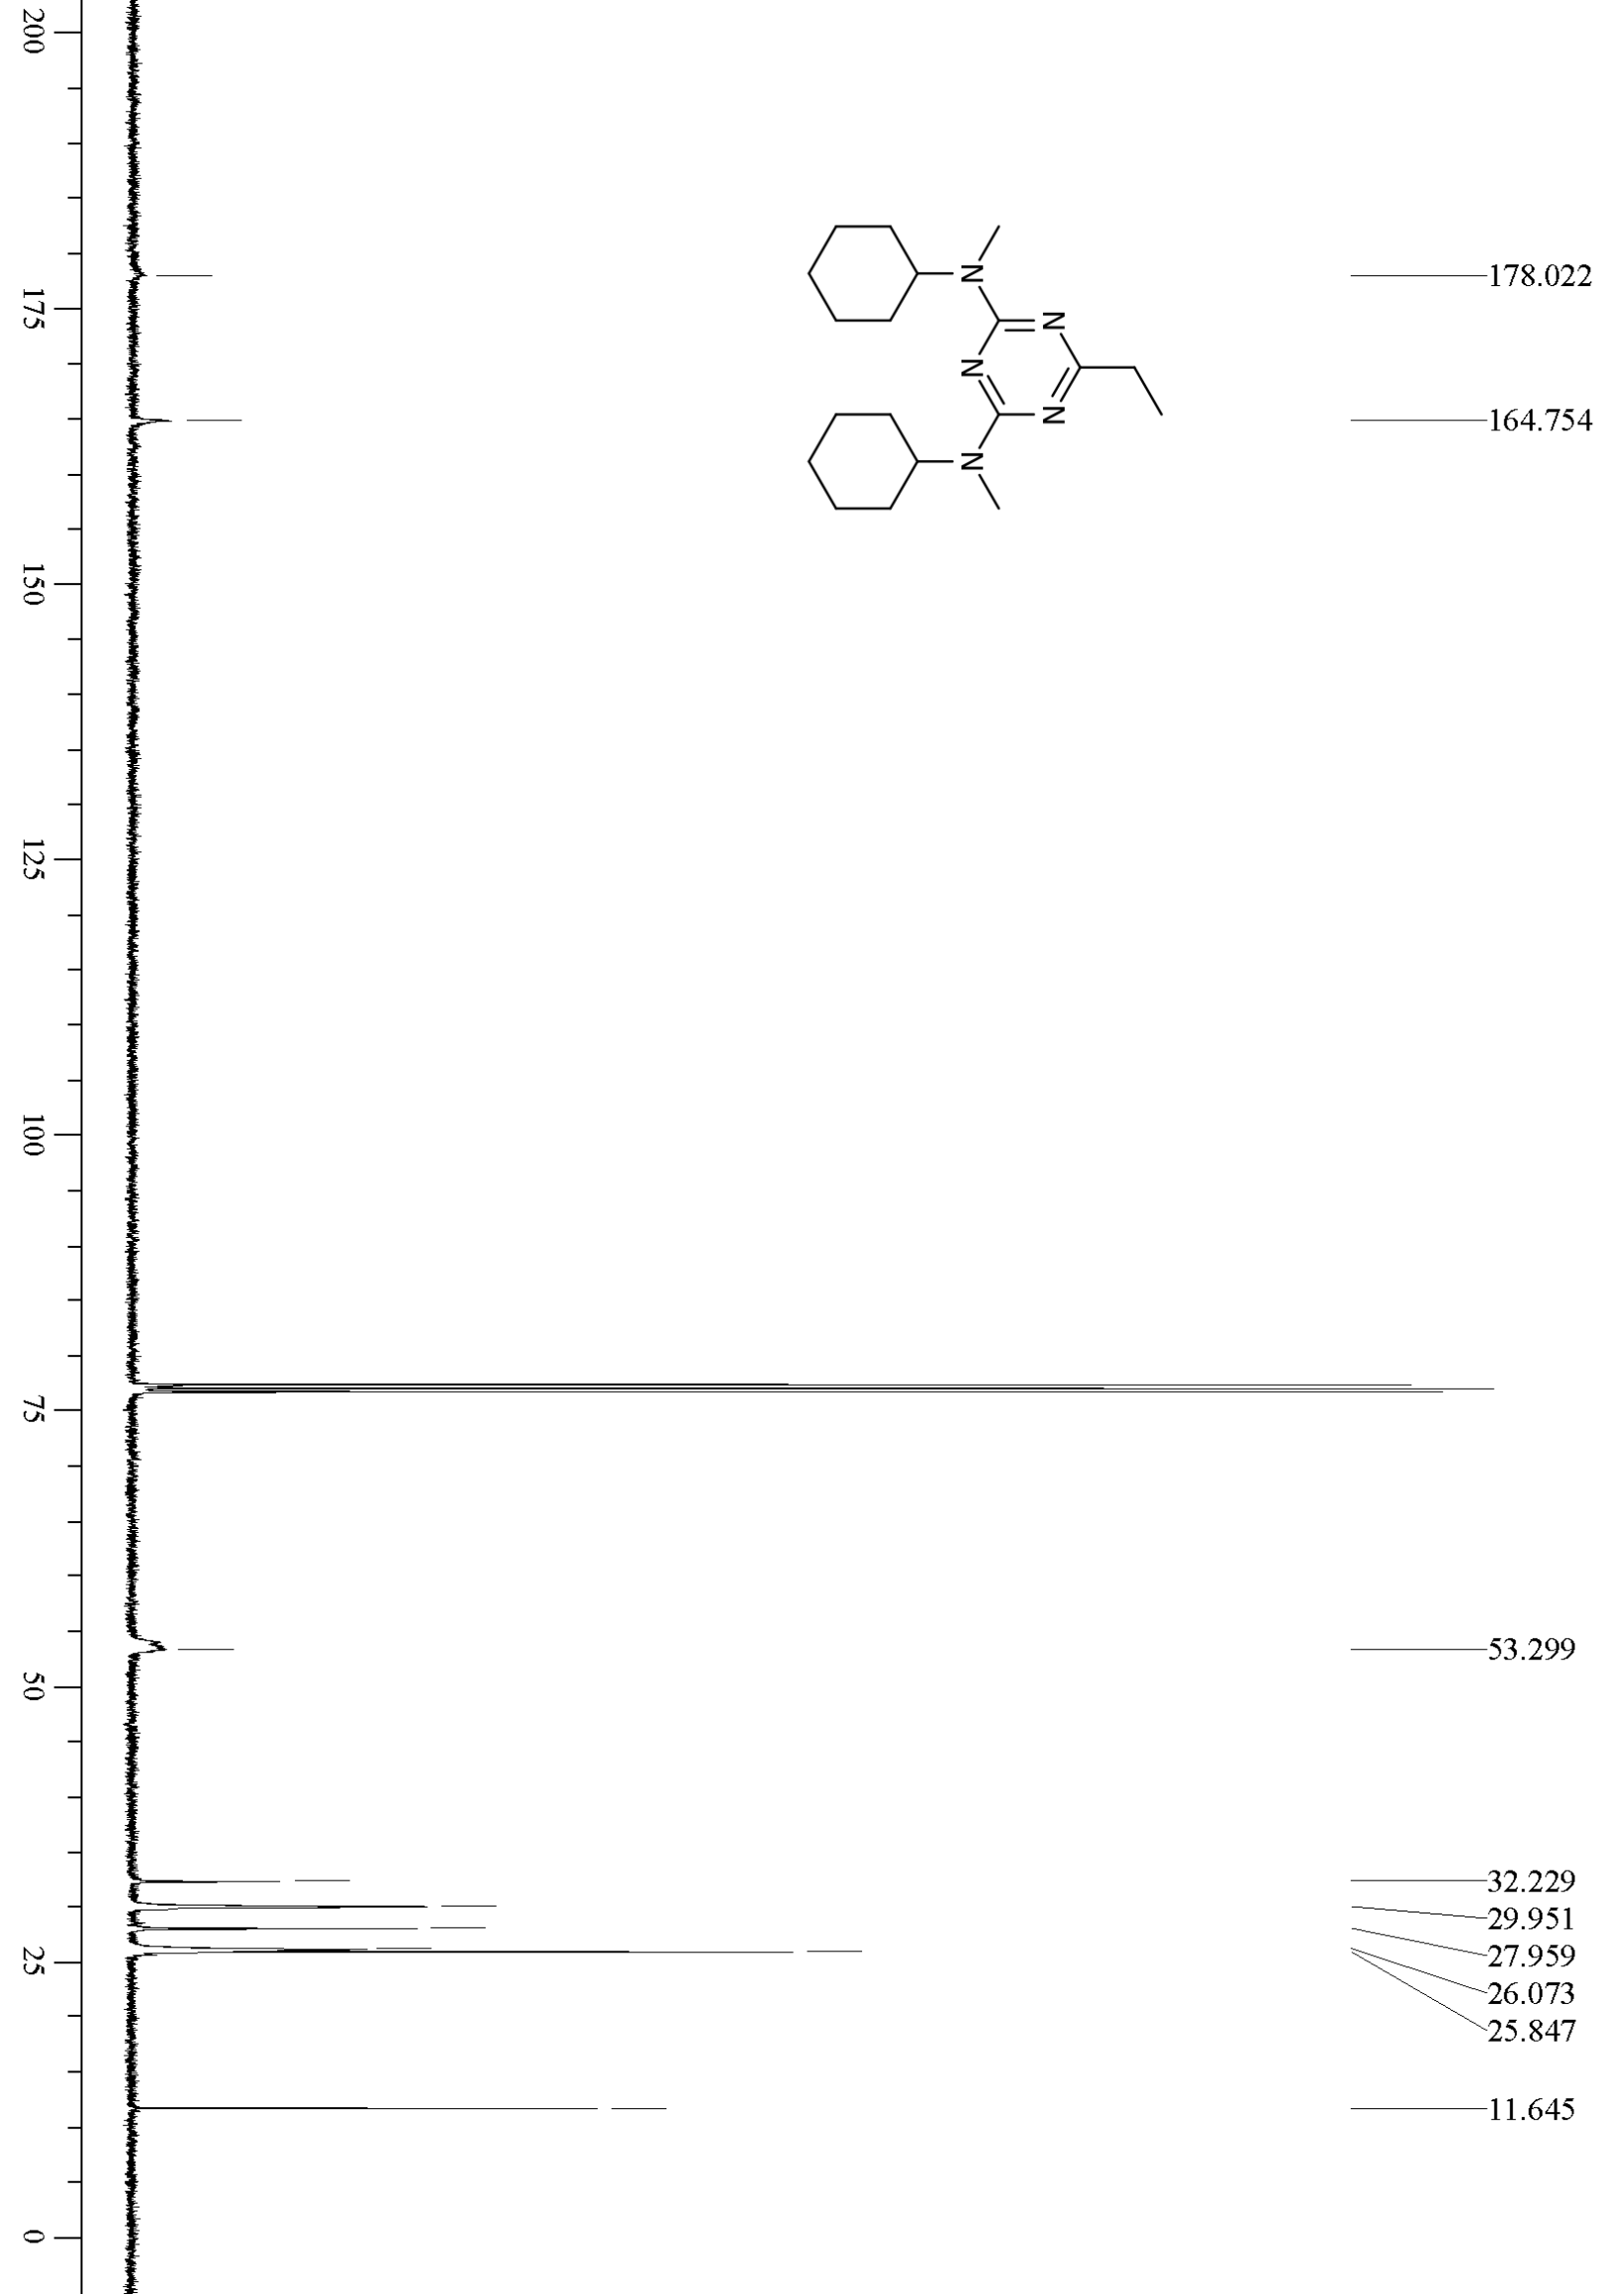



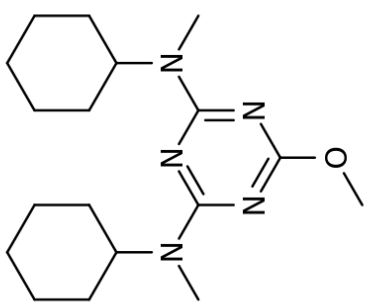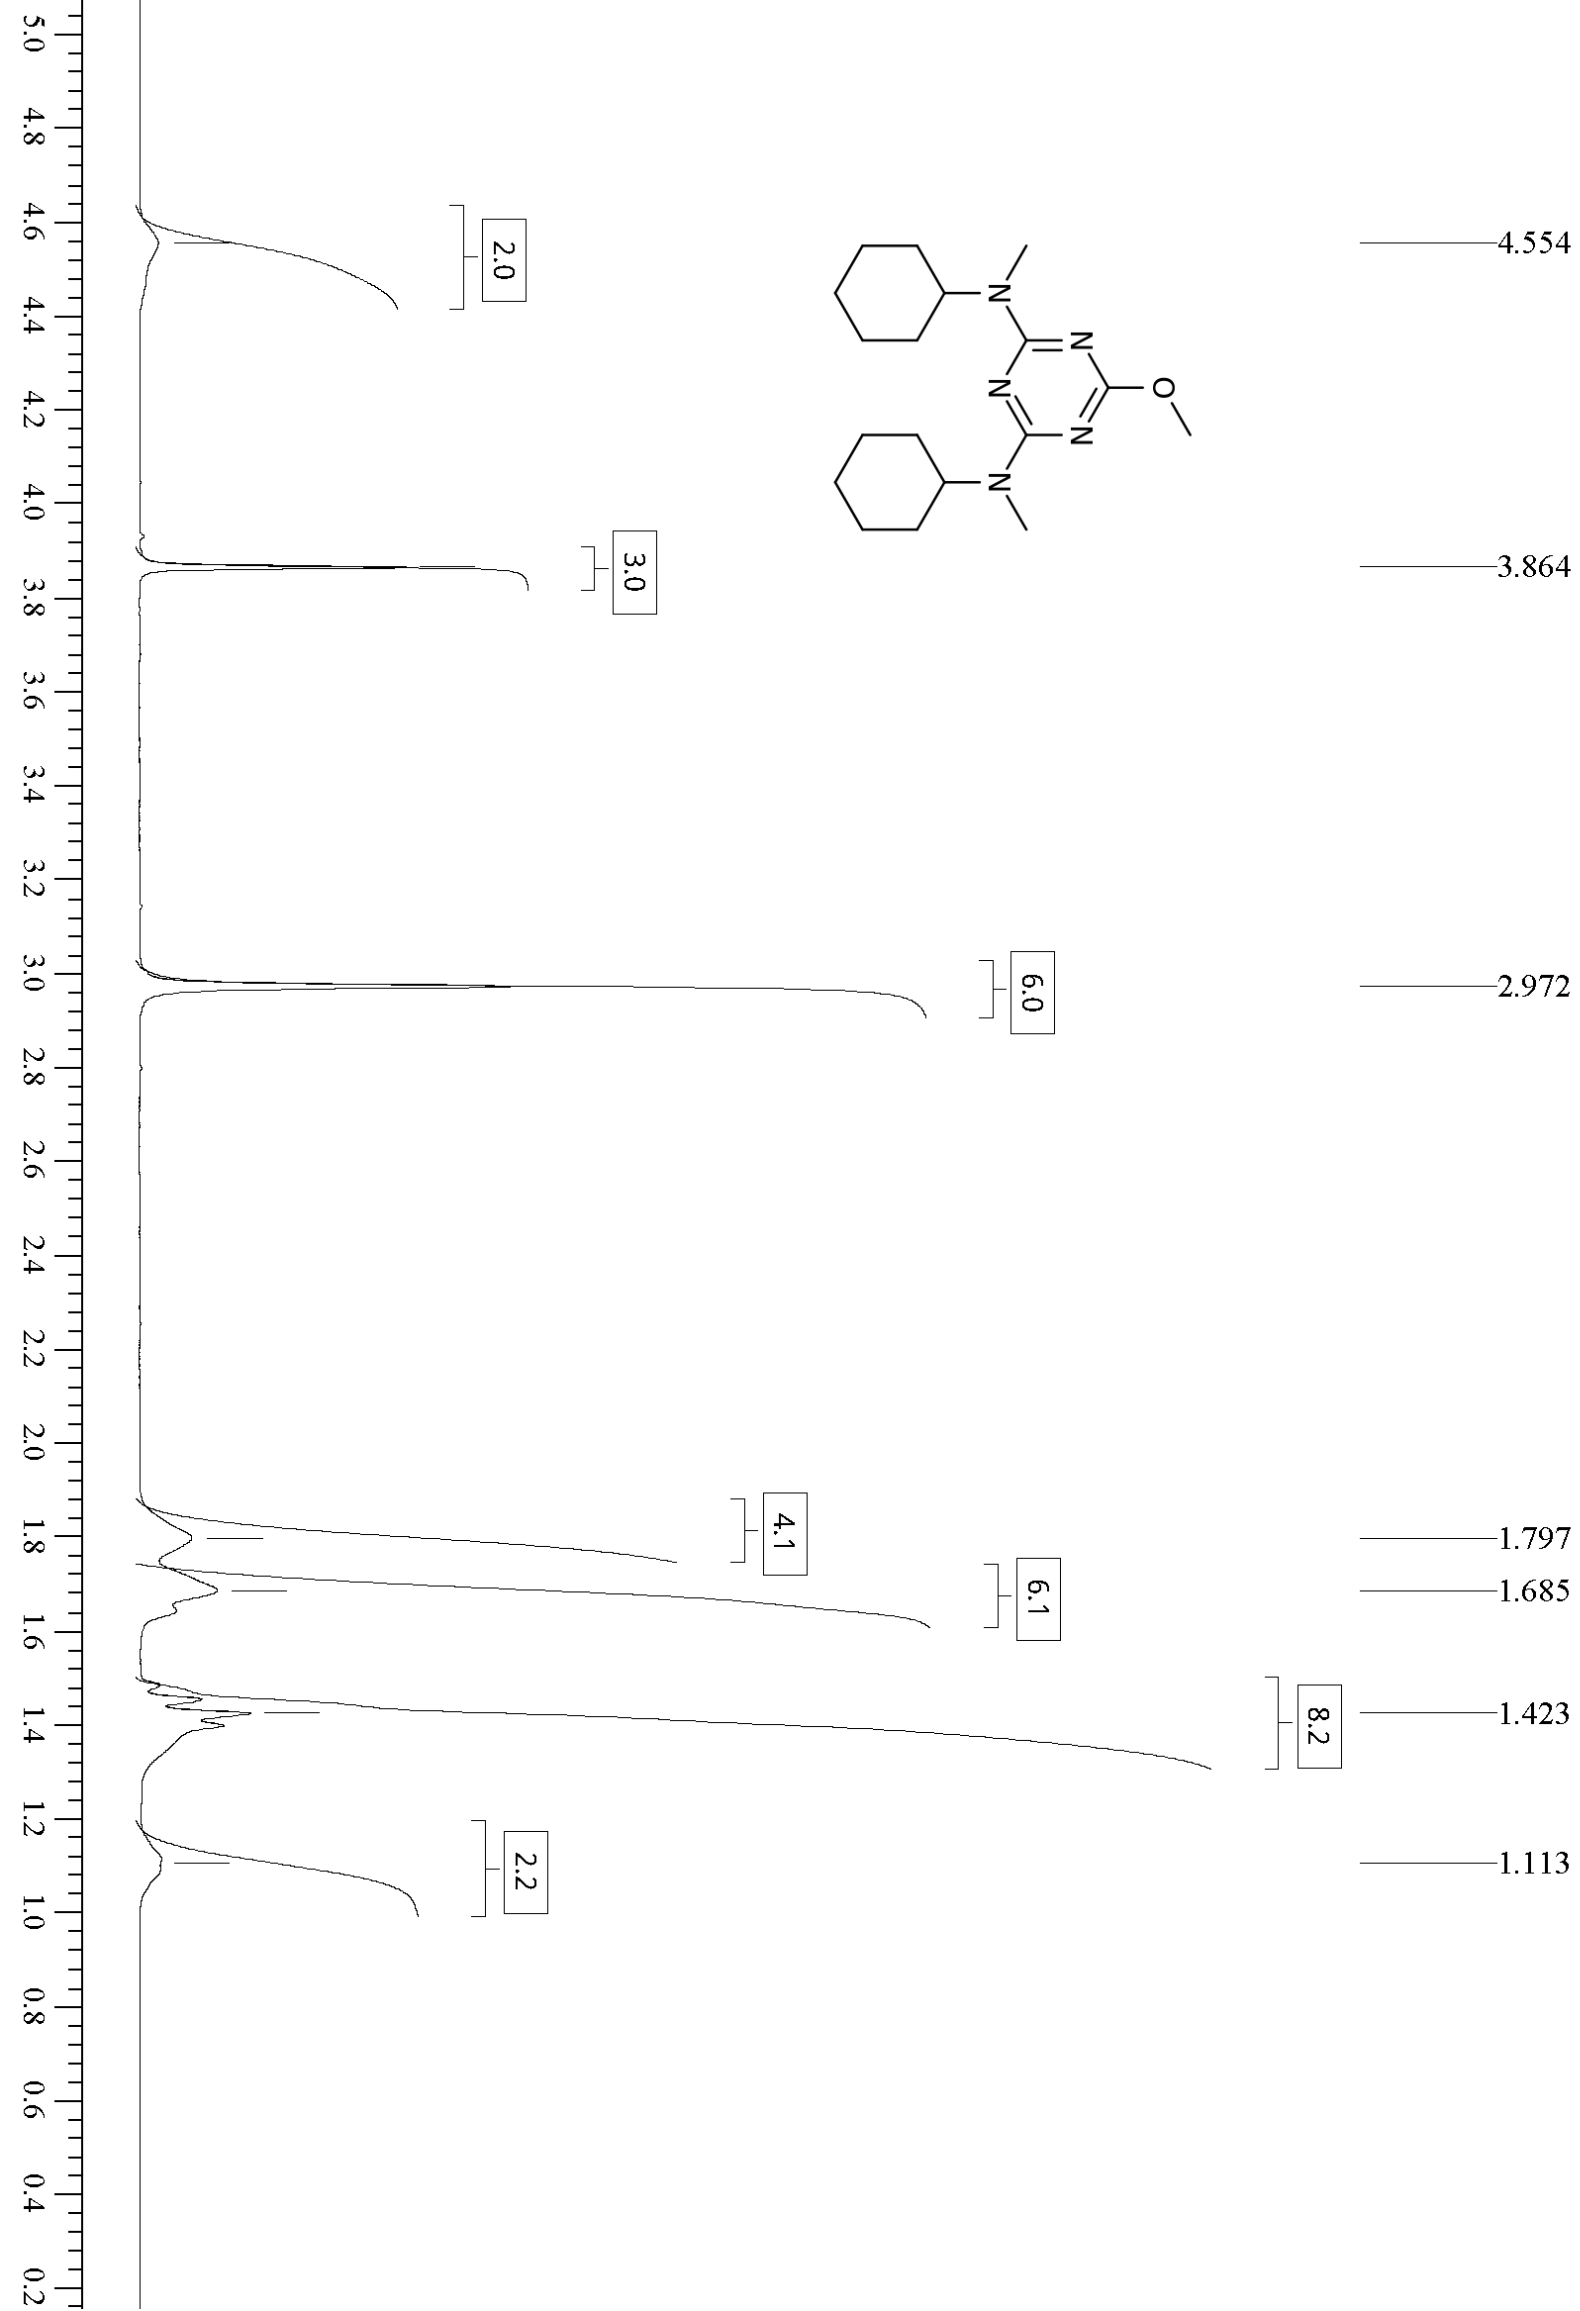

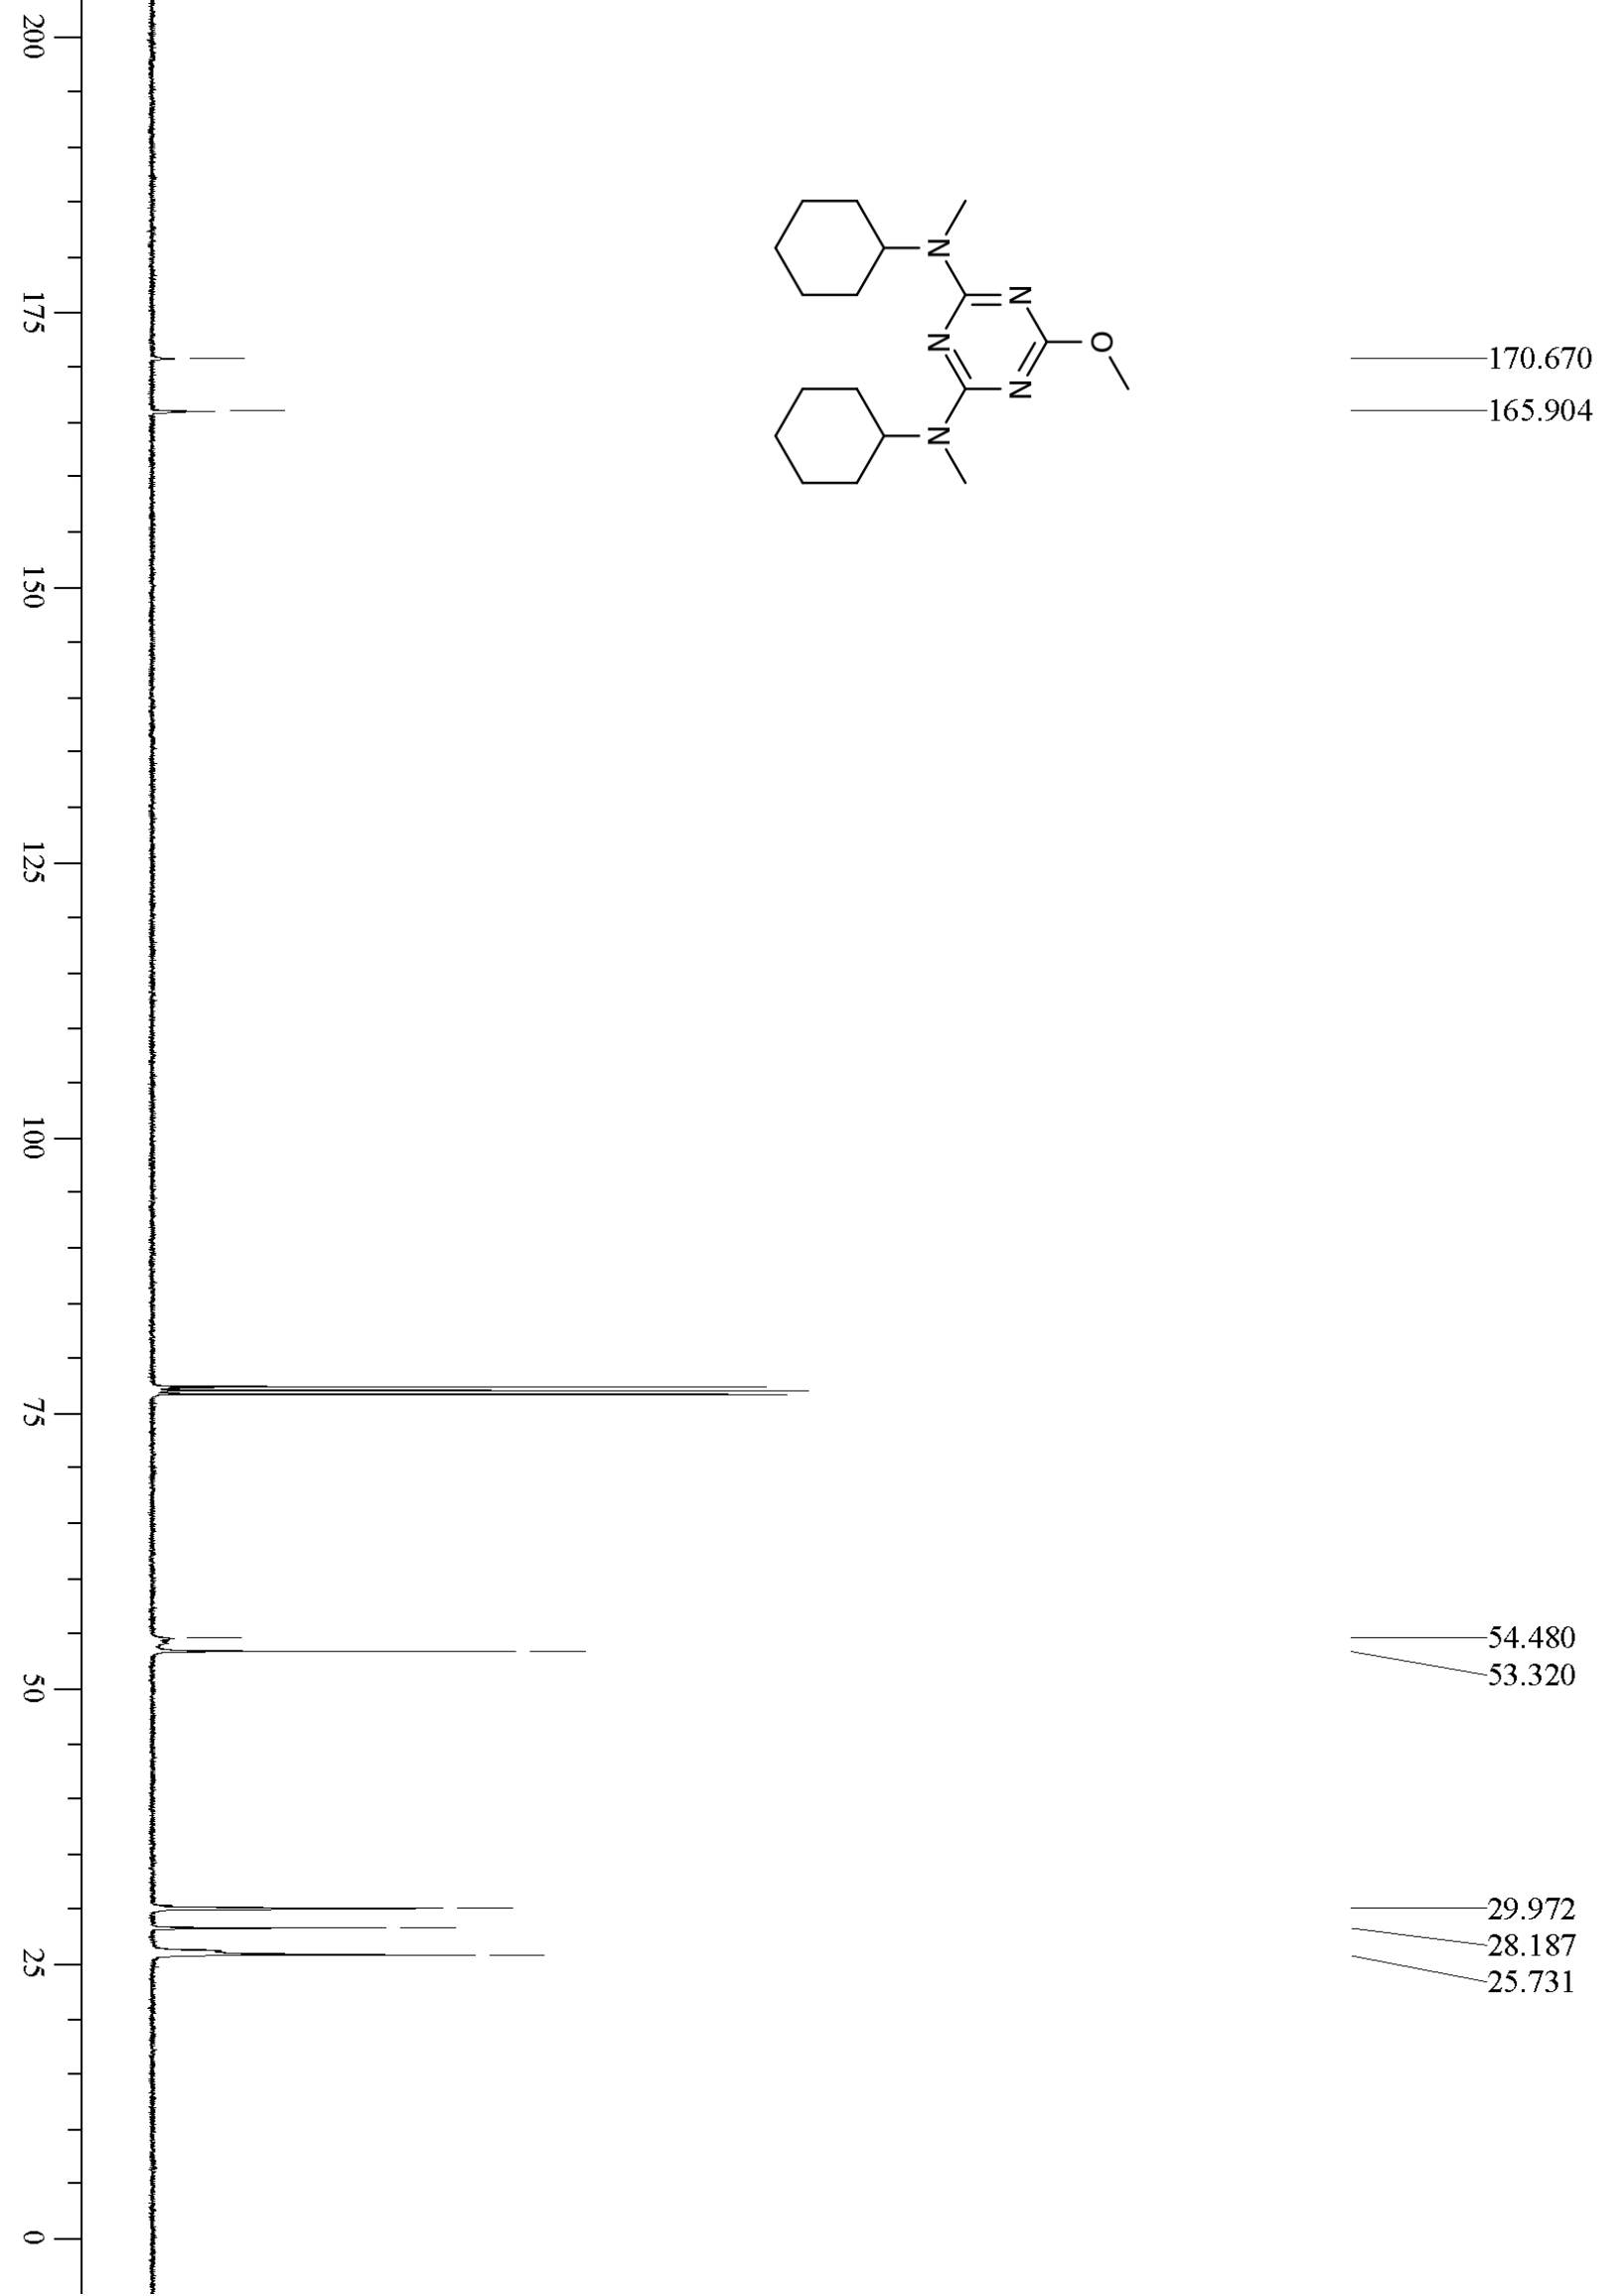

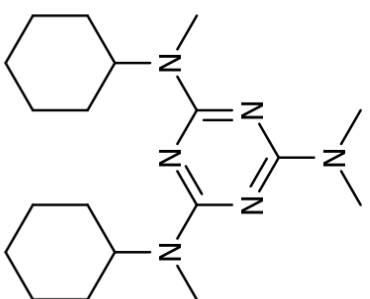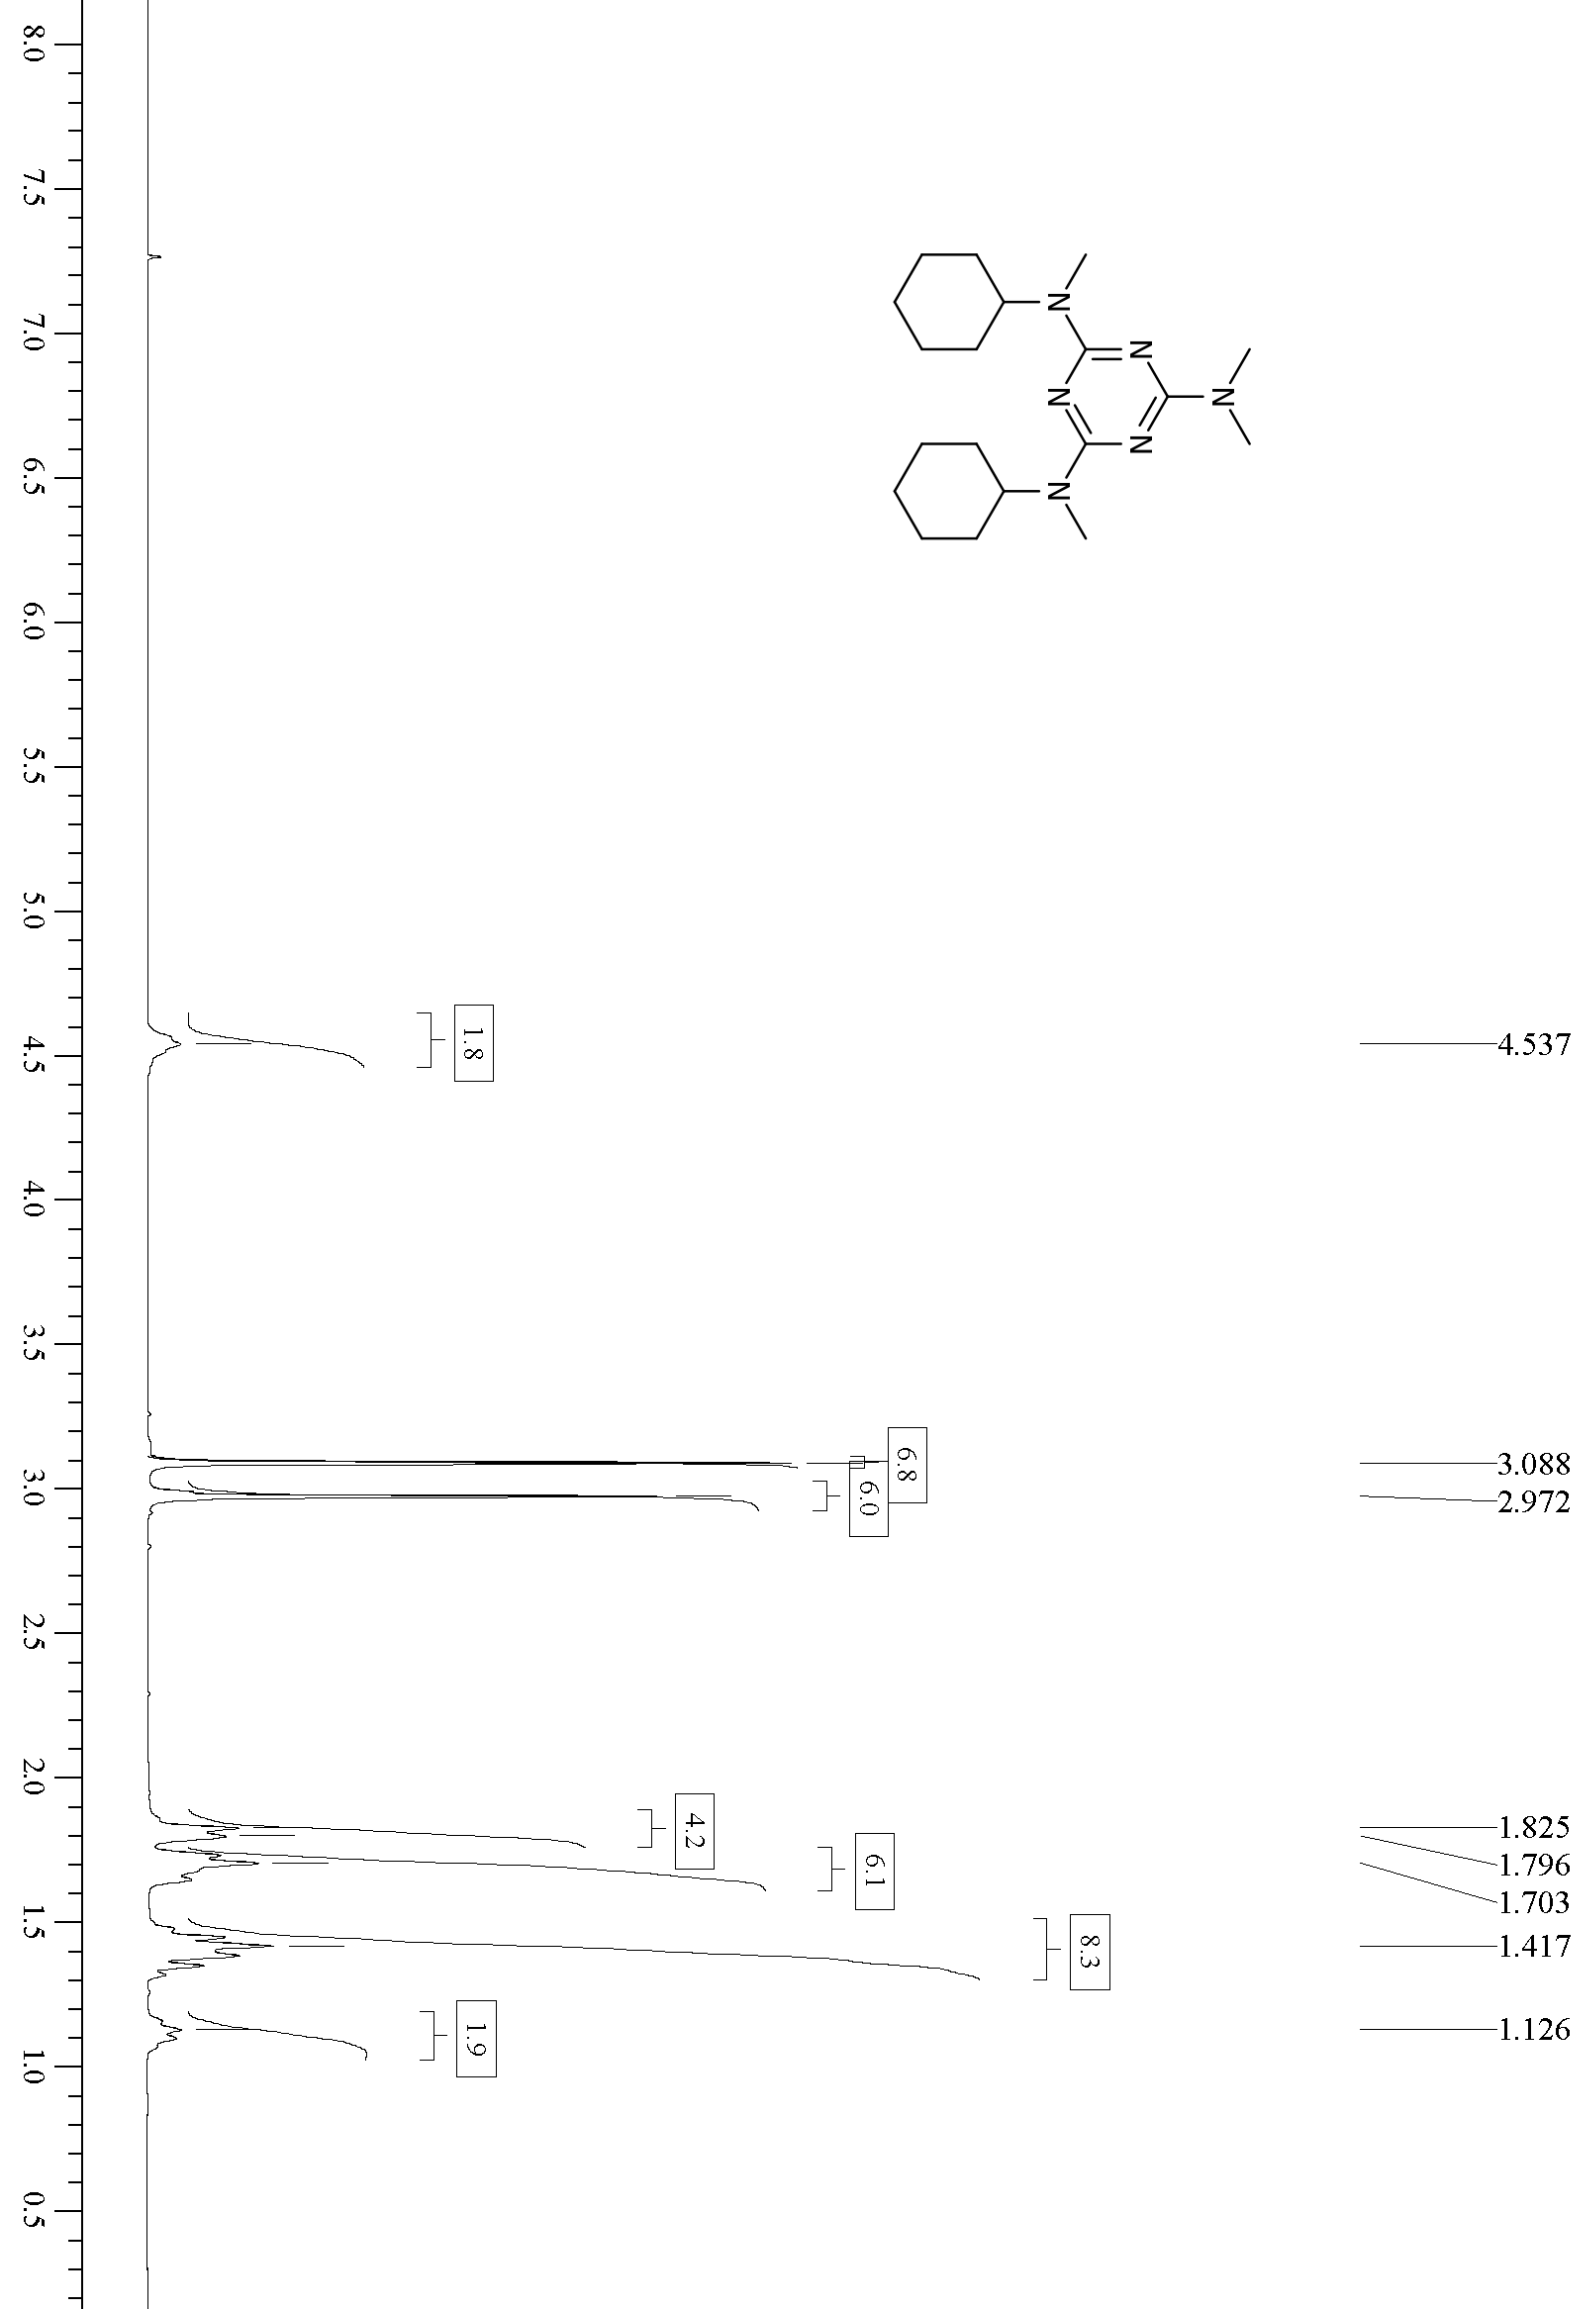

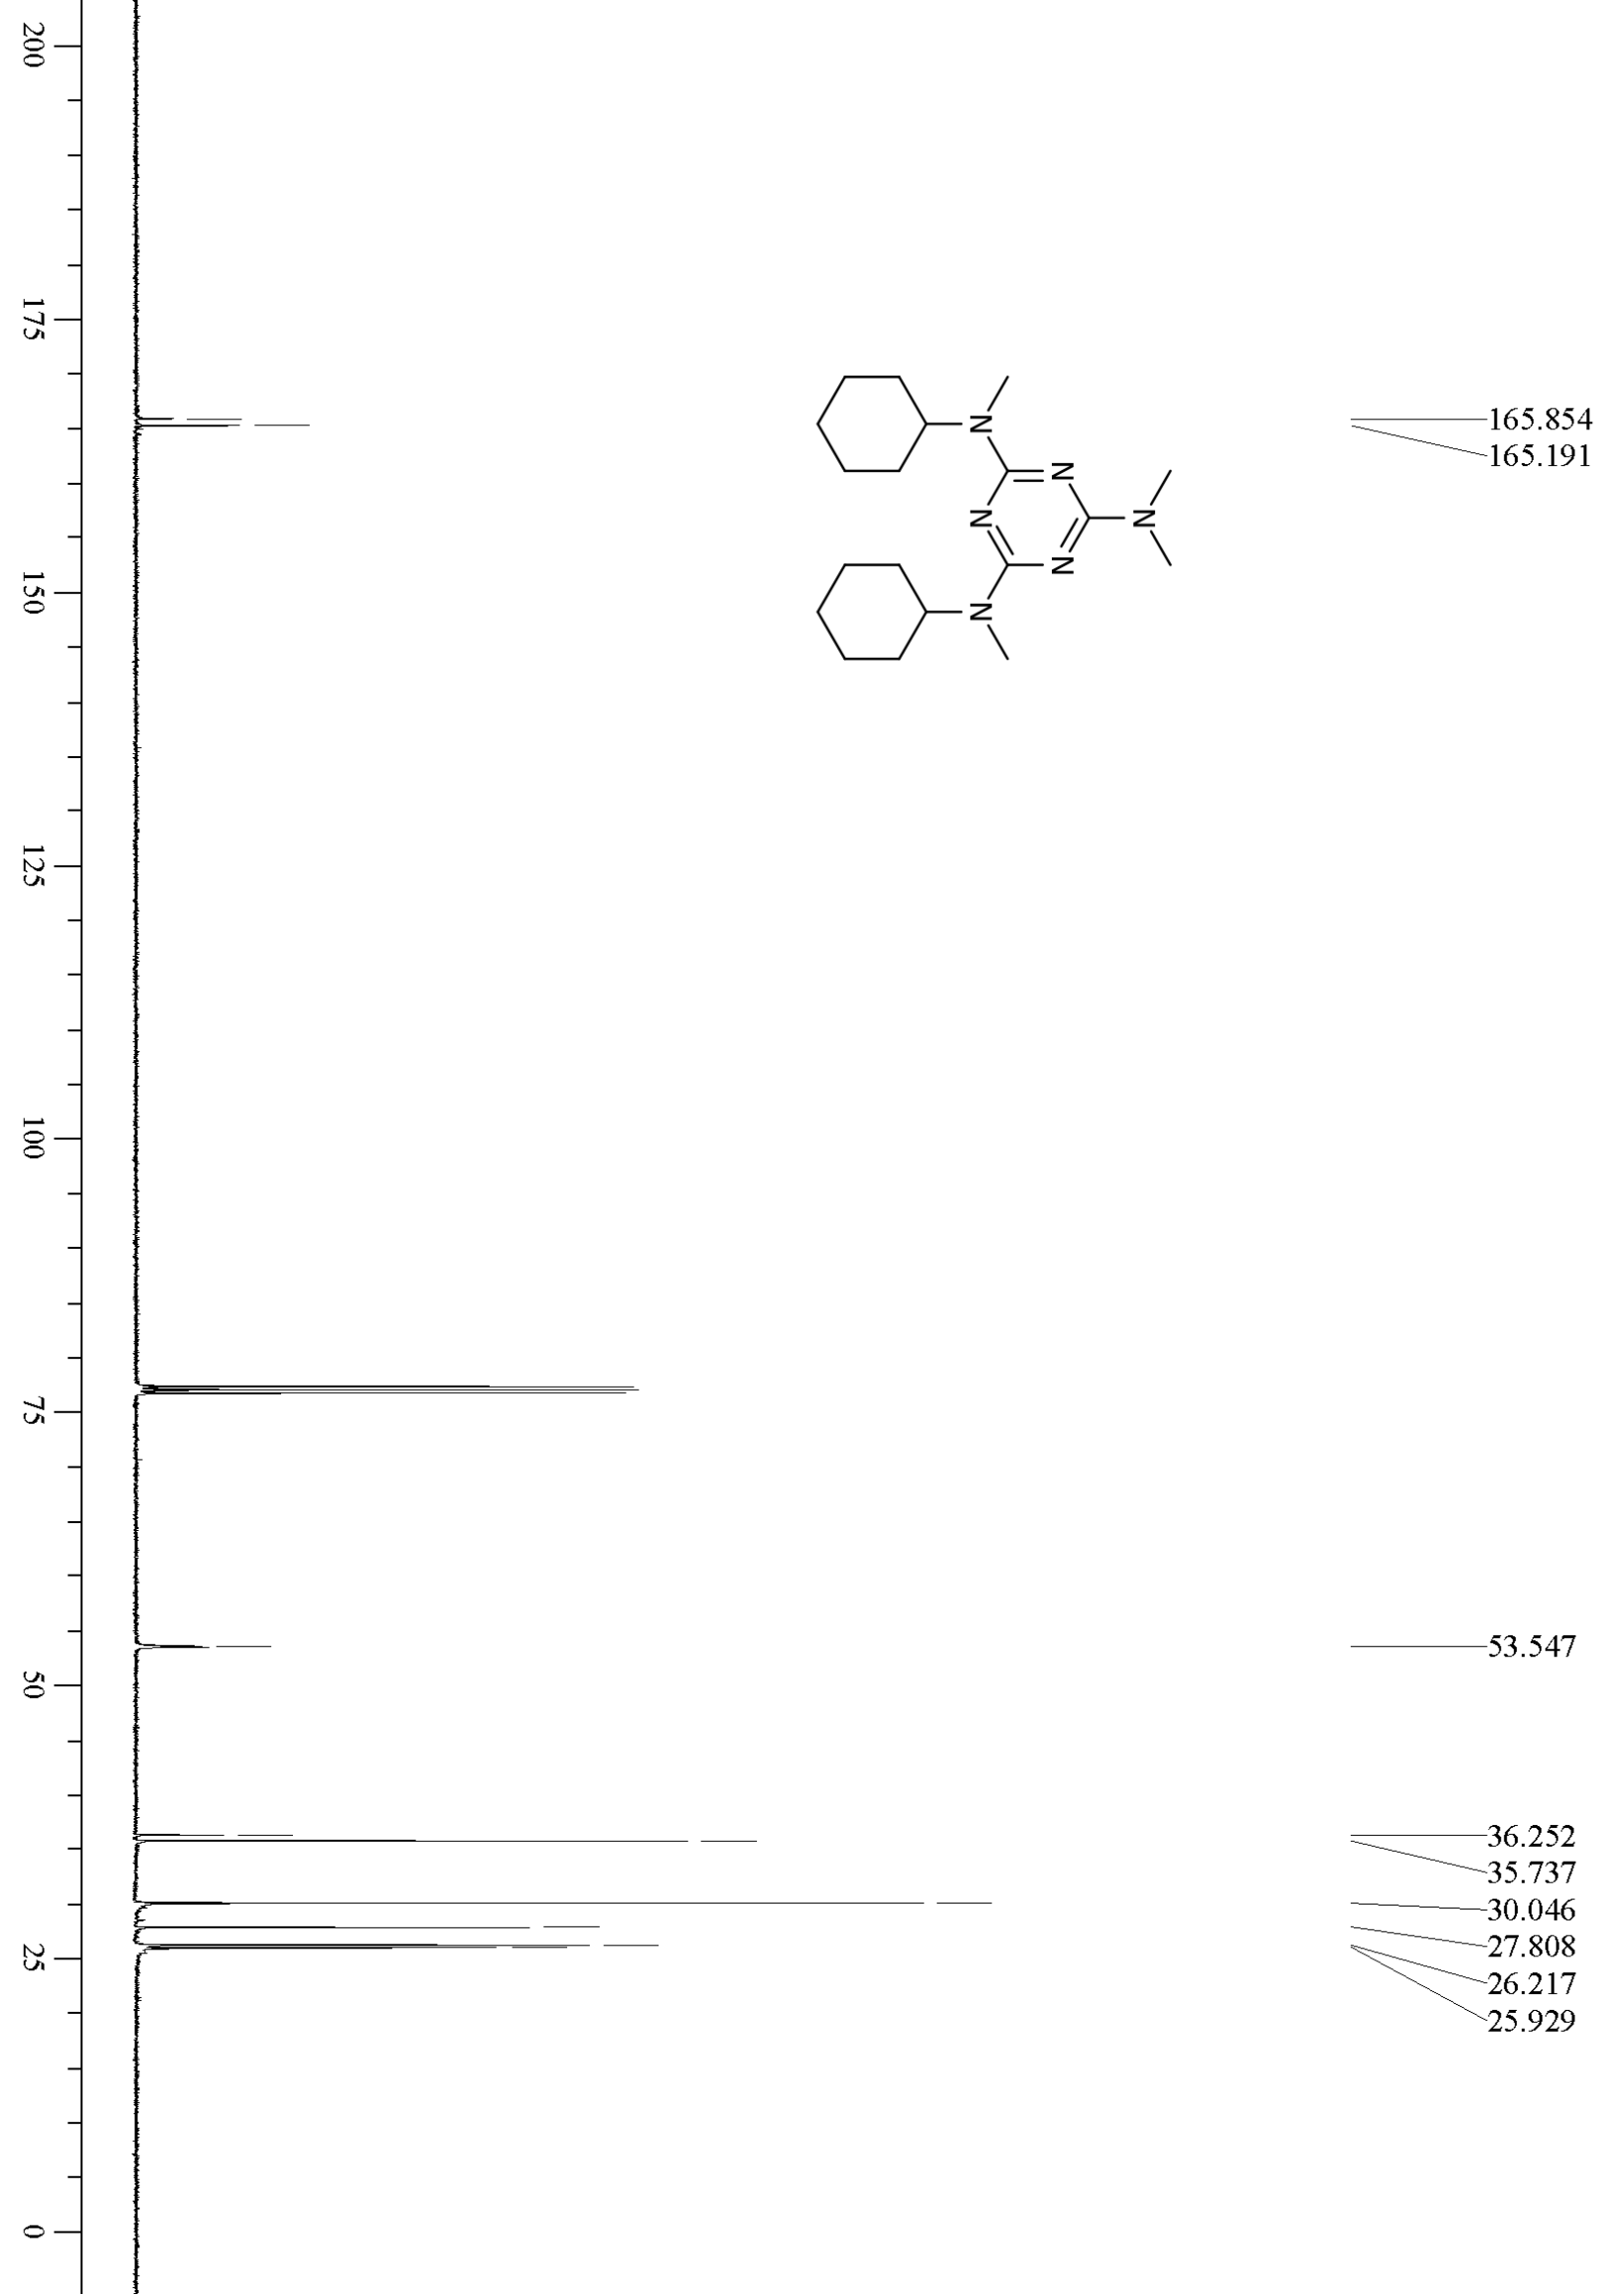

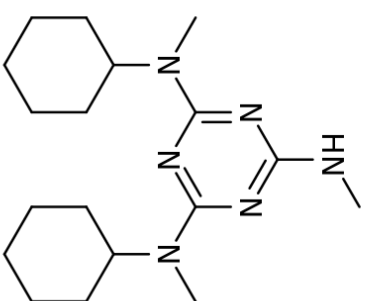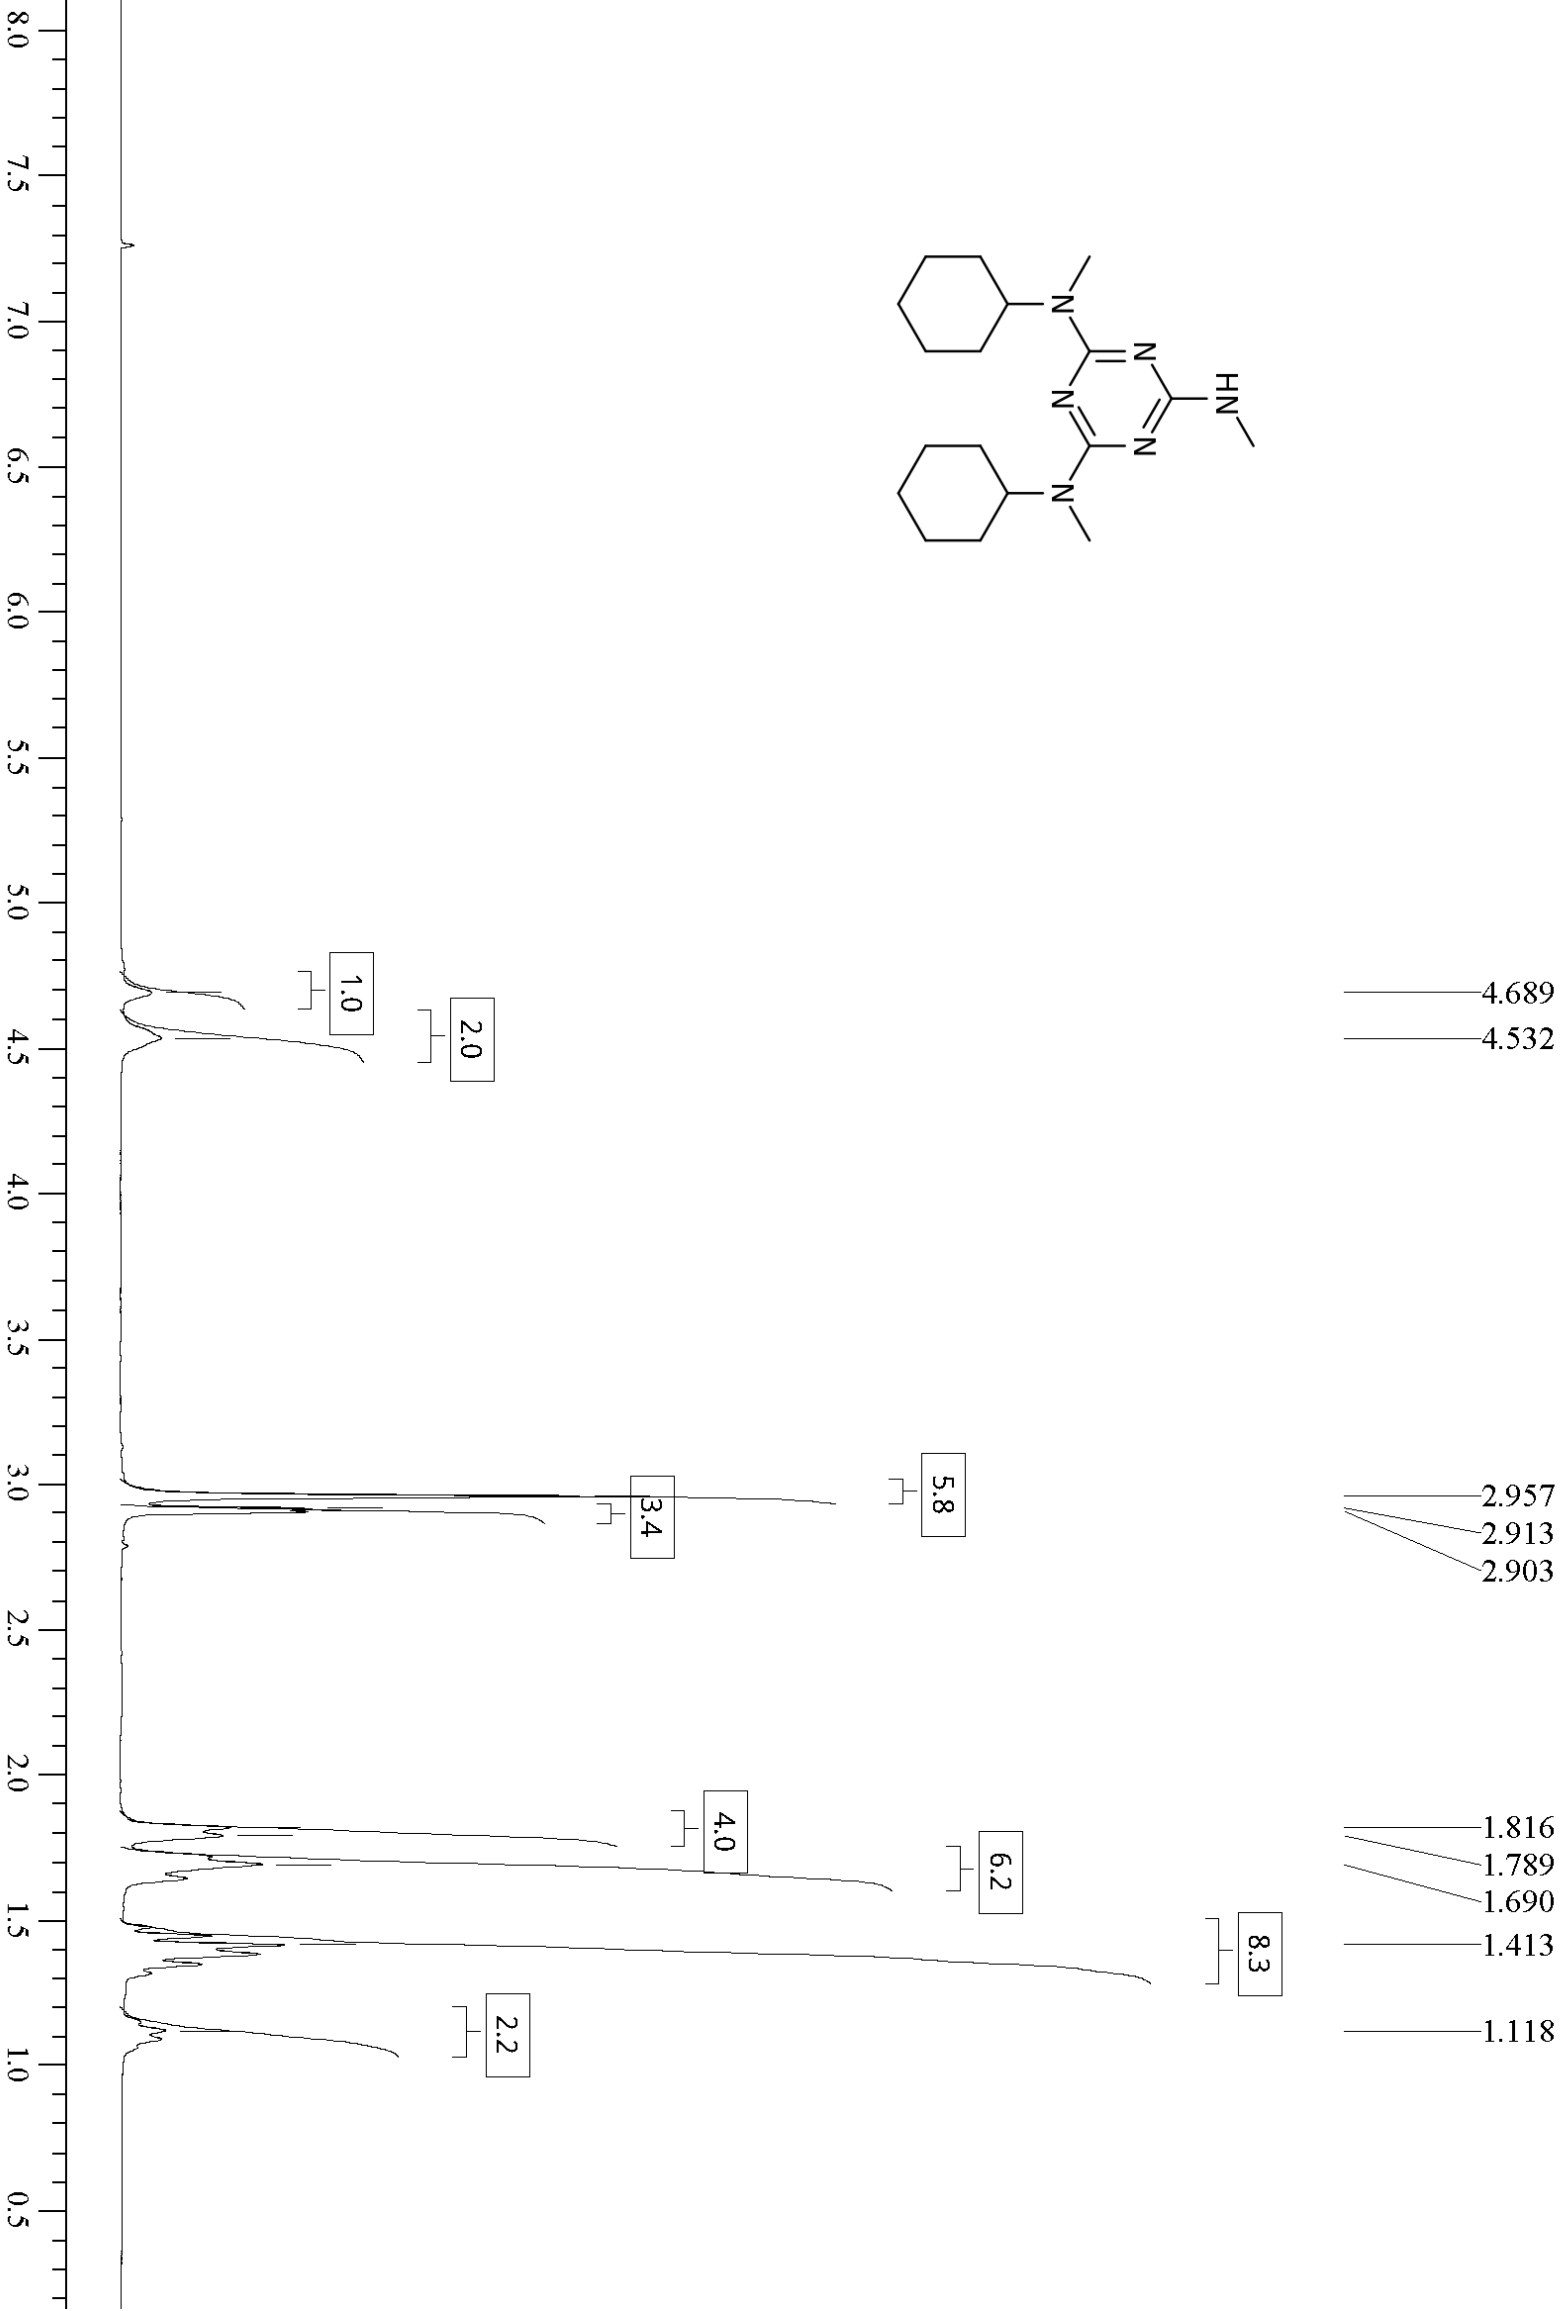

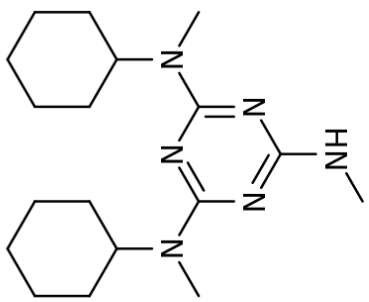

166.795  
165.102

200  
175  
150  
125  
100  
75  
50  
25  
0

53.386

30.045  
27.823  
27.442  
26.124  
25.870

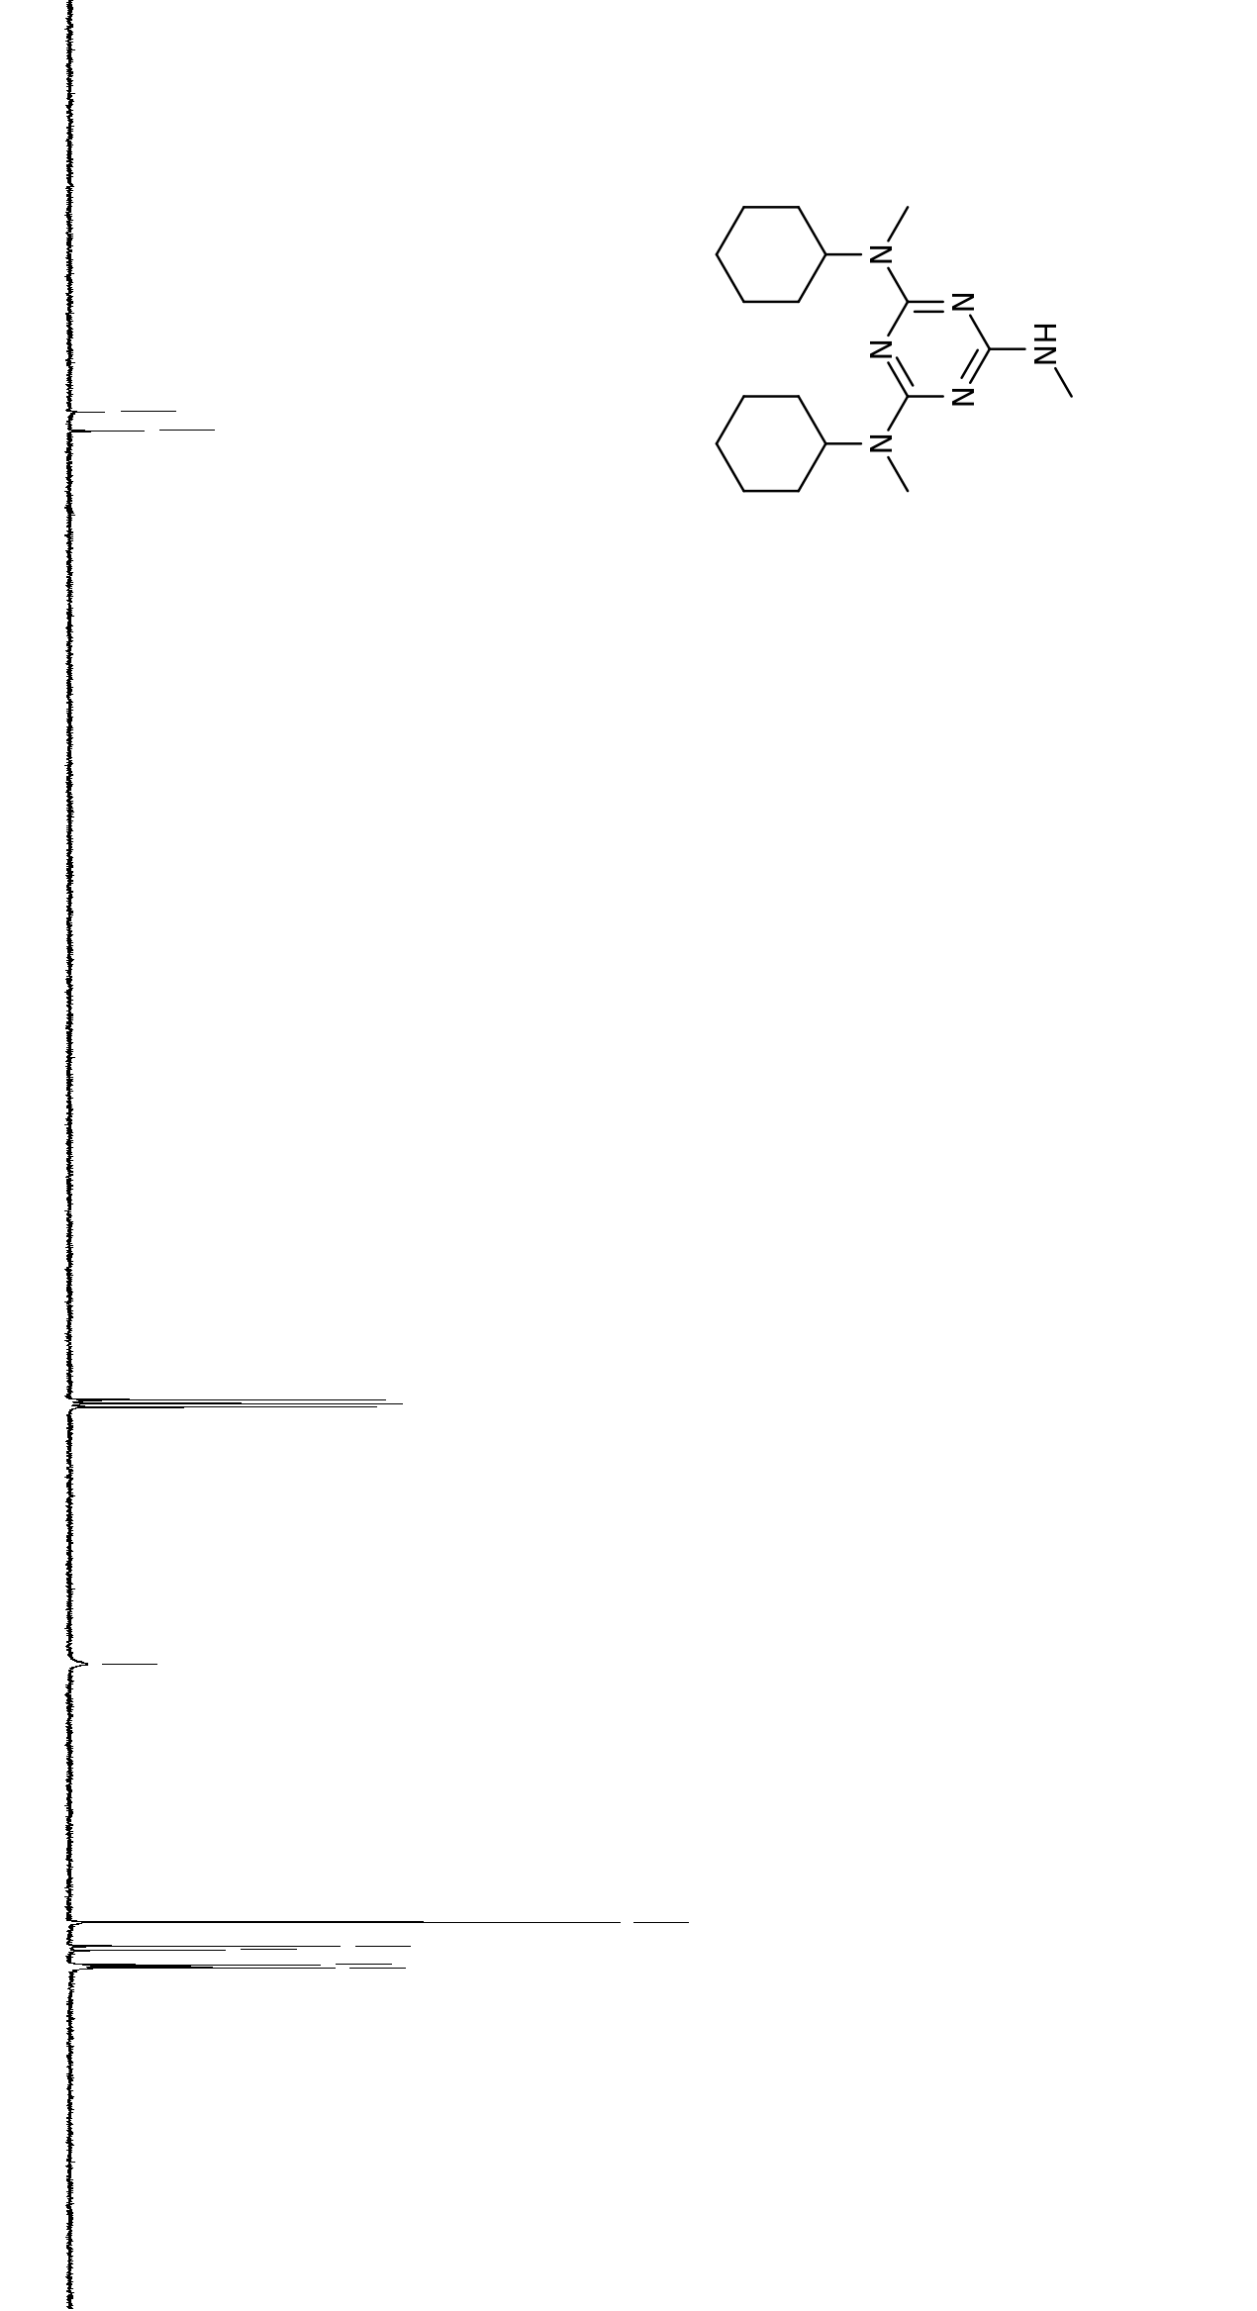

Supplement: d0ce00500b1.pdf [file d0ce00500b1.pdf]
